# Supplementary material for: The CoREST repressor complex mediates phenotype switching and therapy resistance in melanoma
Source: PubMed Central journal article supplement (PMC10940100; doi:10.1172/jci171063), 2024-02-01

The CoREST repressor complex  
mediates phenotype switching and  
therapy resistance in melanoma  
(171063-JCI-RG-RV-2)

Unedited blot images

# Full unedited gel for Figure 1A

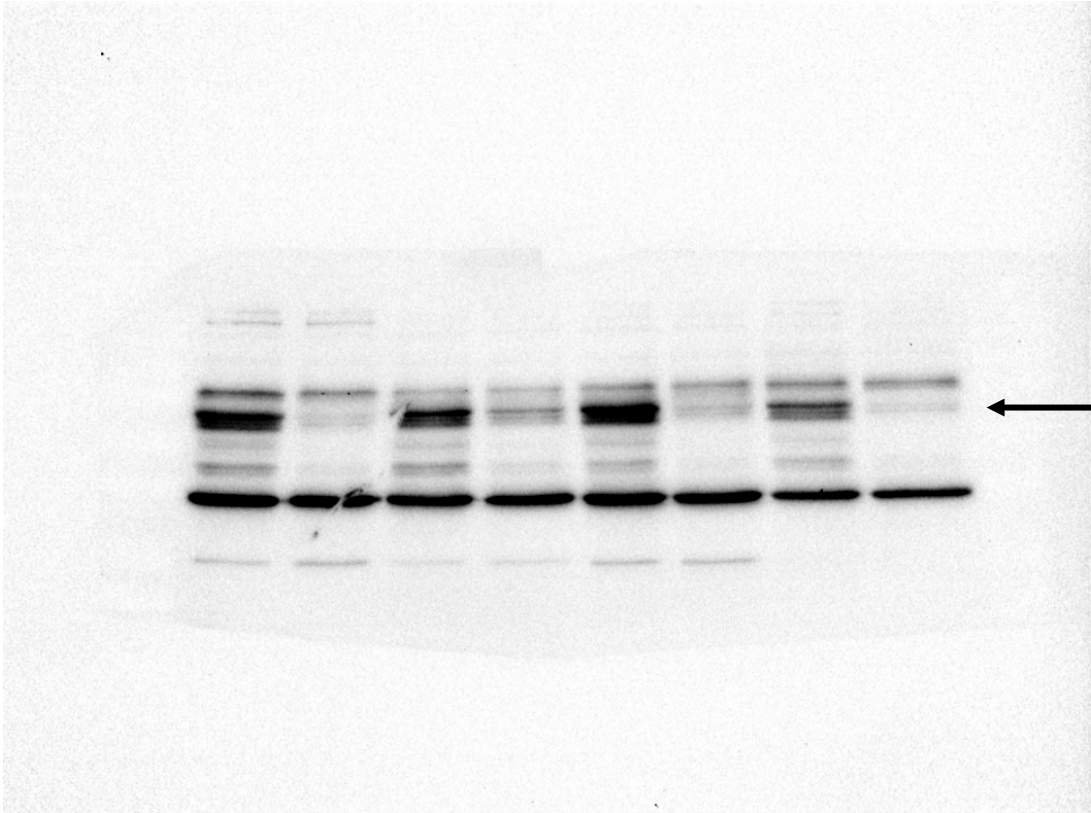

MITF  
65 kDa  
(Cell Signaling, 12590s, 1:1000)

Figure 1A

# Full unedited gel for Figure 1A

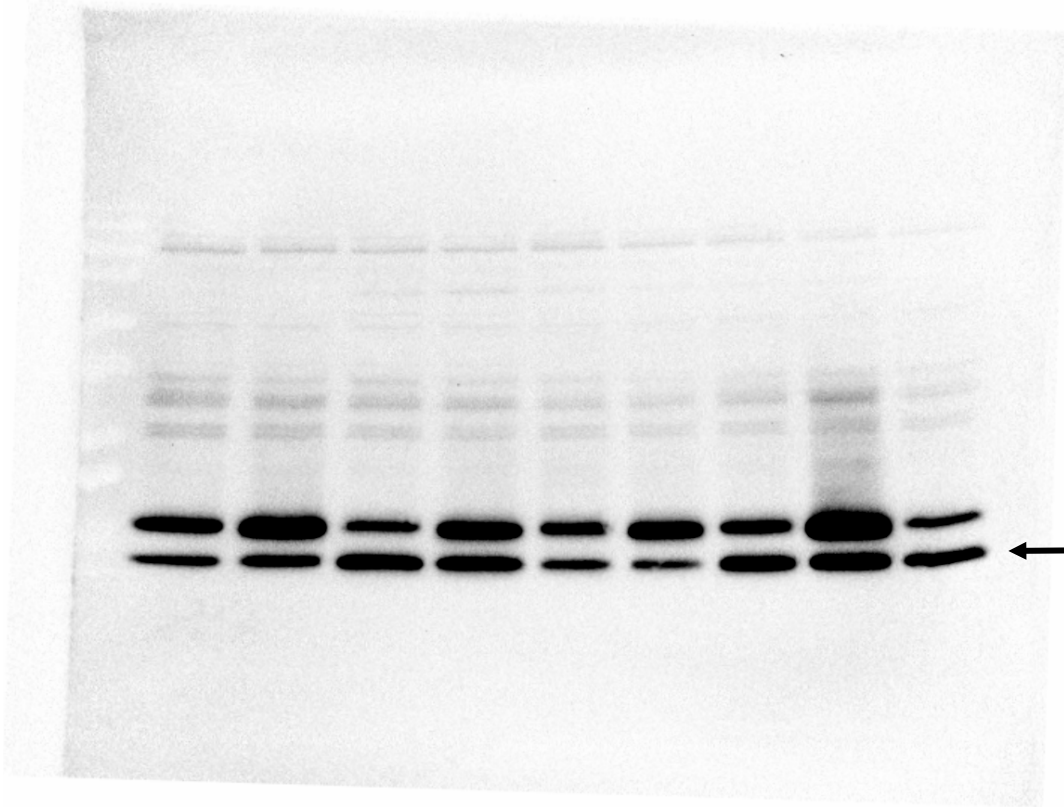

Histone H3  
#4499, Cell Signaling

Figure 1A

# Full unedited gel for Figure 1A

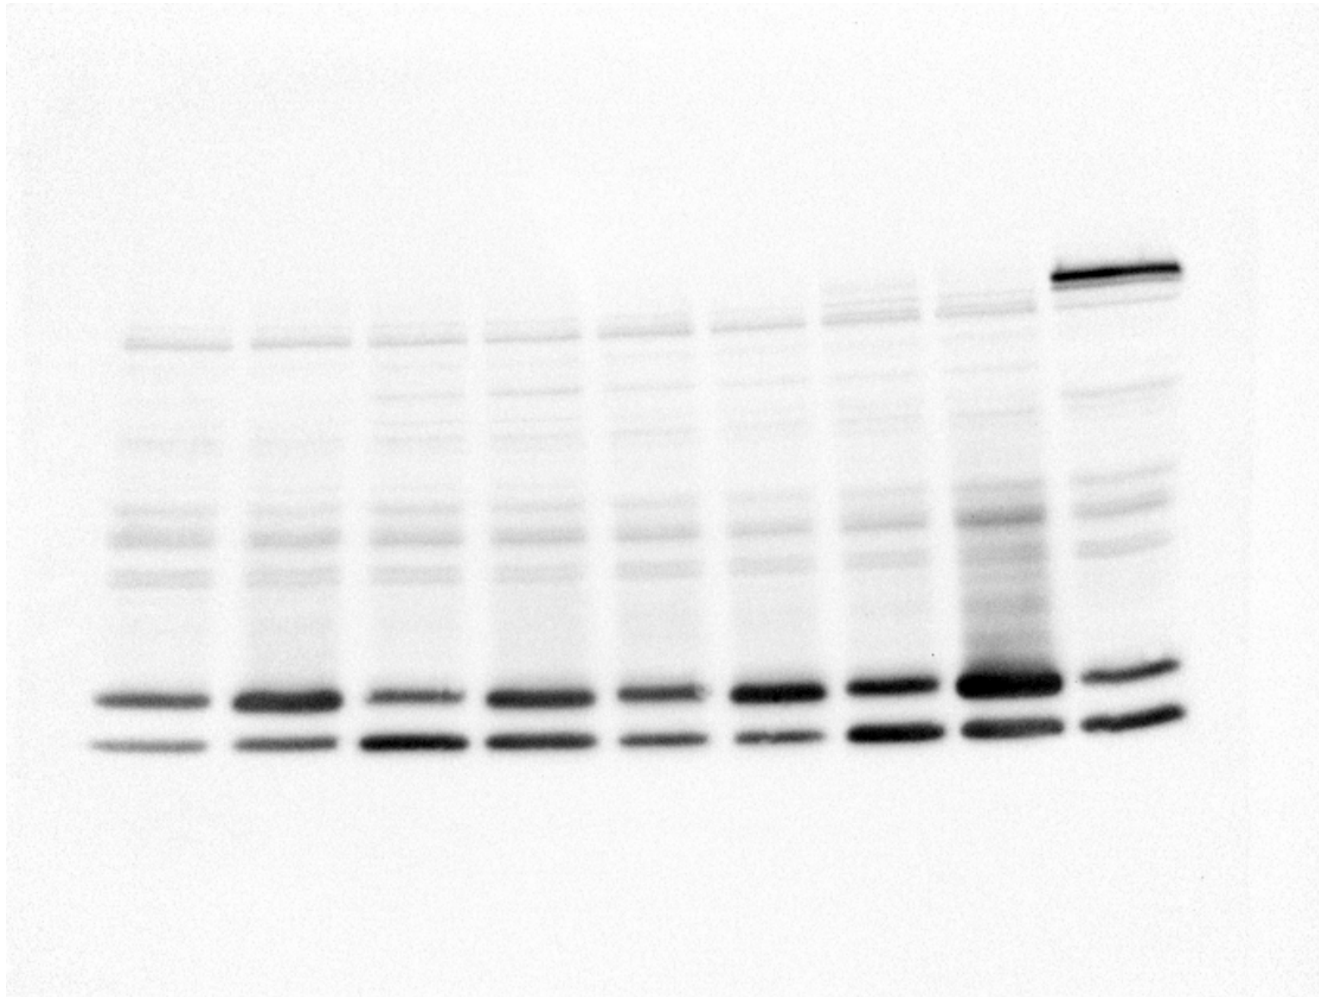

← AXL  
138 kDa  
(Cell Signaling, 8661s, 1:1000)

AXL was run in an additional cell line (1205Lu) cells as a positive control. This shows that the absence of AXL bands in the other cell lines is due to the biology and not the quality of the antibody.

Figure 1A

# Full unedited gel for Figure 1A

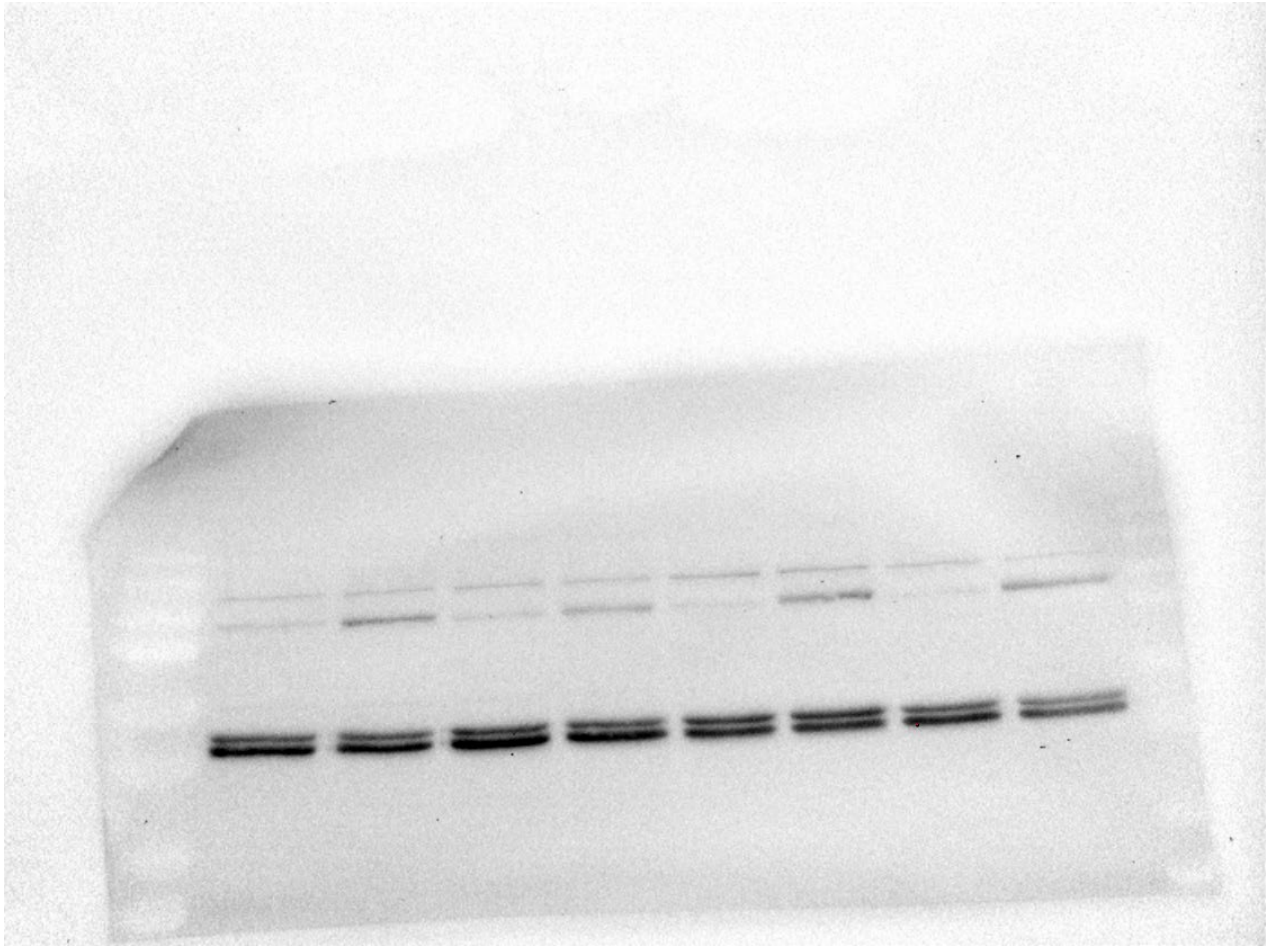

← Cleaved PARP  
89 kDa  
(Cell Signaling, 9541s, 1:1000)

Figure 1A

# Full unedited gel for Figure 1A

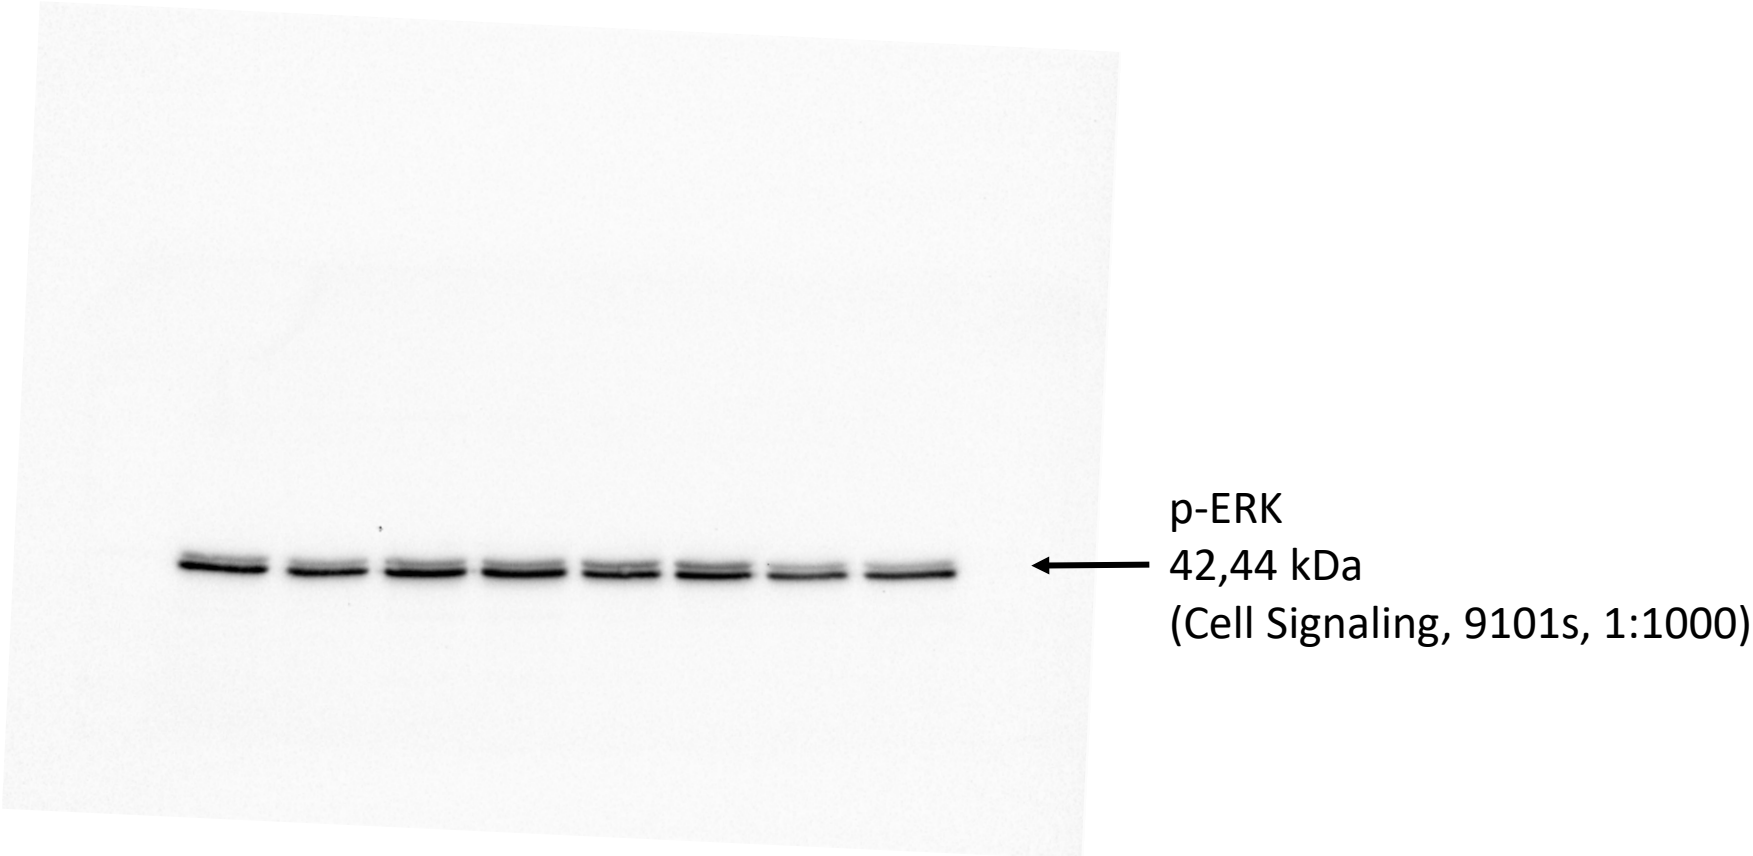

Figure 1A

# Full unedited gel for Figure 1A

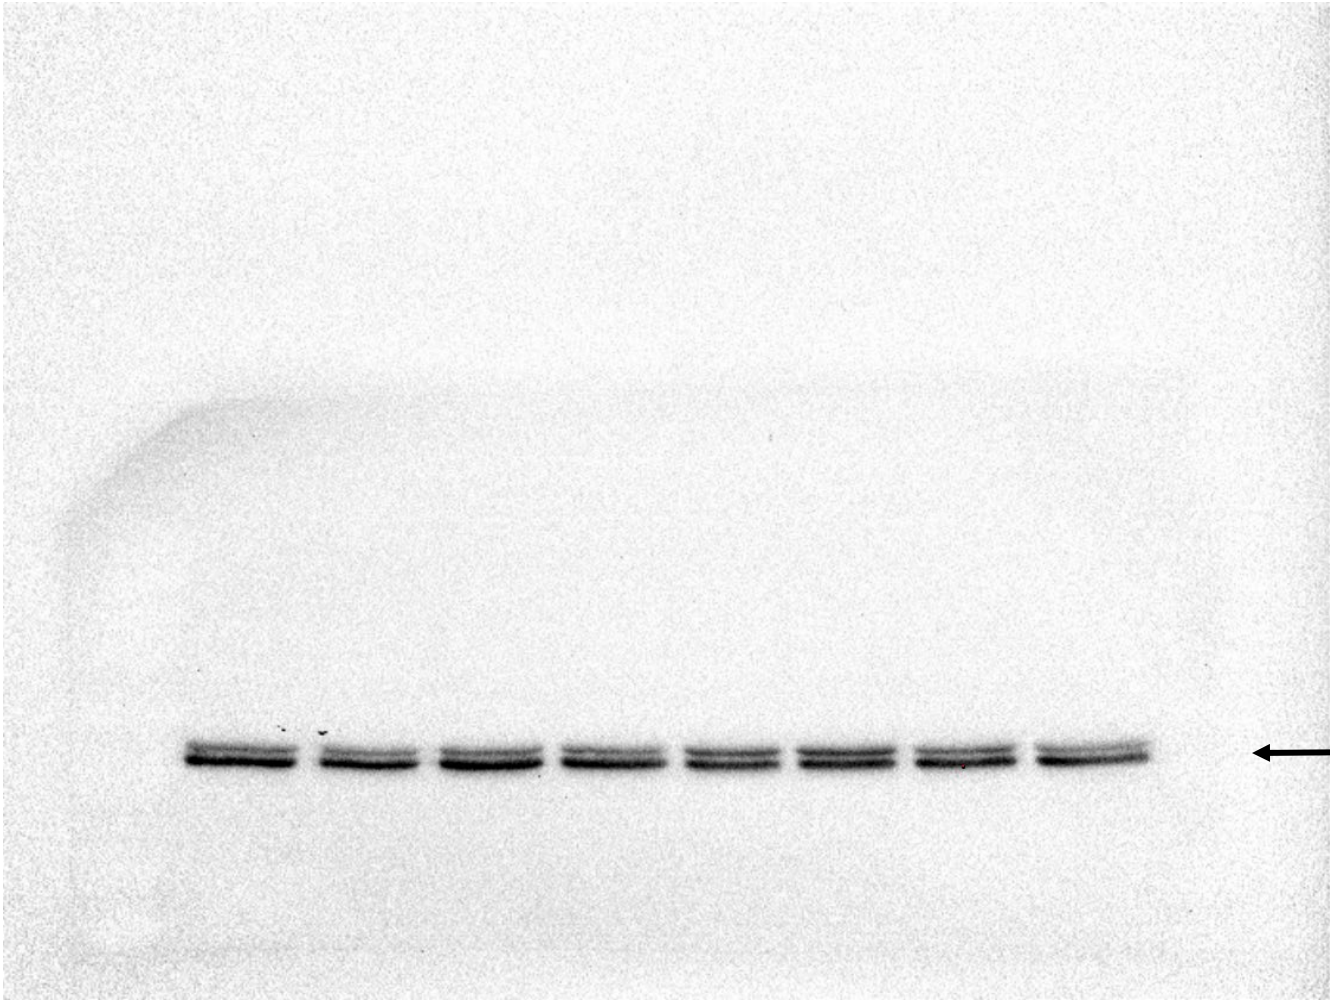

ERK – p44/42 MAPK  
42,44 kDa  
(Cell Signaling, 9102s, 1:1000)

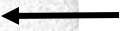

Figure 1A

# Full unedited gel for Figure 1A

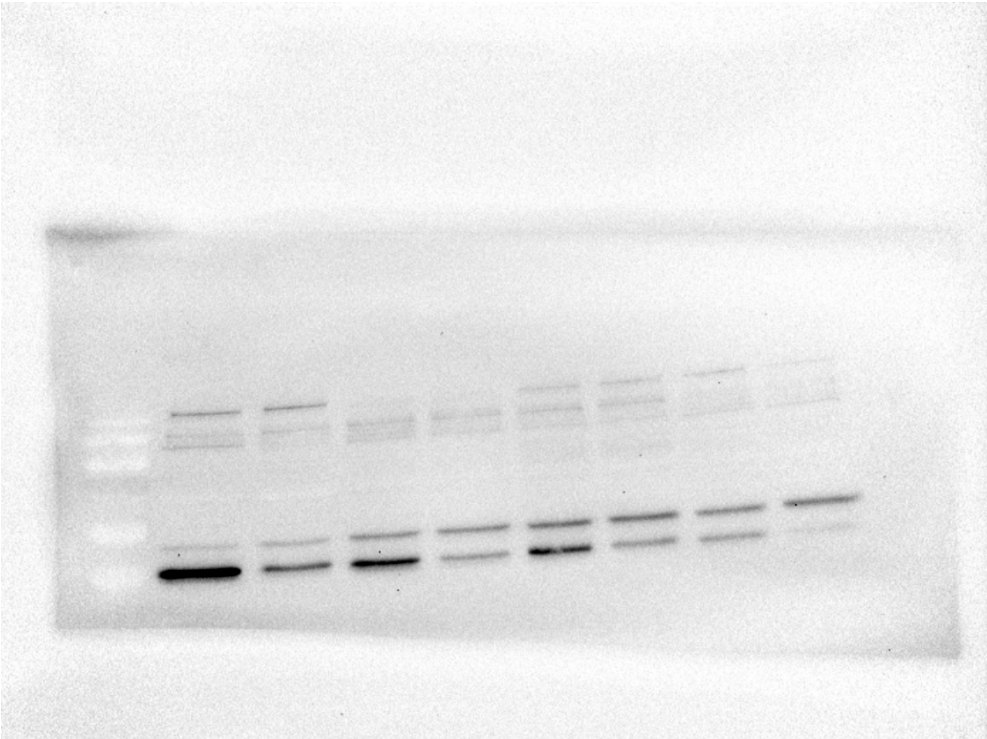

← pMEK1/2  
45 kDa  
(Cell Signaling, 9121, 1:1000)

Figure 1A



# Full unedited gel for Figure 1A

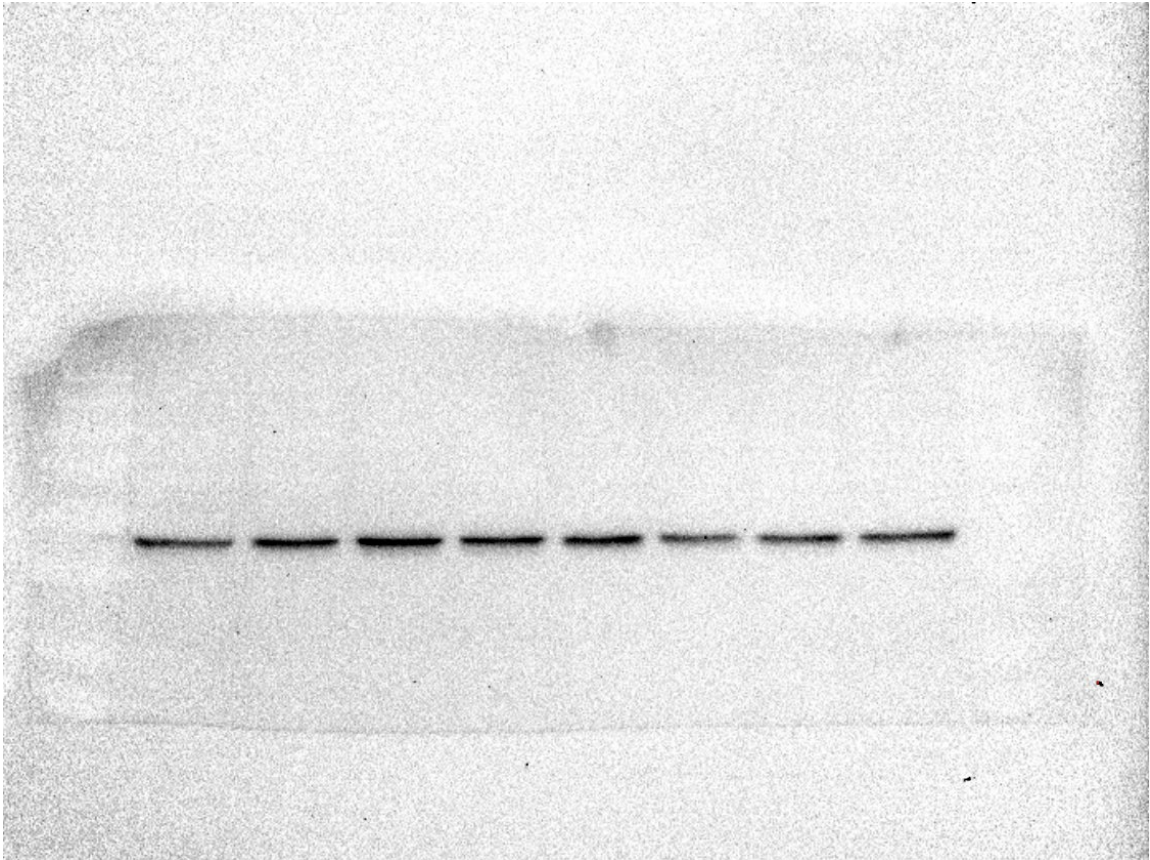

← MEK  
45 kDa  
(Cell Signaling, 9122, 1:1000)

Figure 1A

# Full unedited gel for Figure 1A

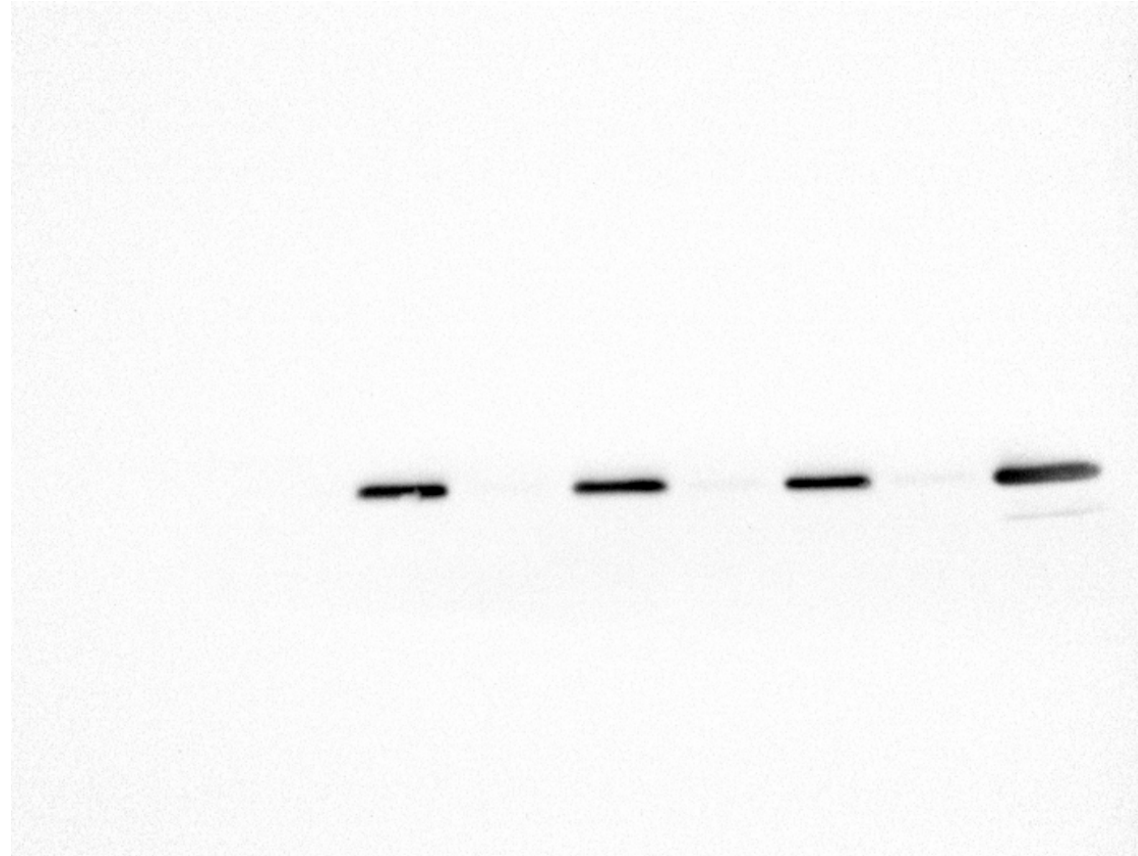

← H3K27ac  
15 kDa  
(Abcam, ab4729, 1:1000)

Figure 1A

# Full unedited gel for Figure 1A

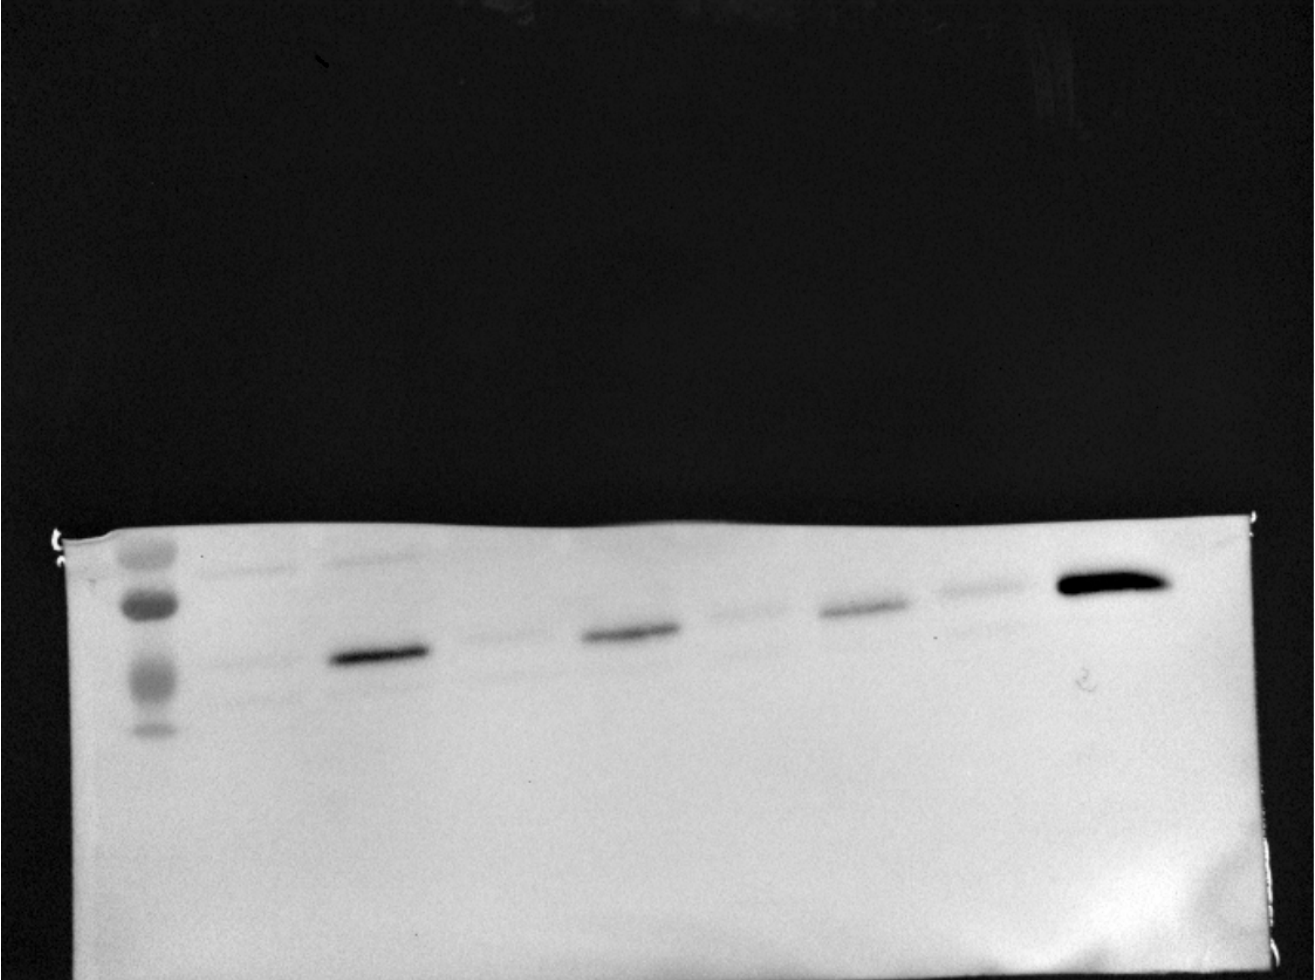

← H3K4me2  
18 kDa  
(Abcam, ab32356, 1:5000)

Figure 1A

# Full unedited gel for Figure 1A

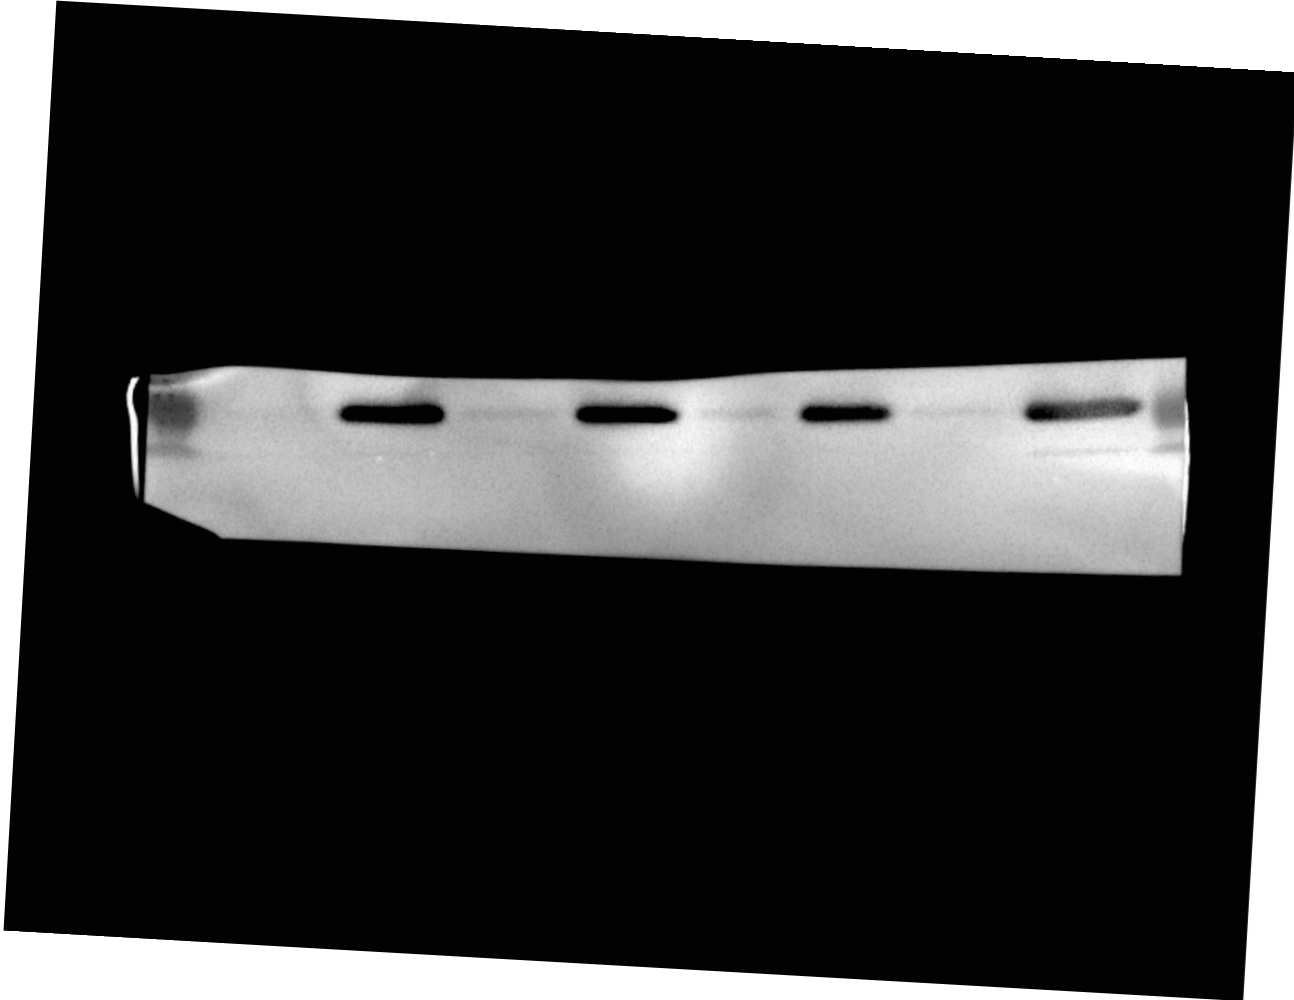

← H3K9ac  
18 kDa  
(Abcam, ab32129, 1:1000)

Figure 1A

# Full unedited gel for Figure 1A

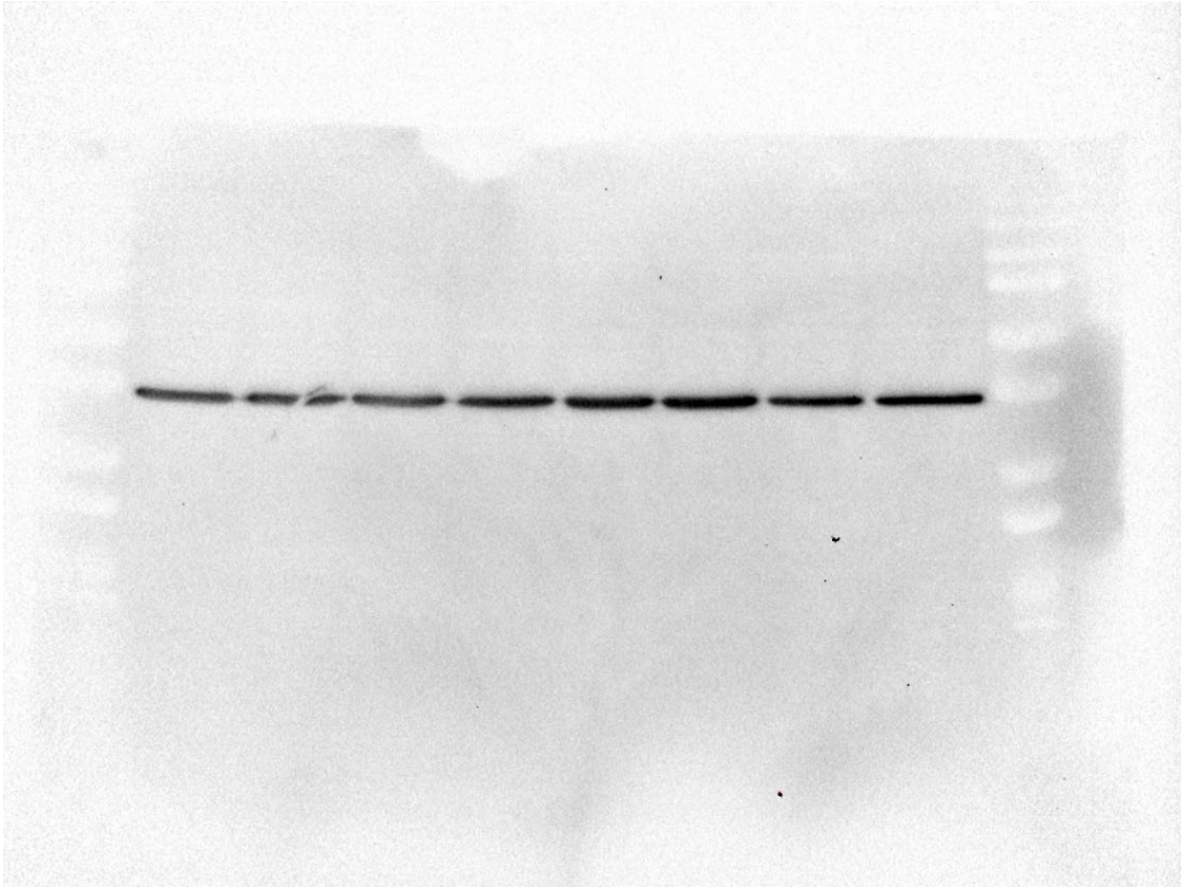

← GAPDH  
36 kDa  
(Cell Signaling, 2118L, 1:2000)

Figure 1A

# Full unedited gel for Figure 1B

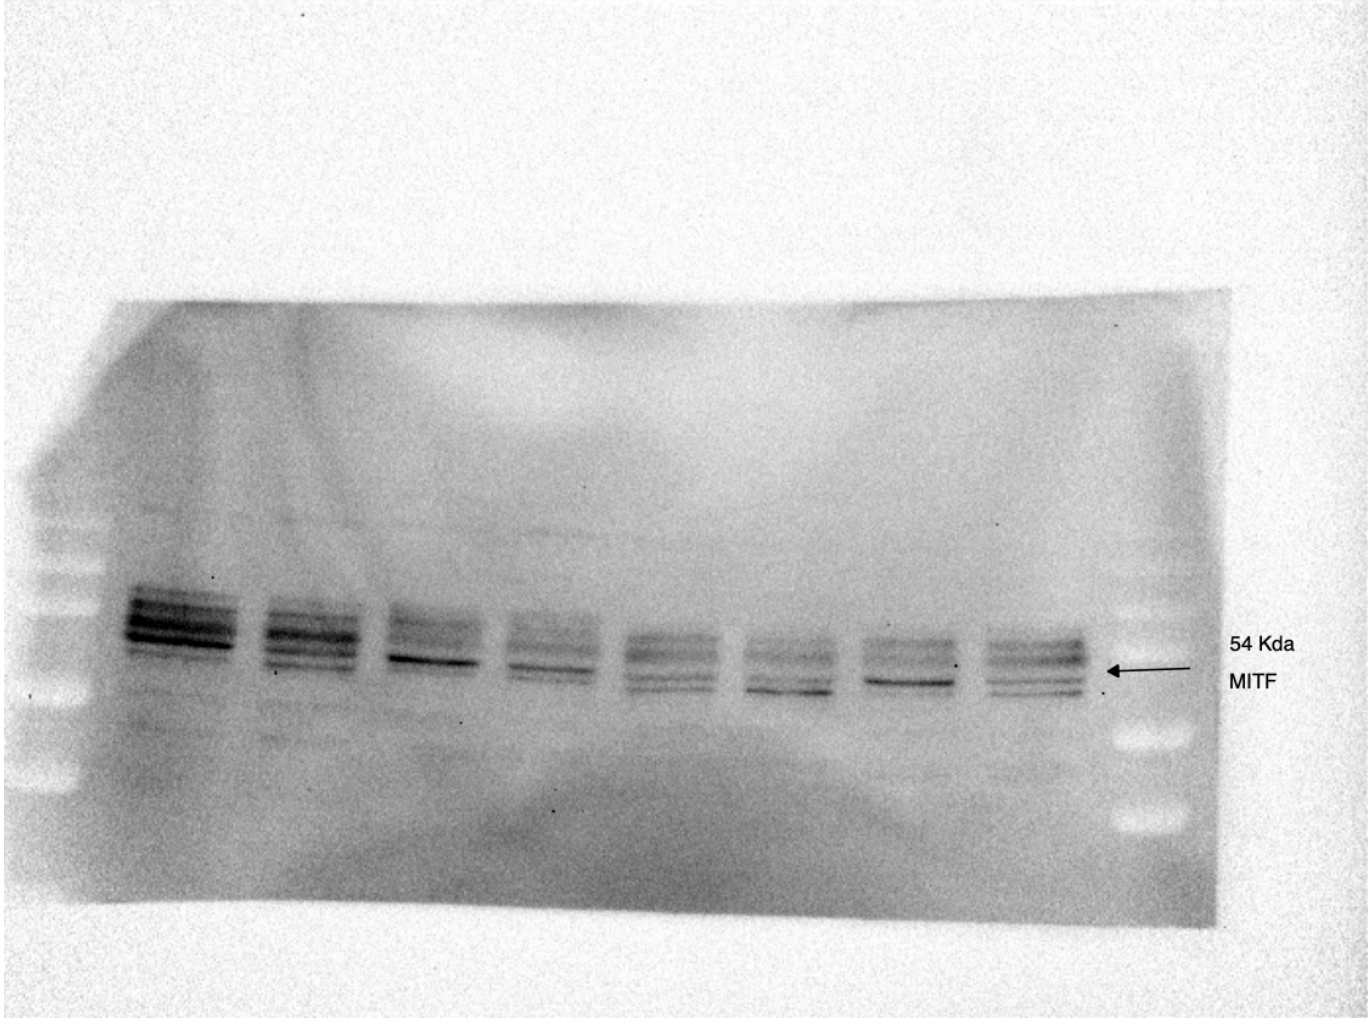

Figure 1B

(Cell Signaling, 12590s, 1:1000)

# Full unedited gel for Figure 1B

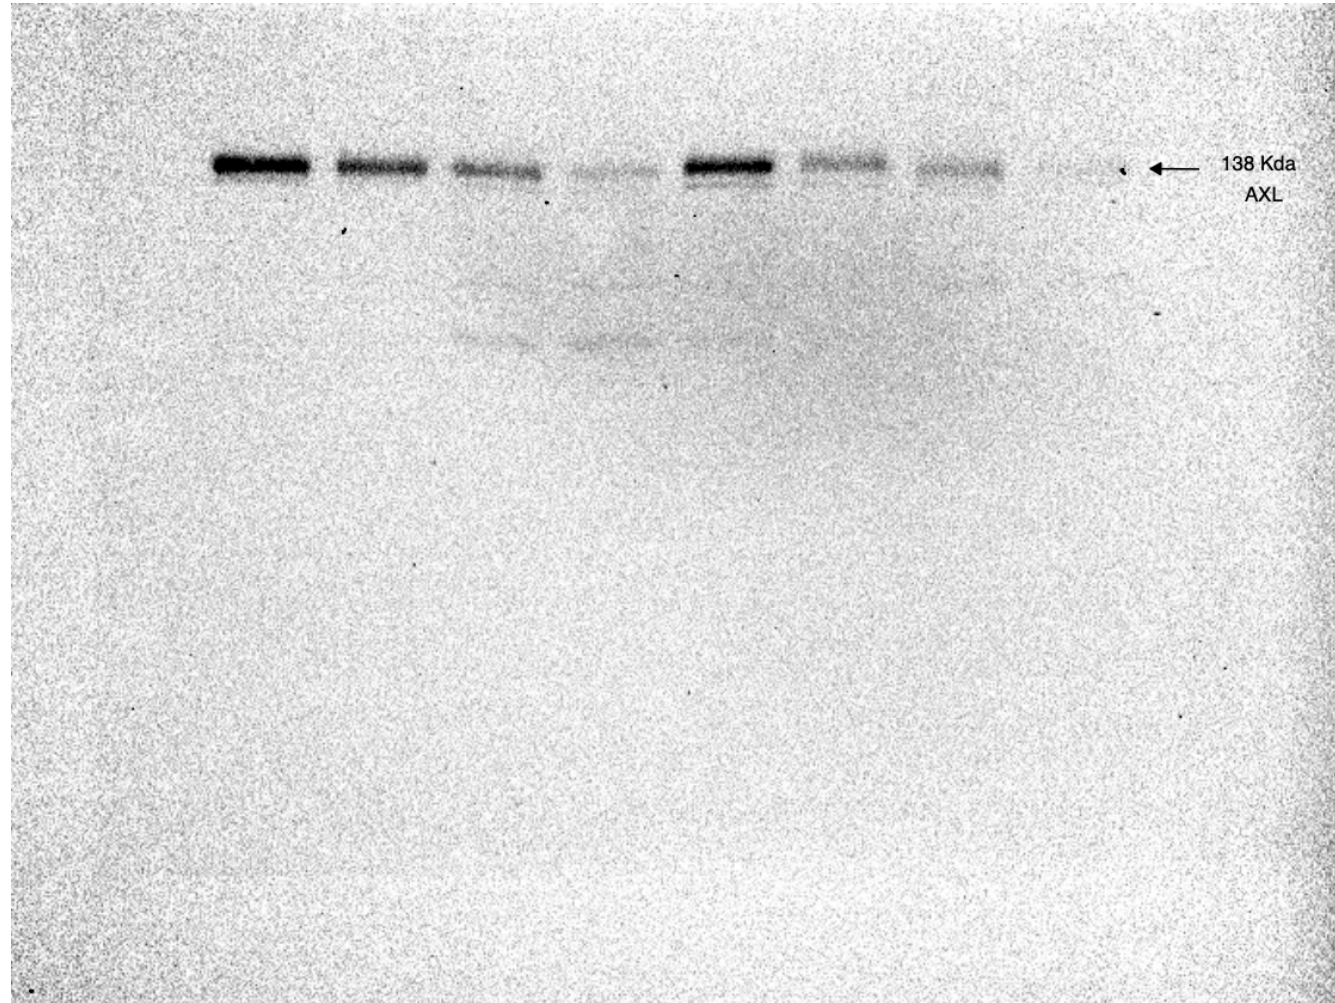

Figure 1B

(Cell Signaling, 8661s, 1:1000)

# Full unedited gel for Figure 1B

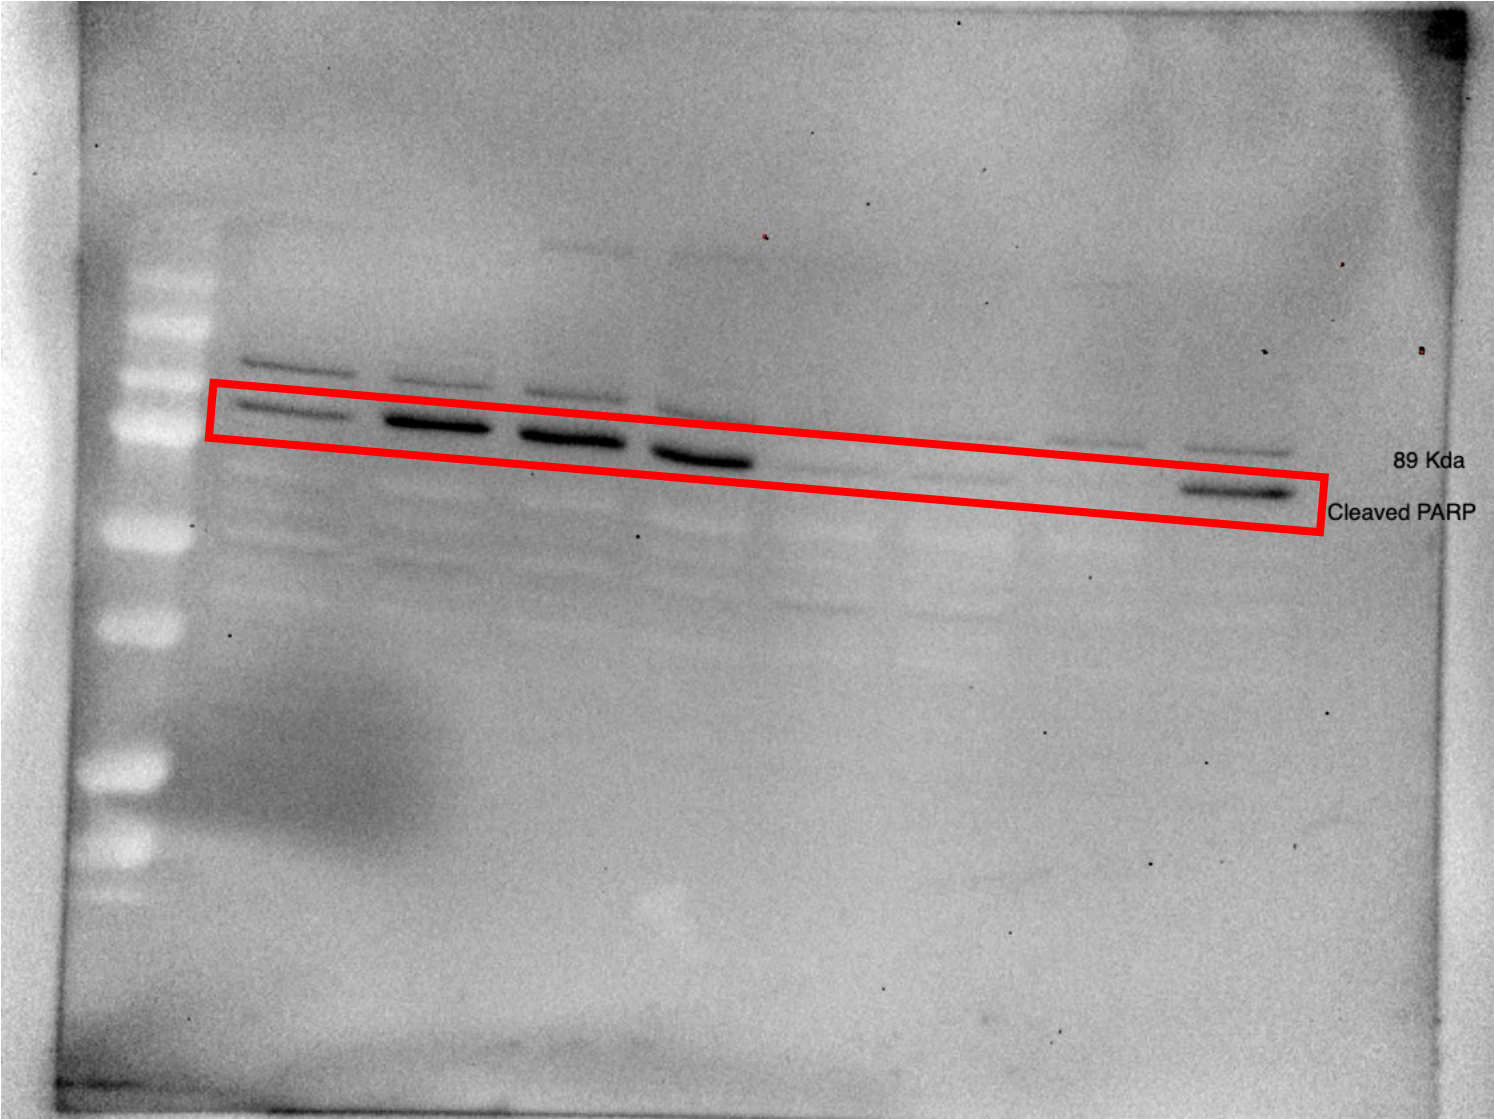

Figure 1B

(Cell Signaling, 9541s, 1:1000)



# Full unedited gel for Figure 1B

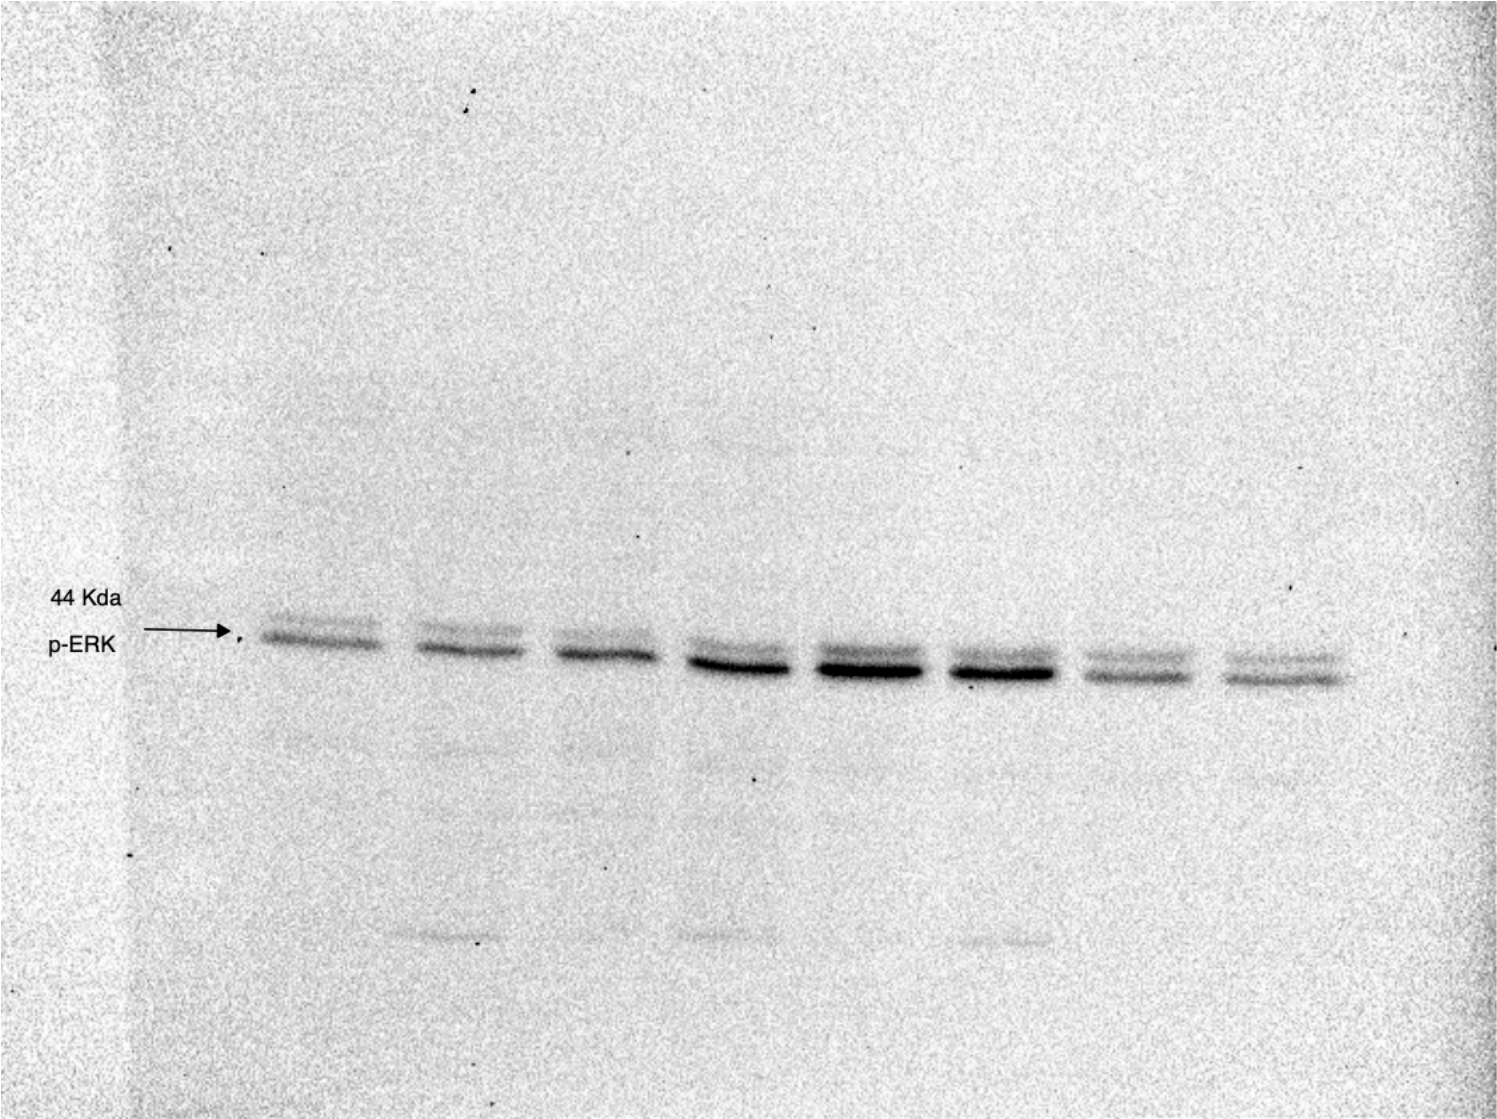

Figure 1B

(Cell Signaling, 9101s, 1:1000)

# Full unedited gel for Figure 1B

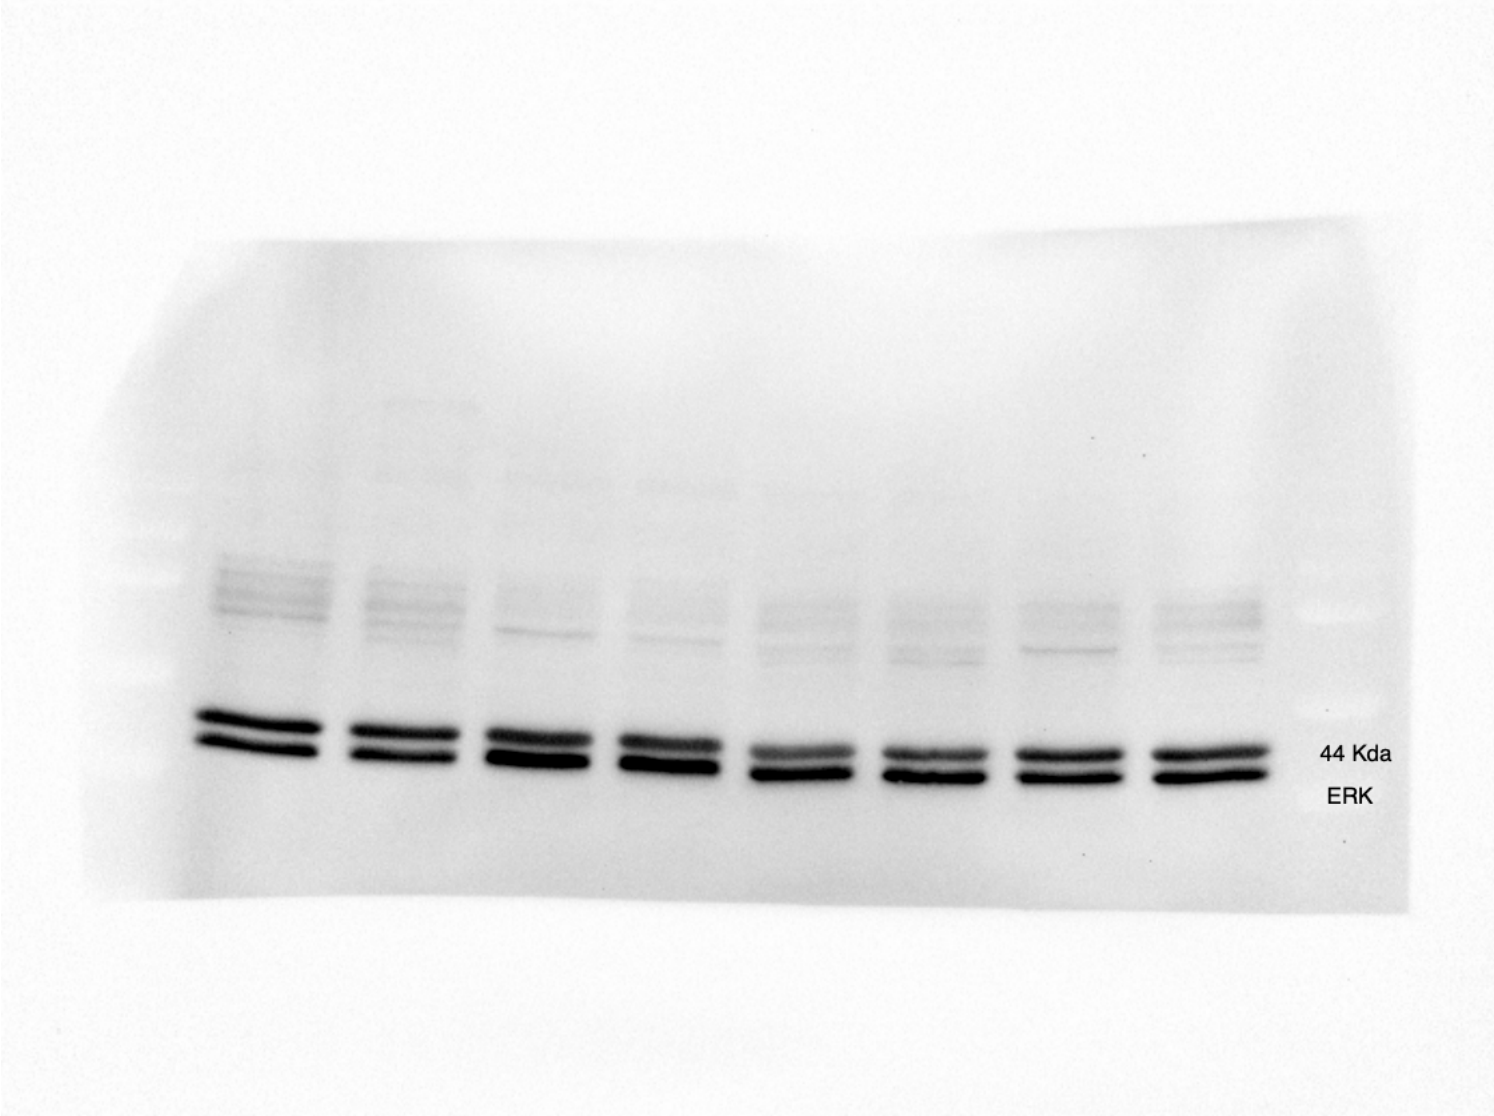

Figure 1B

(Cell Signaling, 9102s, 1:1000)

# Full unedited gel for Figure 1B

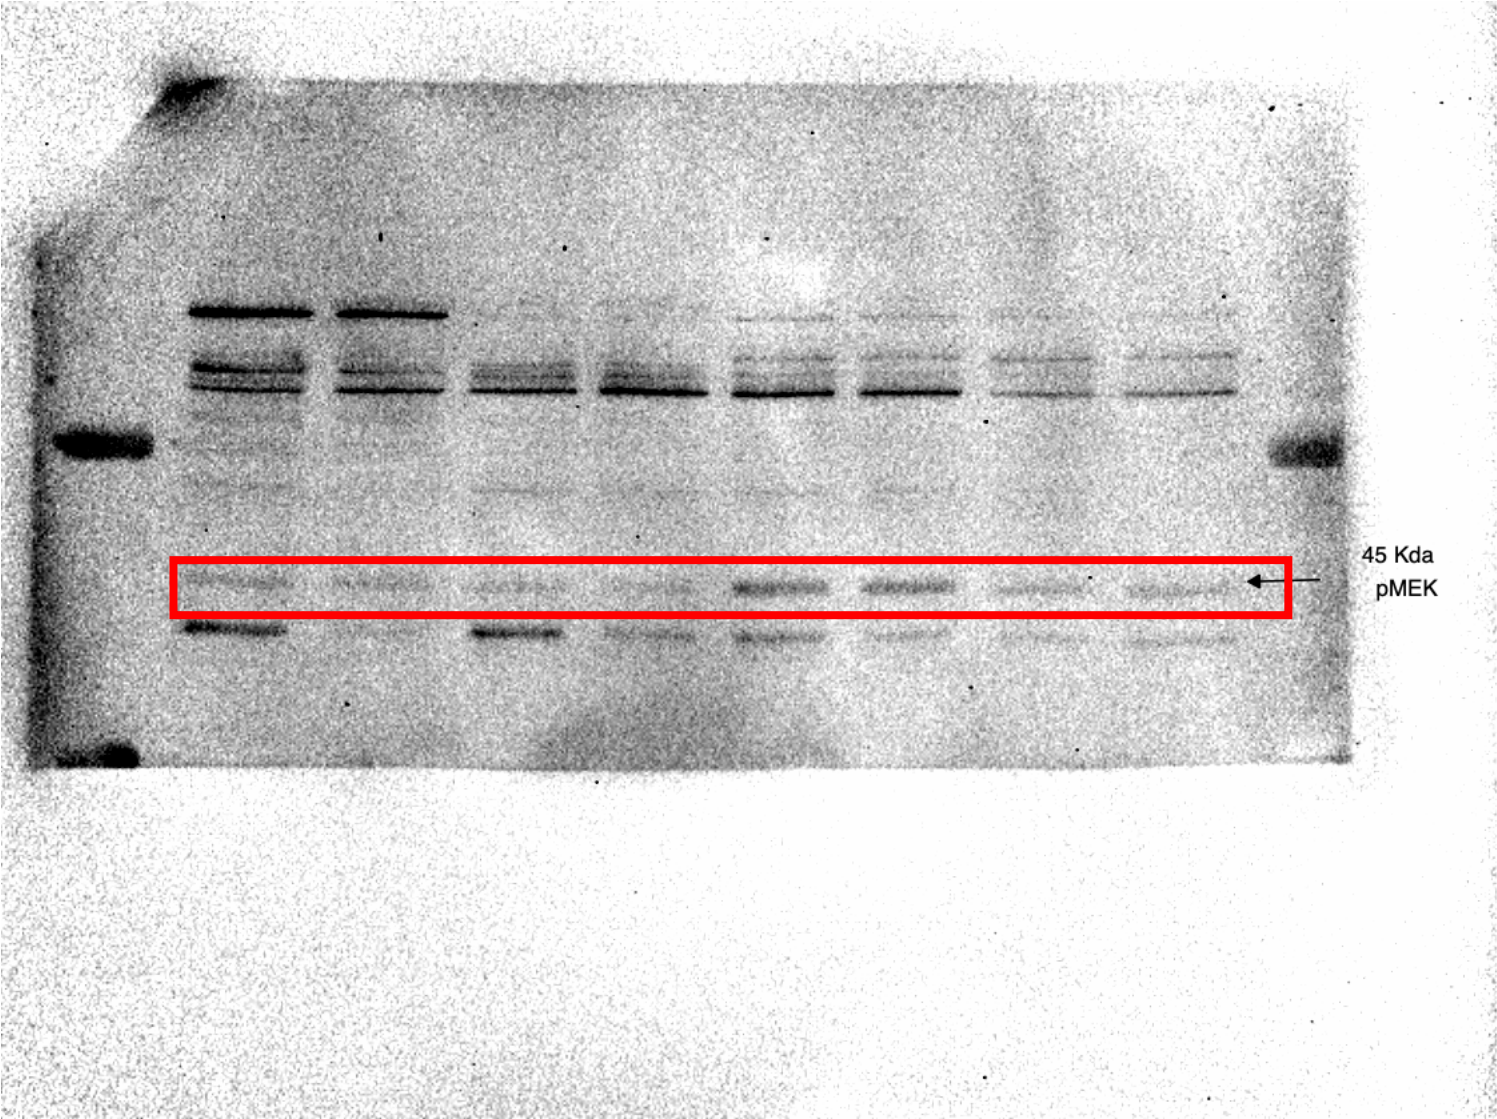

Figure 1B

(Cell Signaling, 9121, 1:1000)

# Full unedited gel for Figure 1B

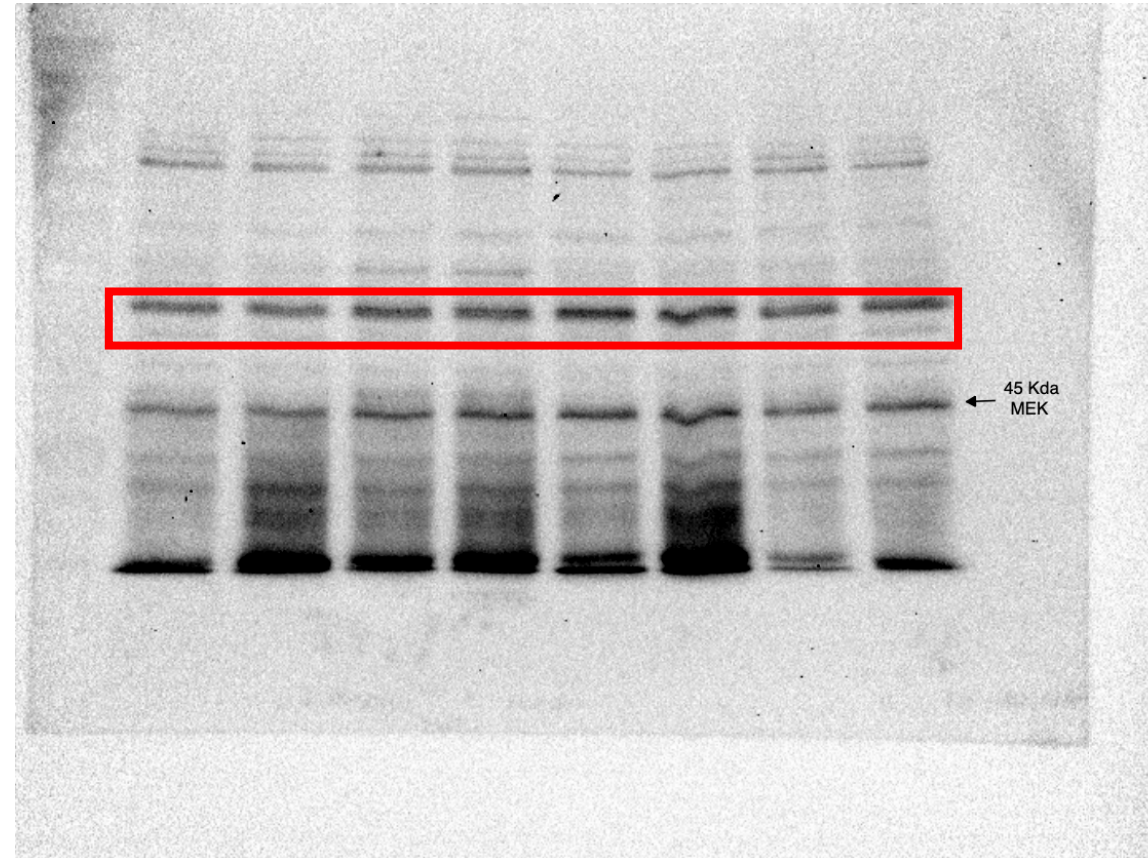

Figure 1B

(Cell Signaling, 9122, 1:1000)

# Full unedited gel for Figure 1B

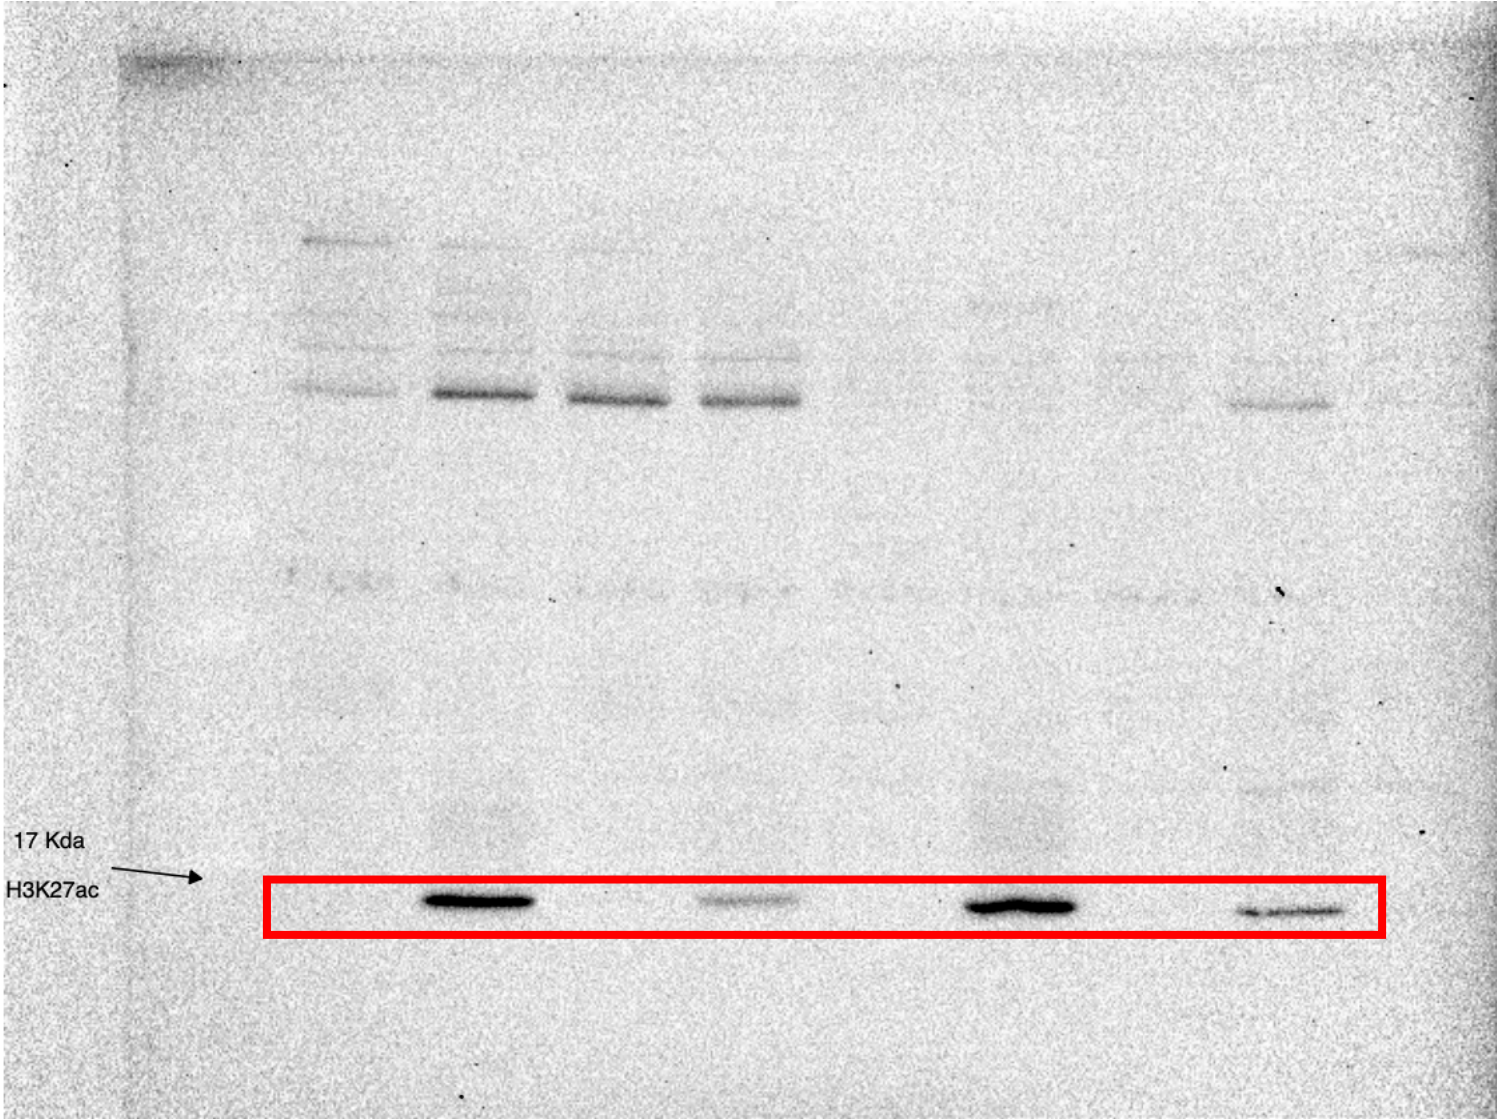

Main Figure 1B

(Abcam, ab4729, 1:1000)

# Full unedited gel for Figure 1B

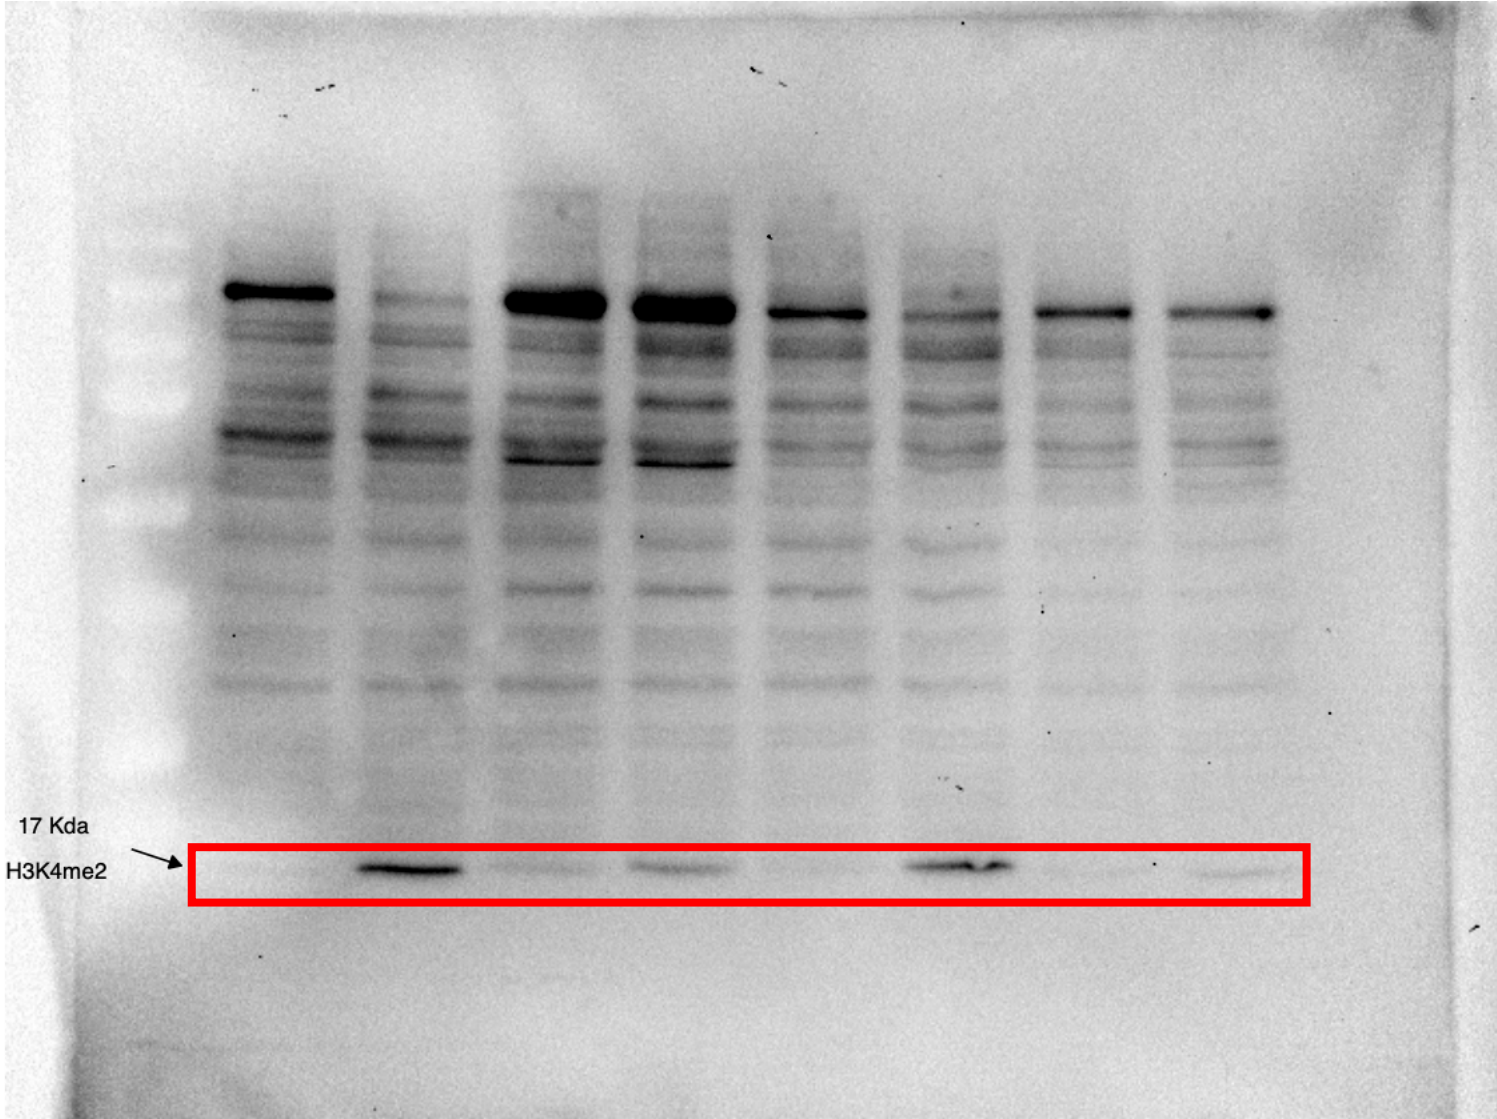

Figure 1B

(Abcam, ab32356, 1:5000)

# Full unedited gel for Figure 1B

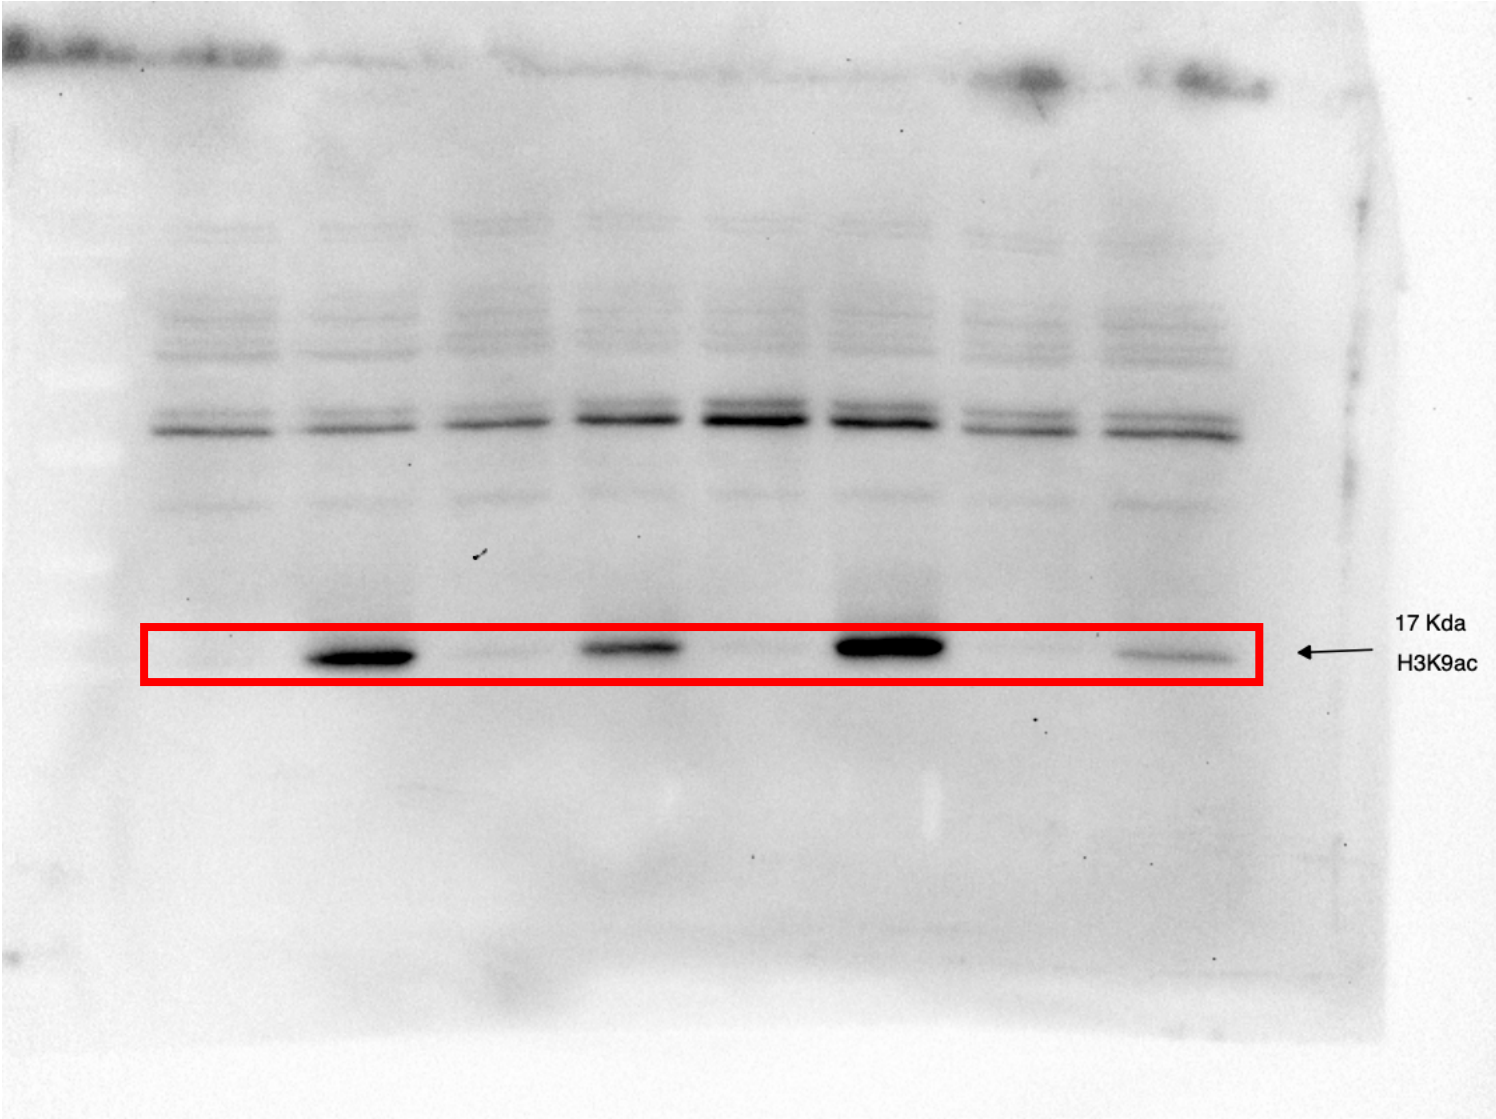

Figure 1B

(Abcam, ab32129, 1:1000)

# Full unedited gel for Figure 1B

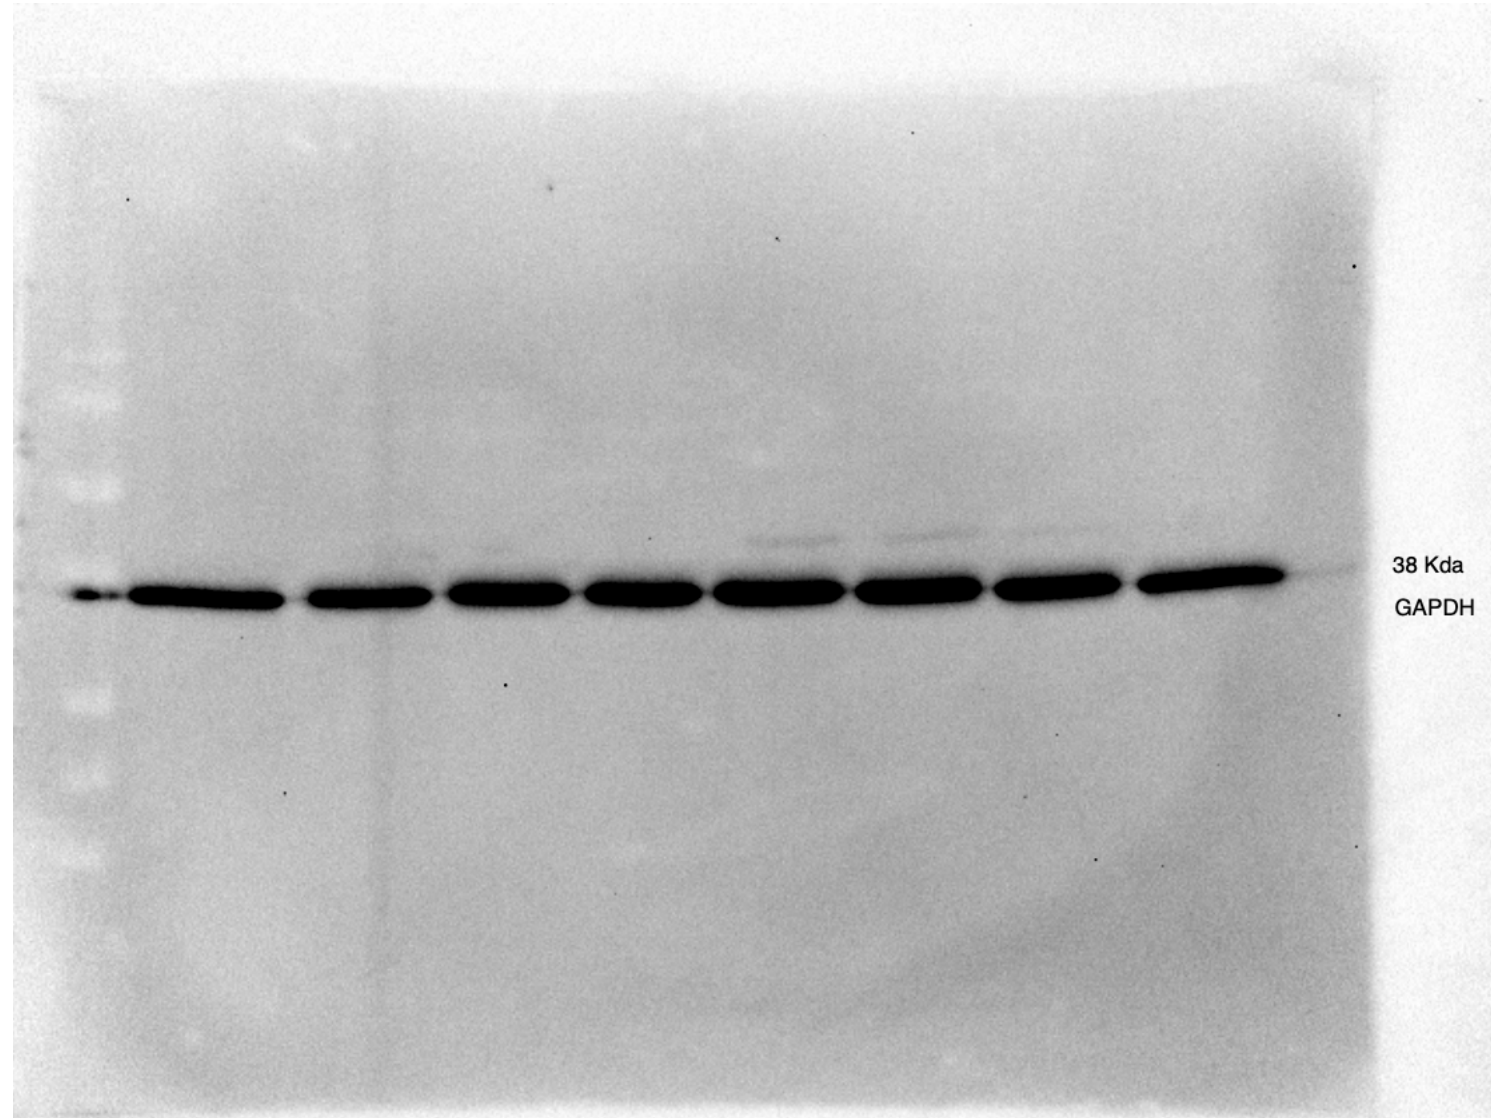

Figure 1B

(Cell Signaling, 2118L, 1:2000)



# Full unedited gel for Figure 9A

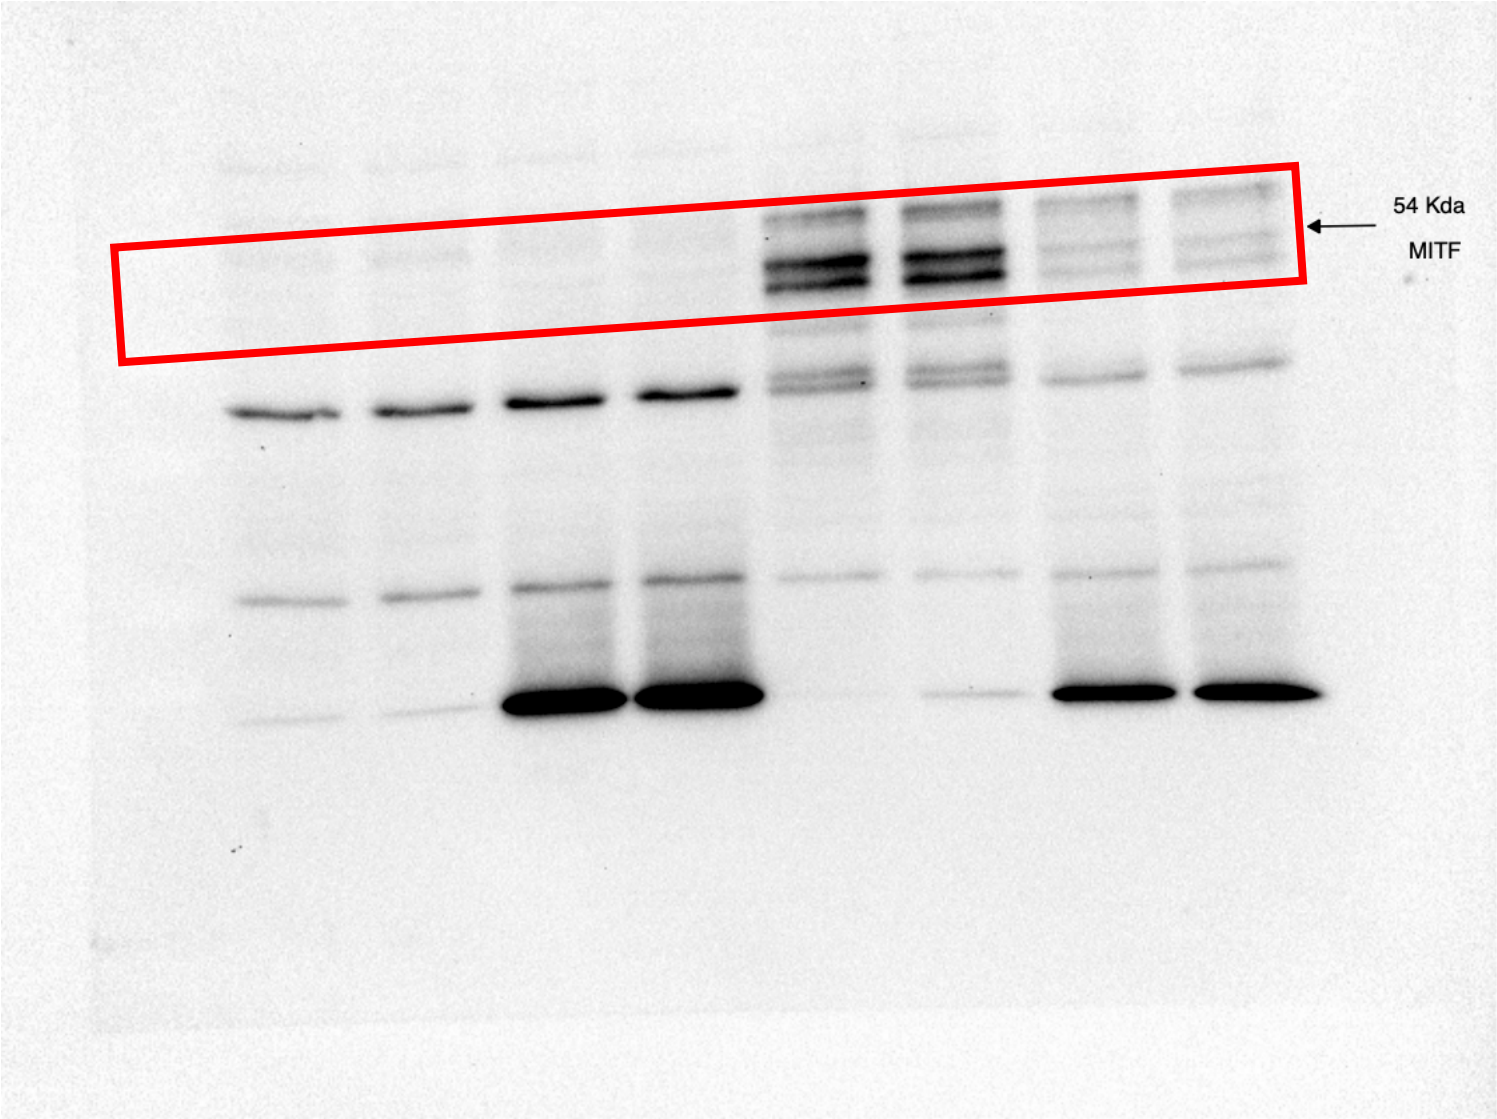

Figure 9A

(MITF, Cell Signaling, 12590s, 1:1000)

# Full unedited gel for Figure 9A

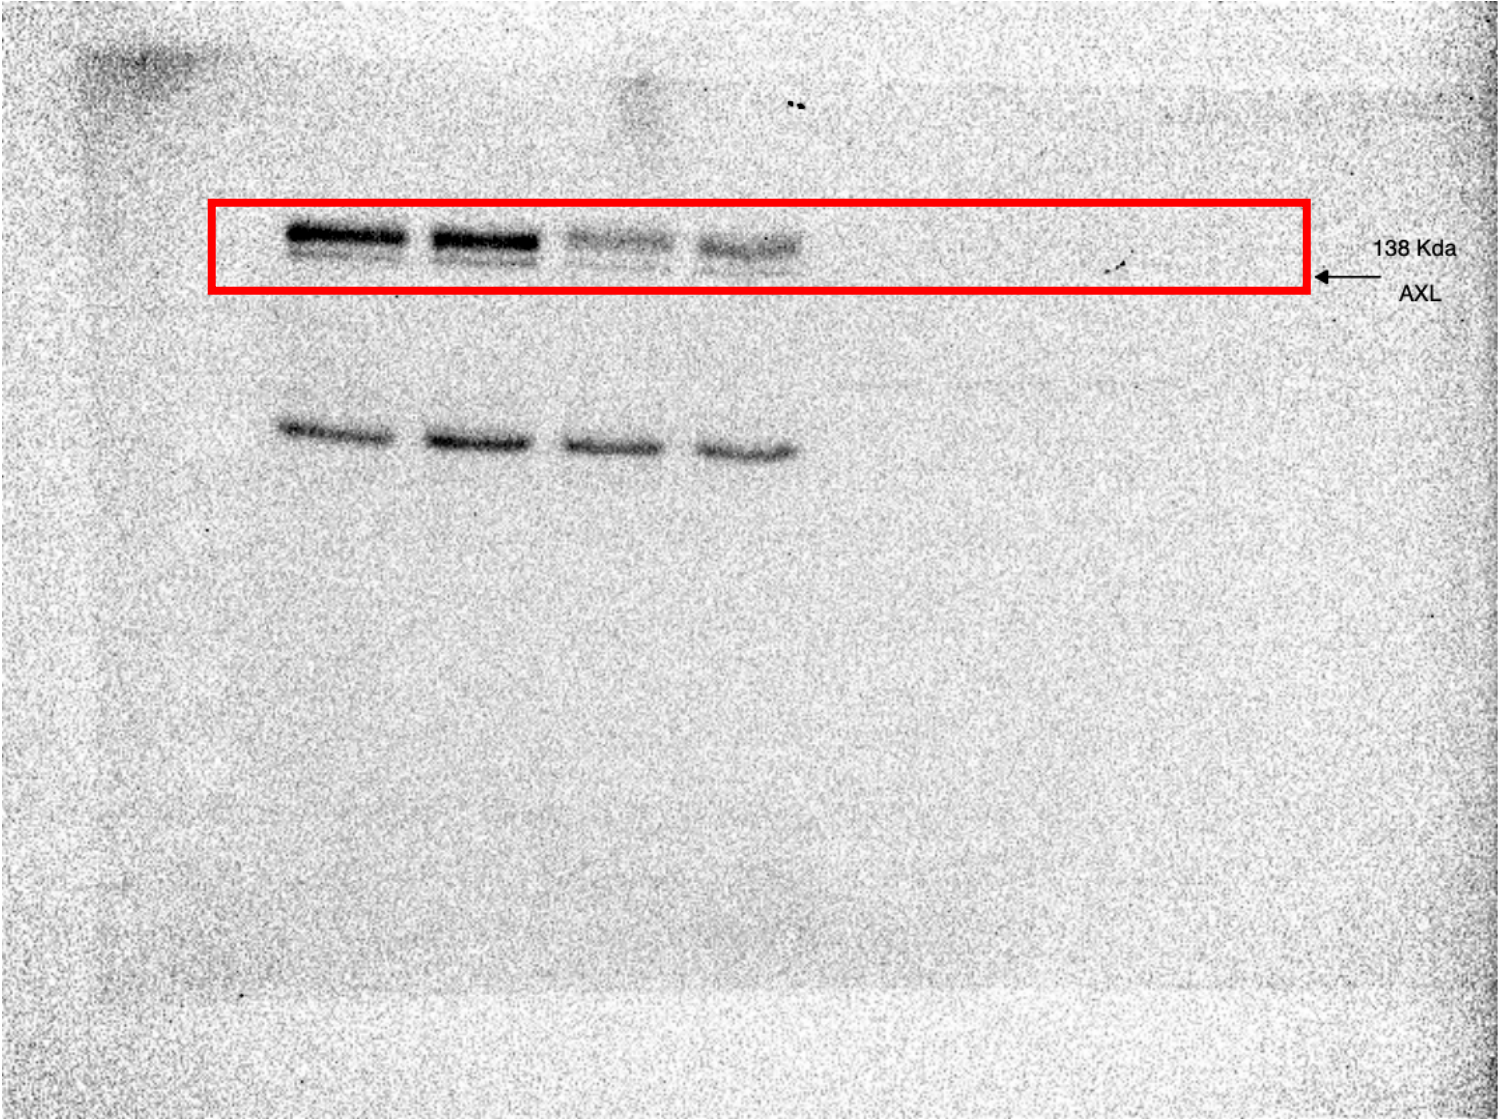

(AXL, Cell Signaling, 8661s, 1:1000)

Figure 9A

# Full unedited gel for Figure 9A

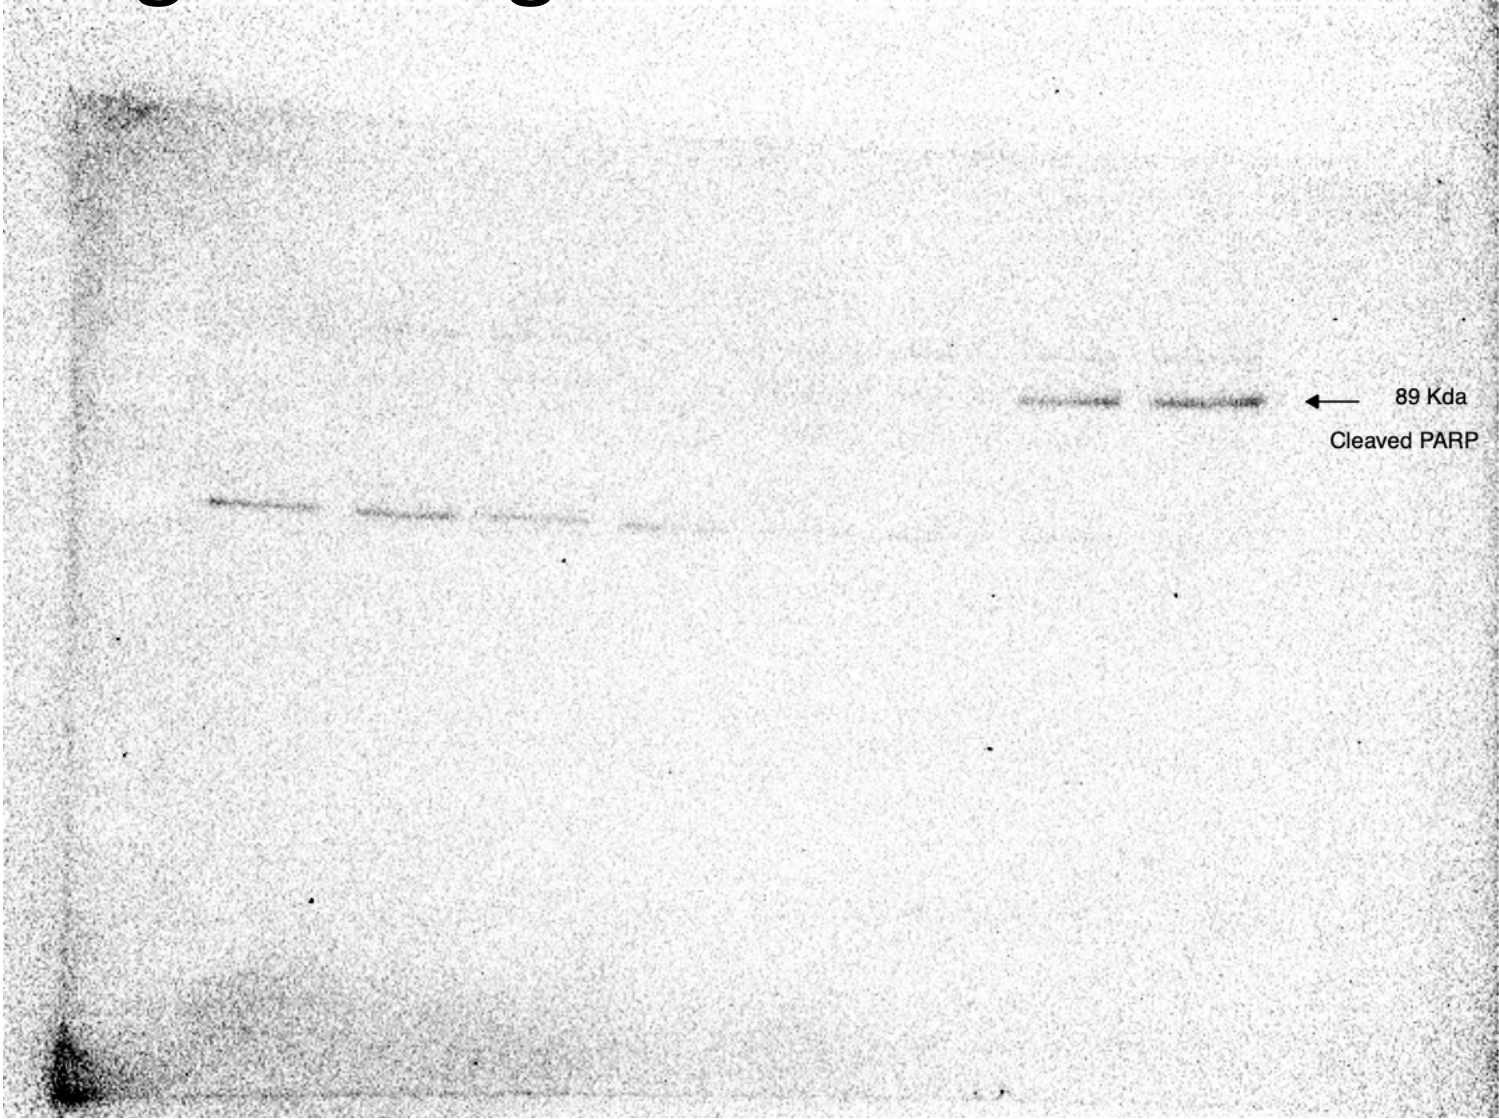

(Cleaved PARP,  
Cell Signaling,  
9541s, 1:1000)

Figure 9A

# Full unedited gel for Figure 9A

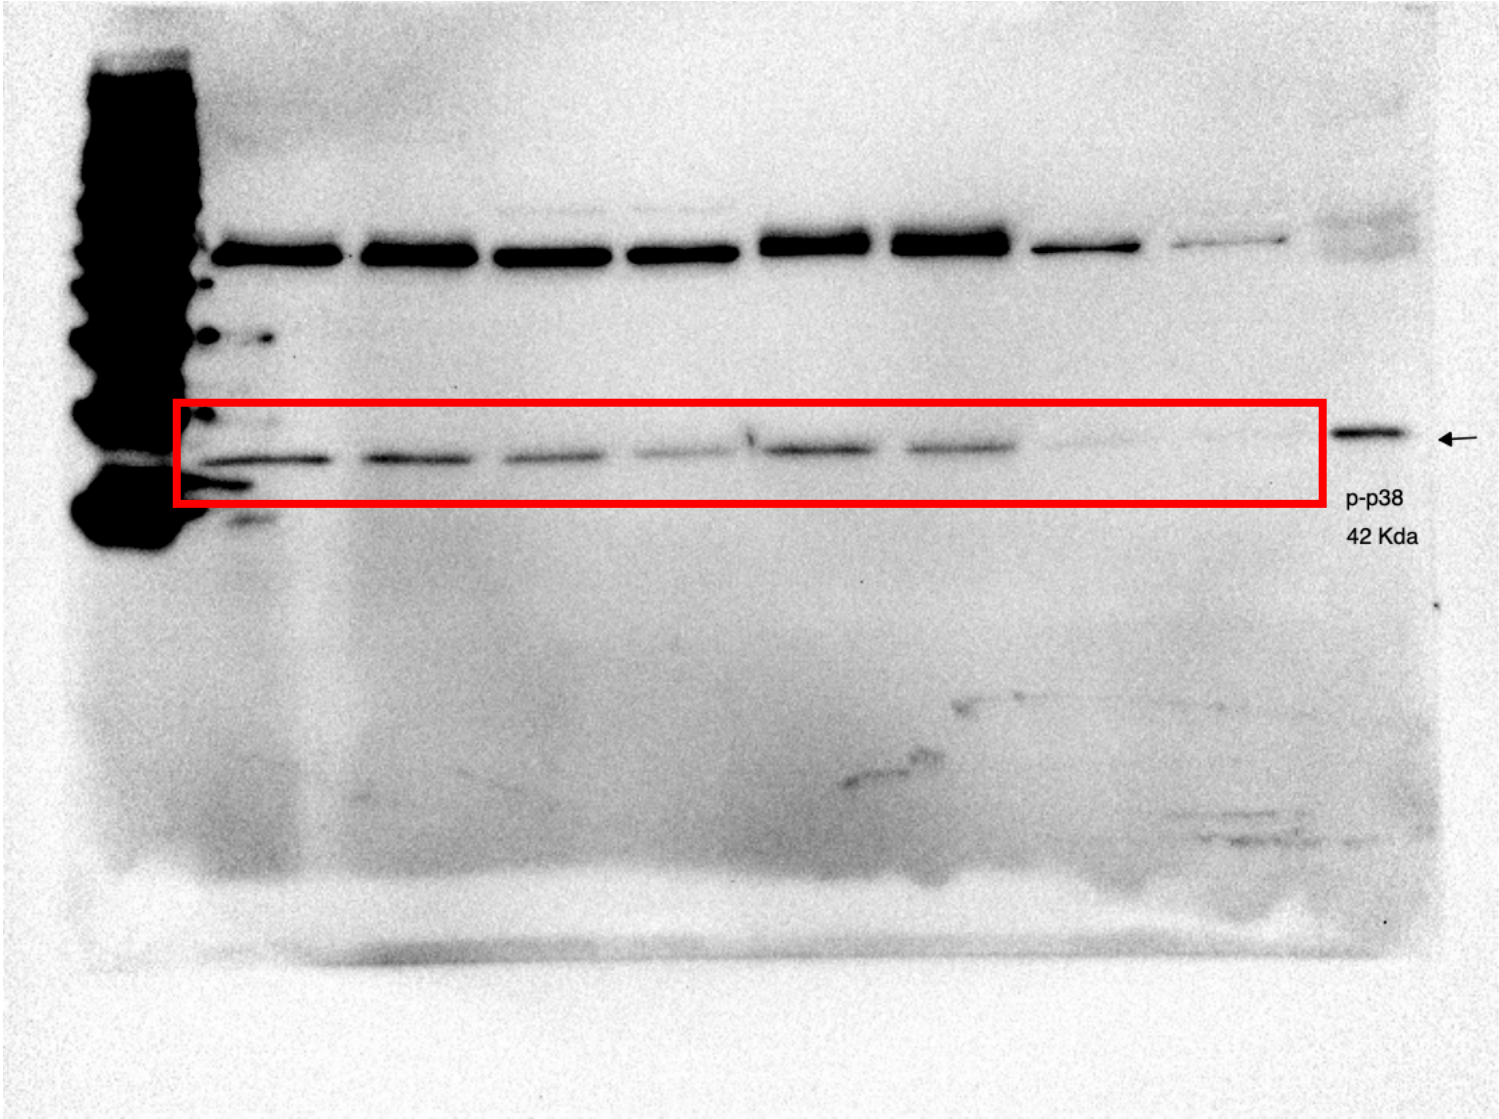

Figure 9A

(p-p38, Cell Signaling, 4631s, 1:1000 )

# Full unedited gel for Figure 9A

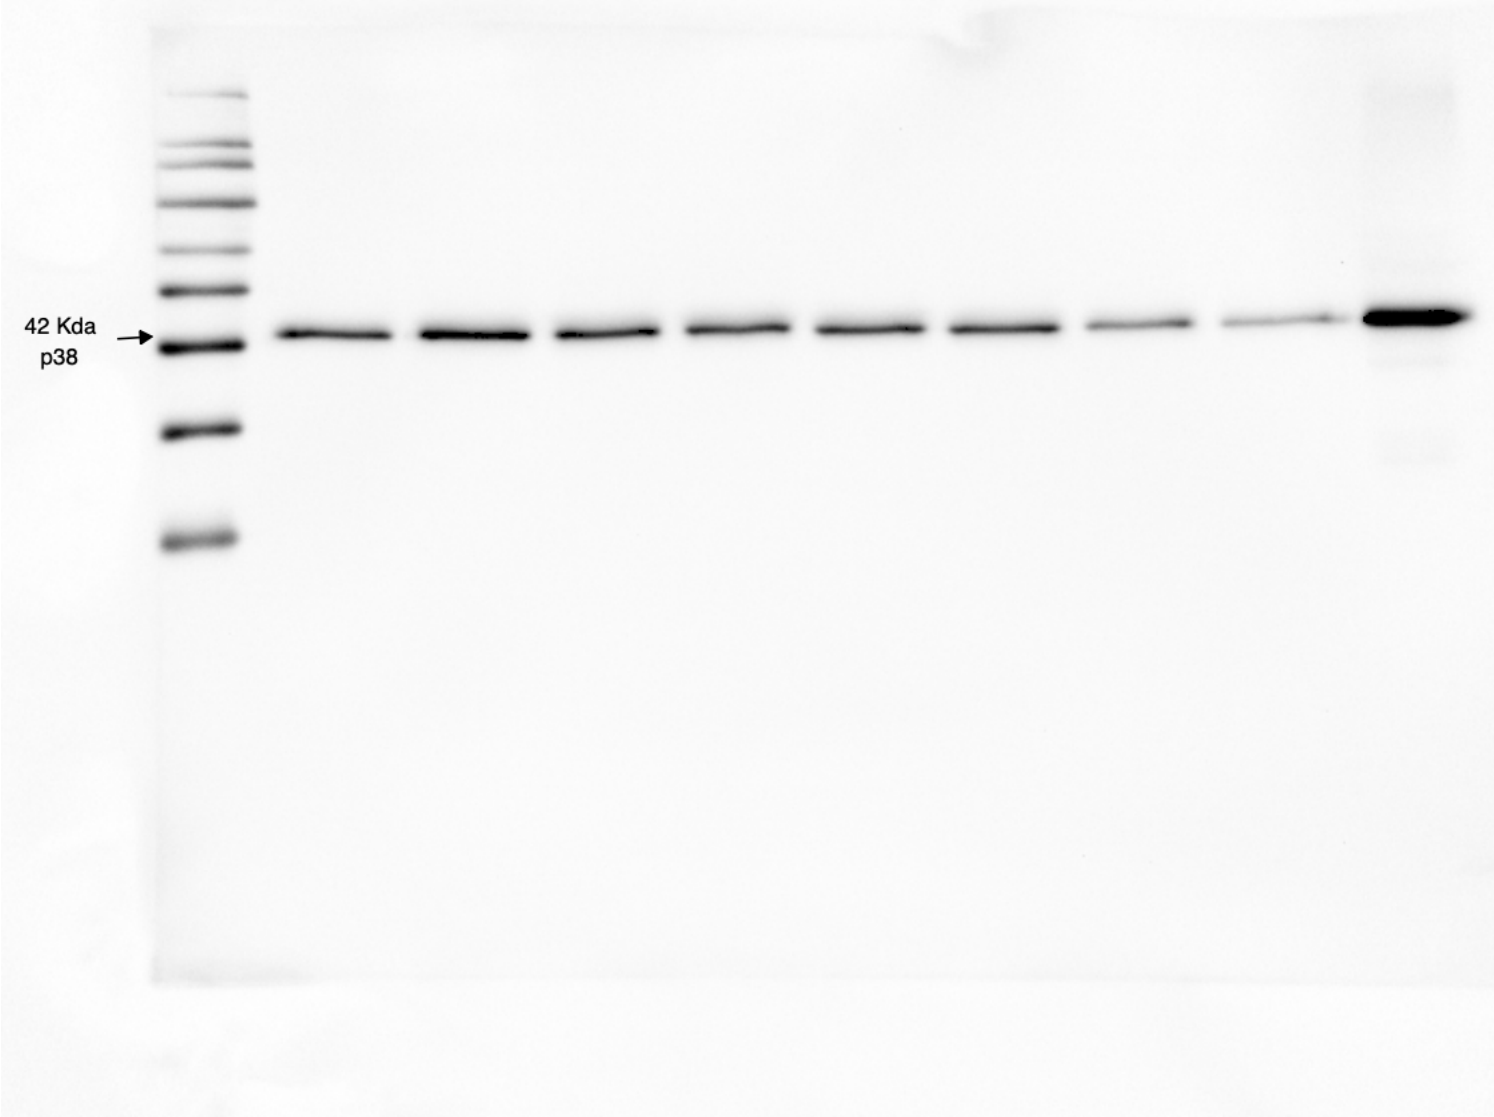

Figure 9A

(p38, Cell Signaling, 9212s, 1:1000 )

# Full unedited gel for Figure 9A

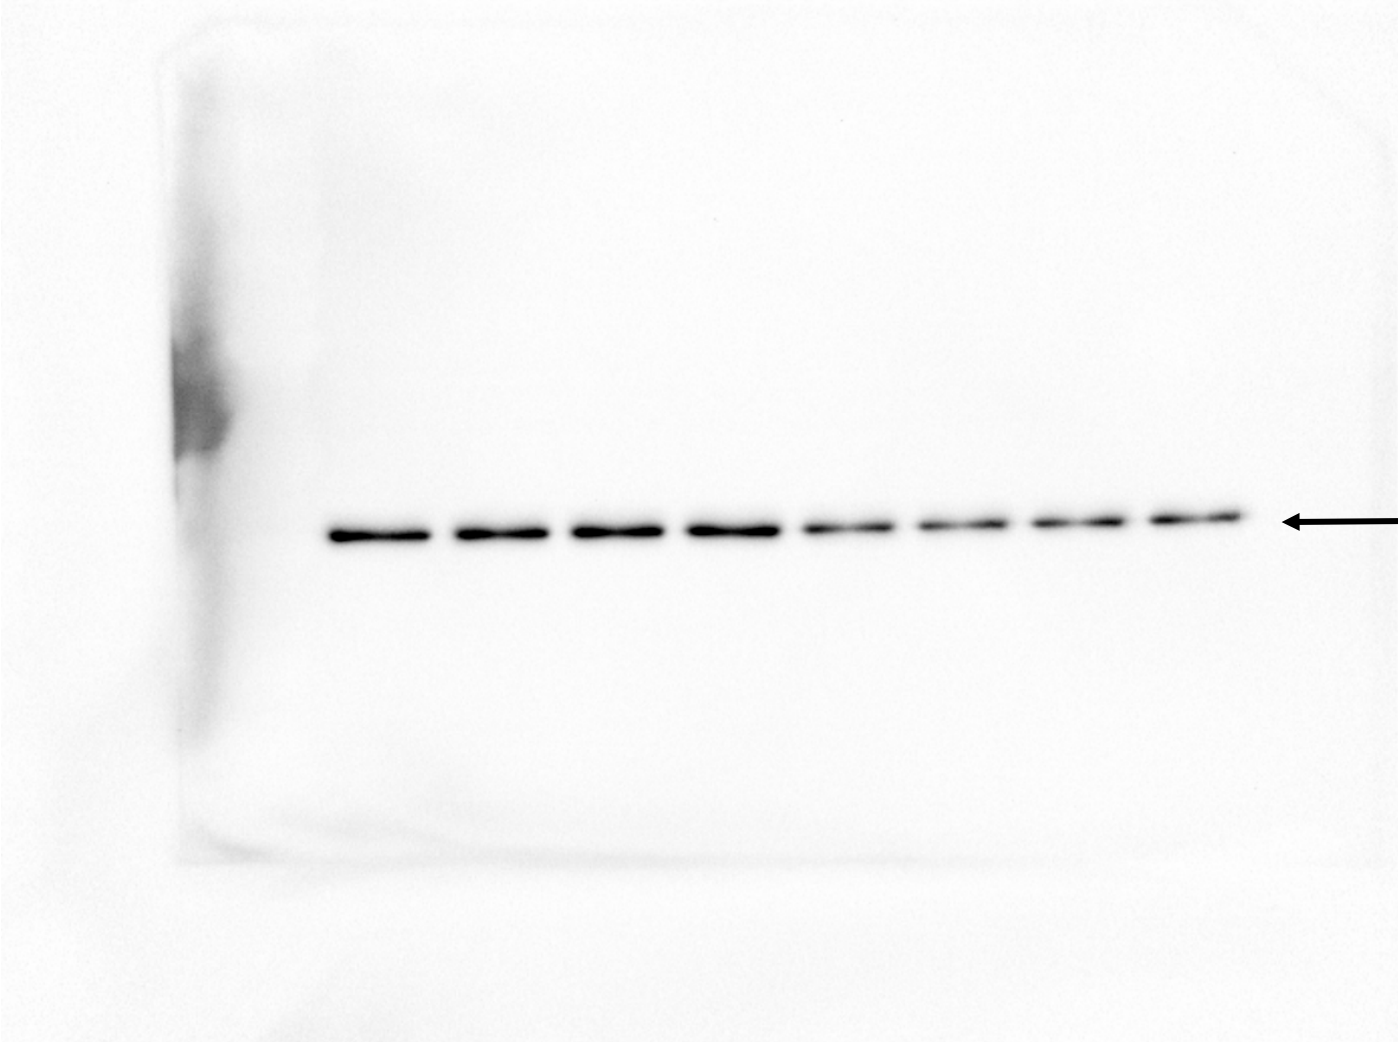

p-c-JUN  
40 kDa  
(Cell Signaling, 9261s, 1:1000)

Figure 9A

# Full unedited gel for Figure 9A

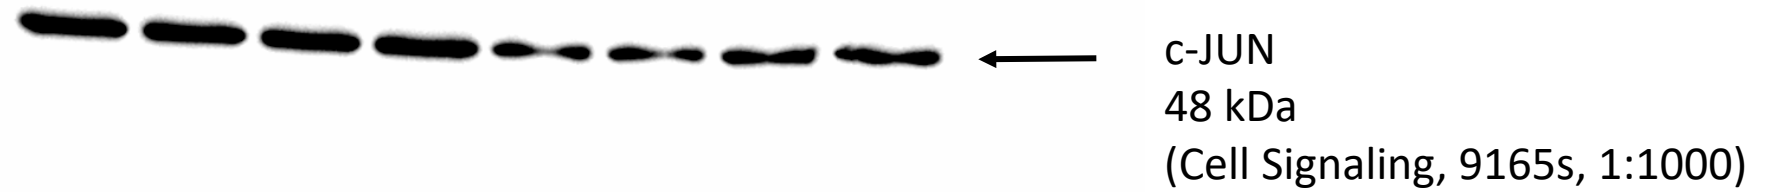

# Full unedited gel for Figure 9A

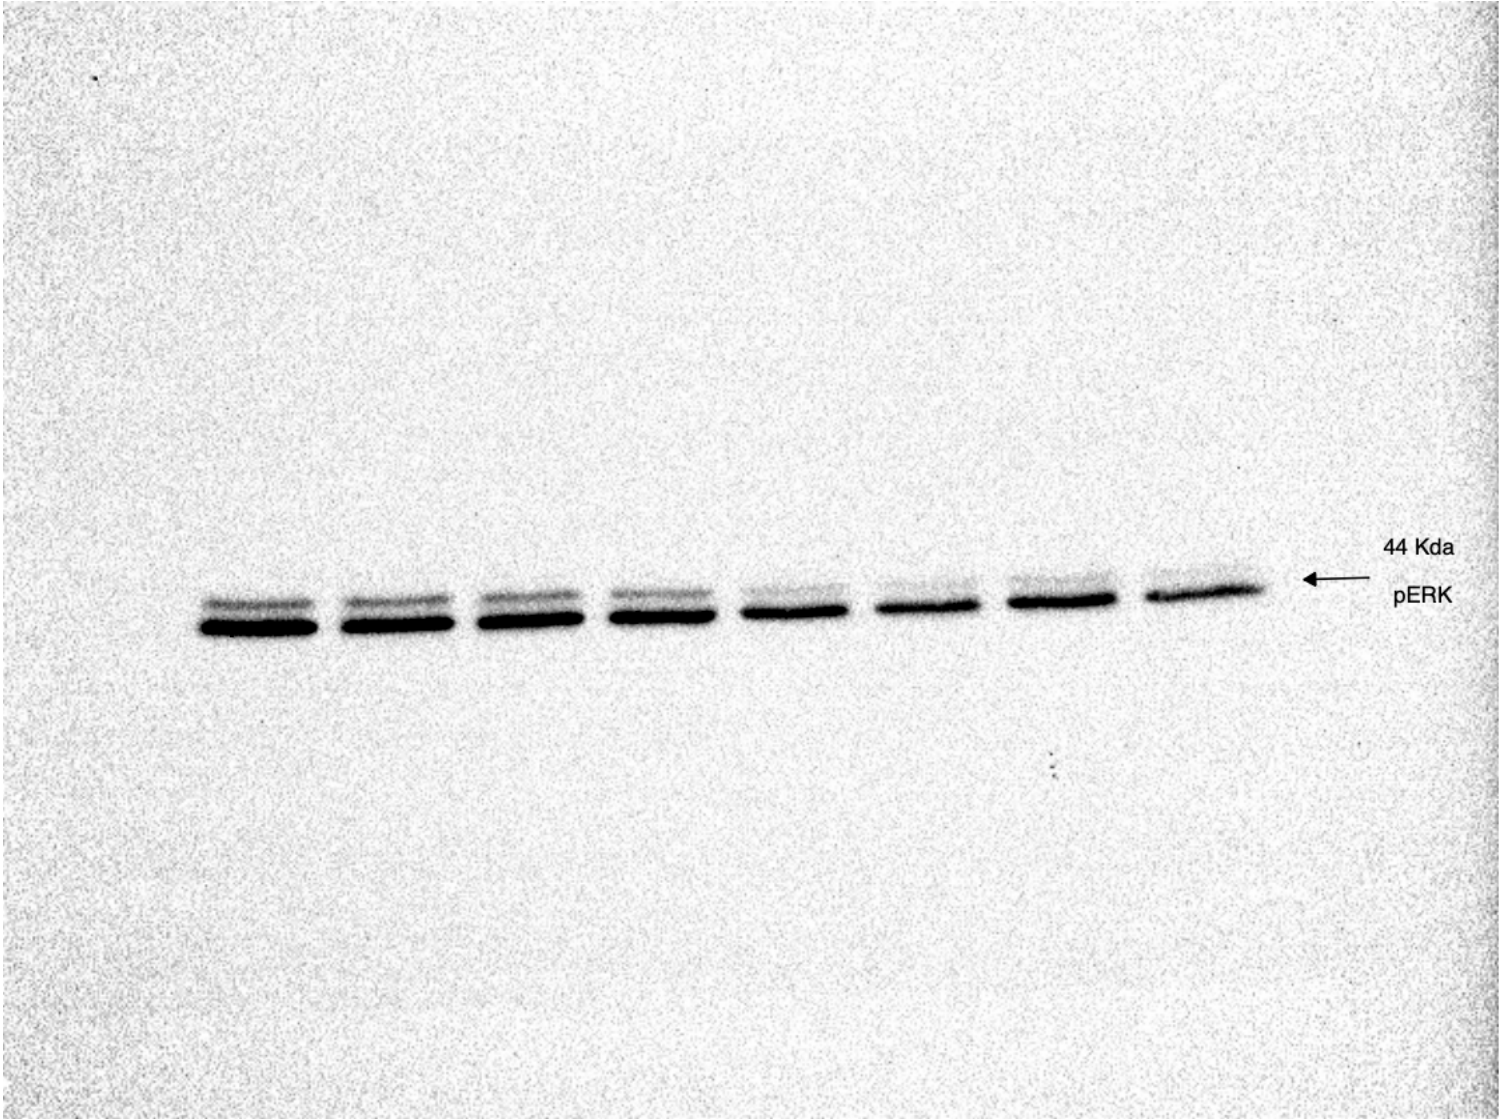

(p-ERK, Cell Signaling, 9101s, 1:1000 )

Figure 9A



# Full unedited gel for Figure 9A

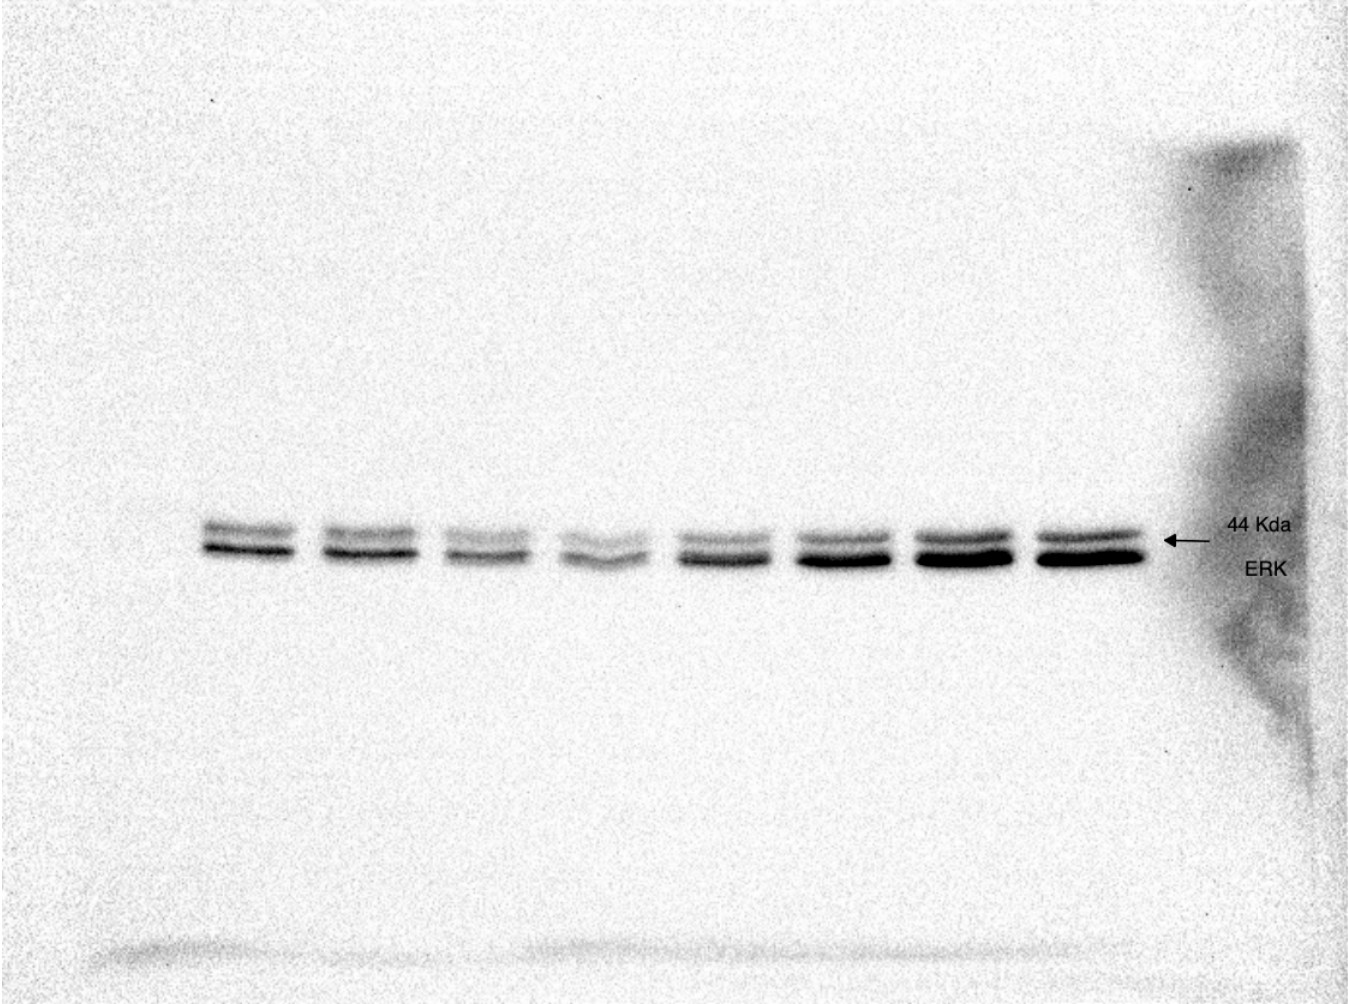

(ERK 1/2, Cell Signaling, 9102s, 1:1000)

Figure 9A

# Full unedited gel for Figure 9A

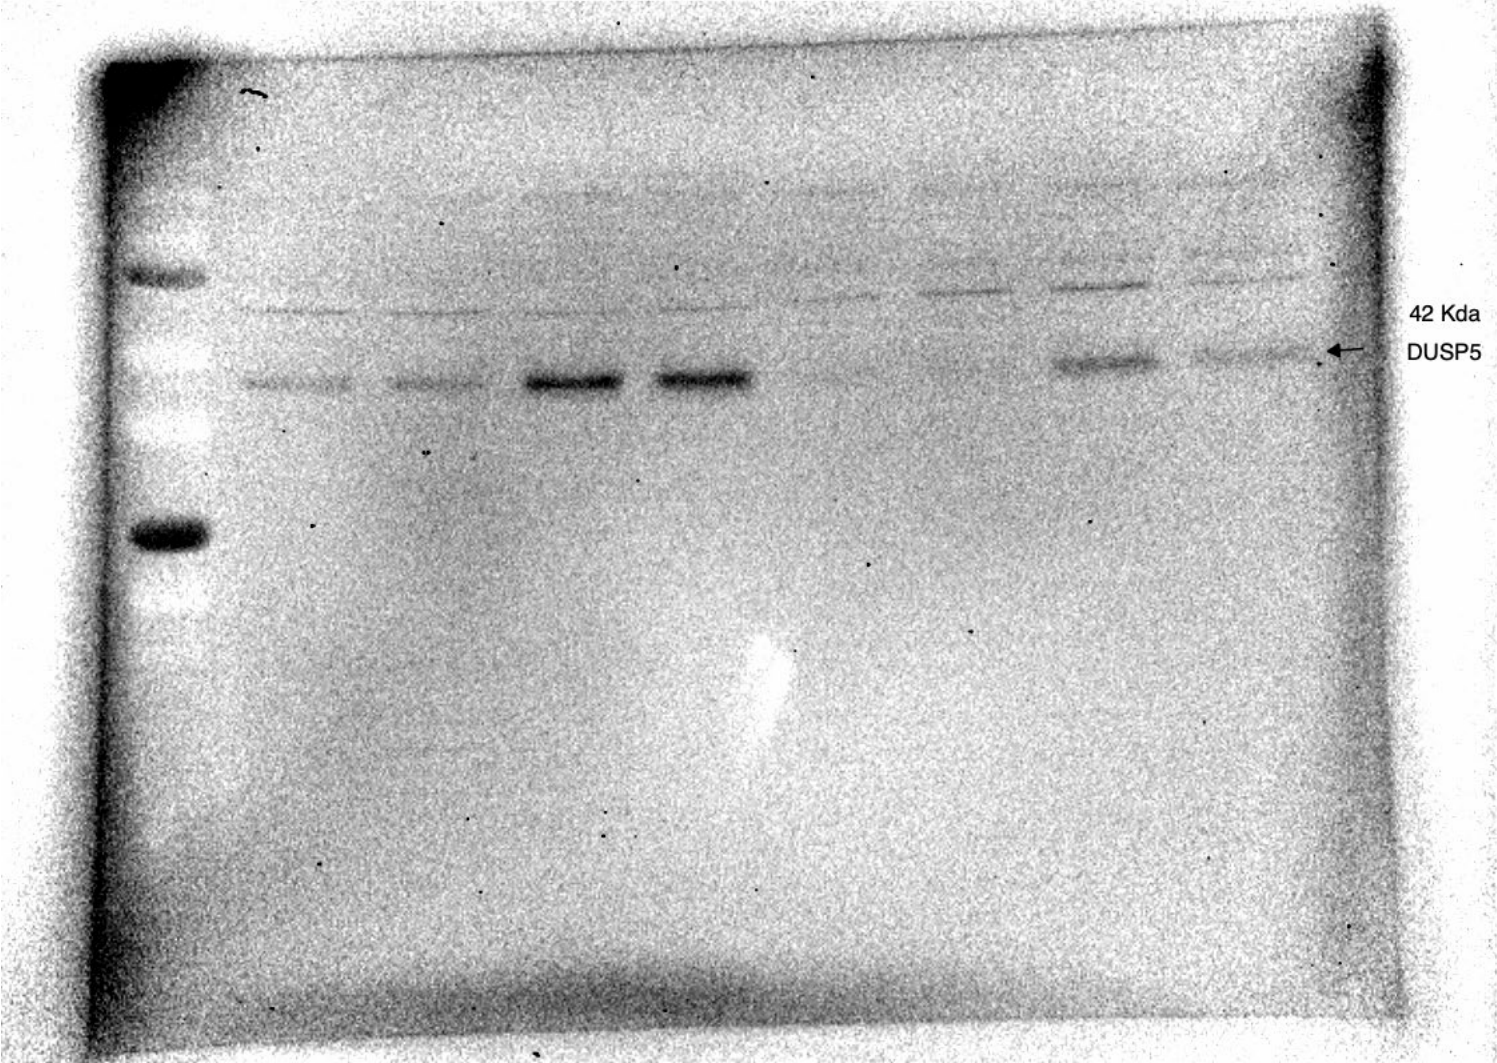

(DUSP5, Abcam, ab200708, 1:1000)

Figure 9A

# Full unedited gel for Figure 9A

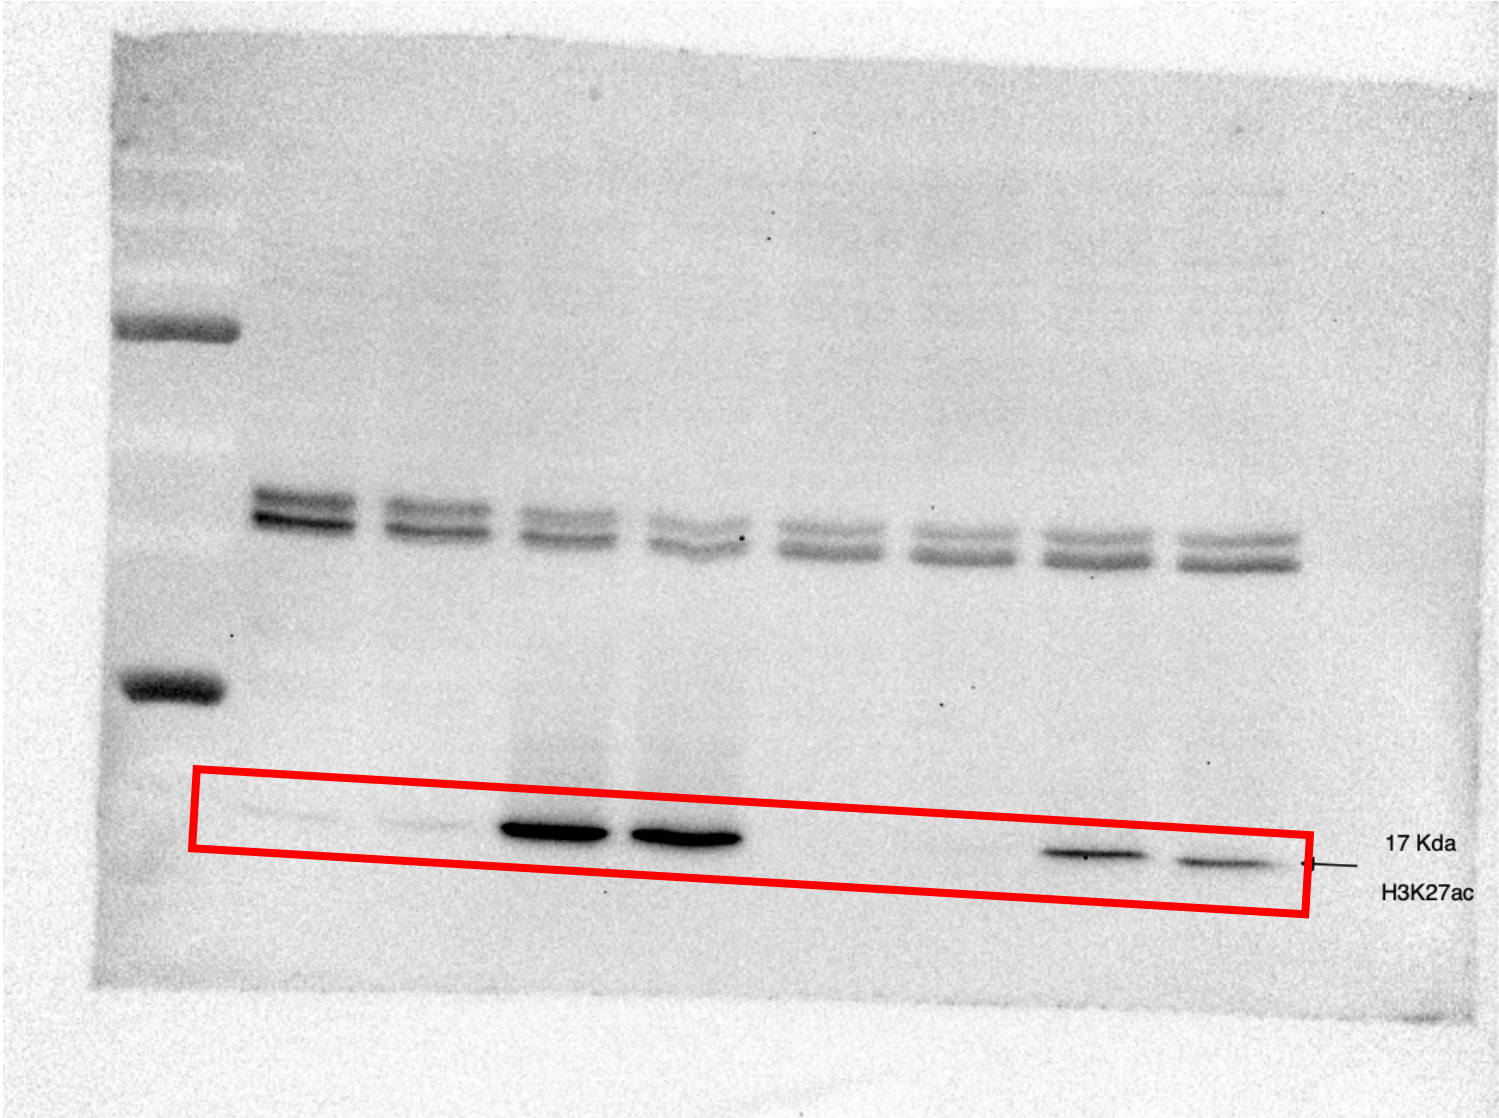

Figure 9A

(H3K27ac, Abcam, ab4729, 1:1000 )

# Full unedited gel for Figure 9A

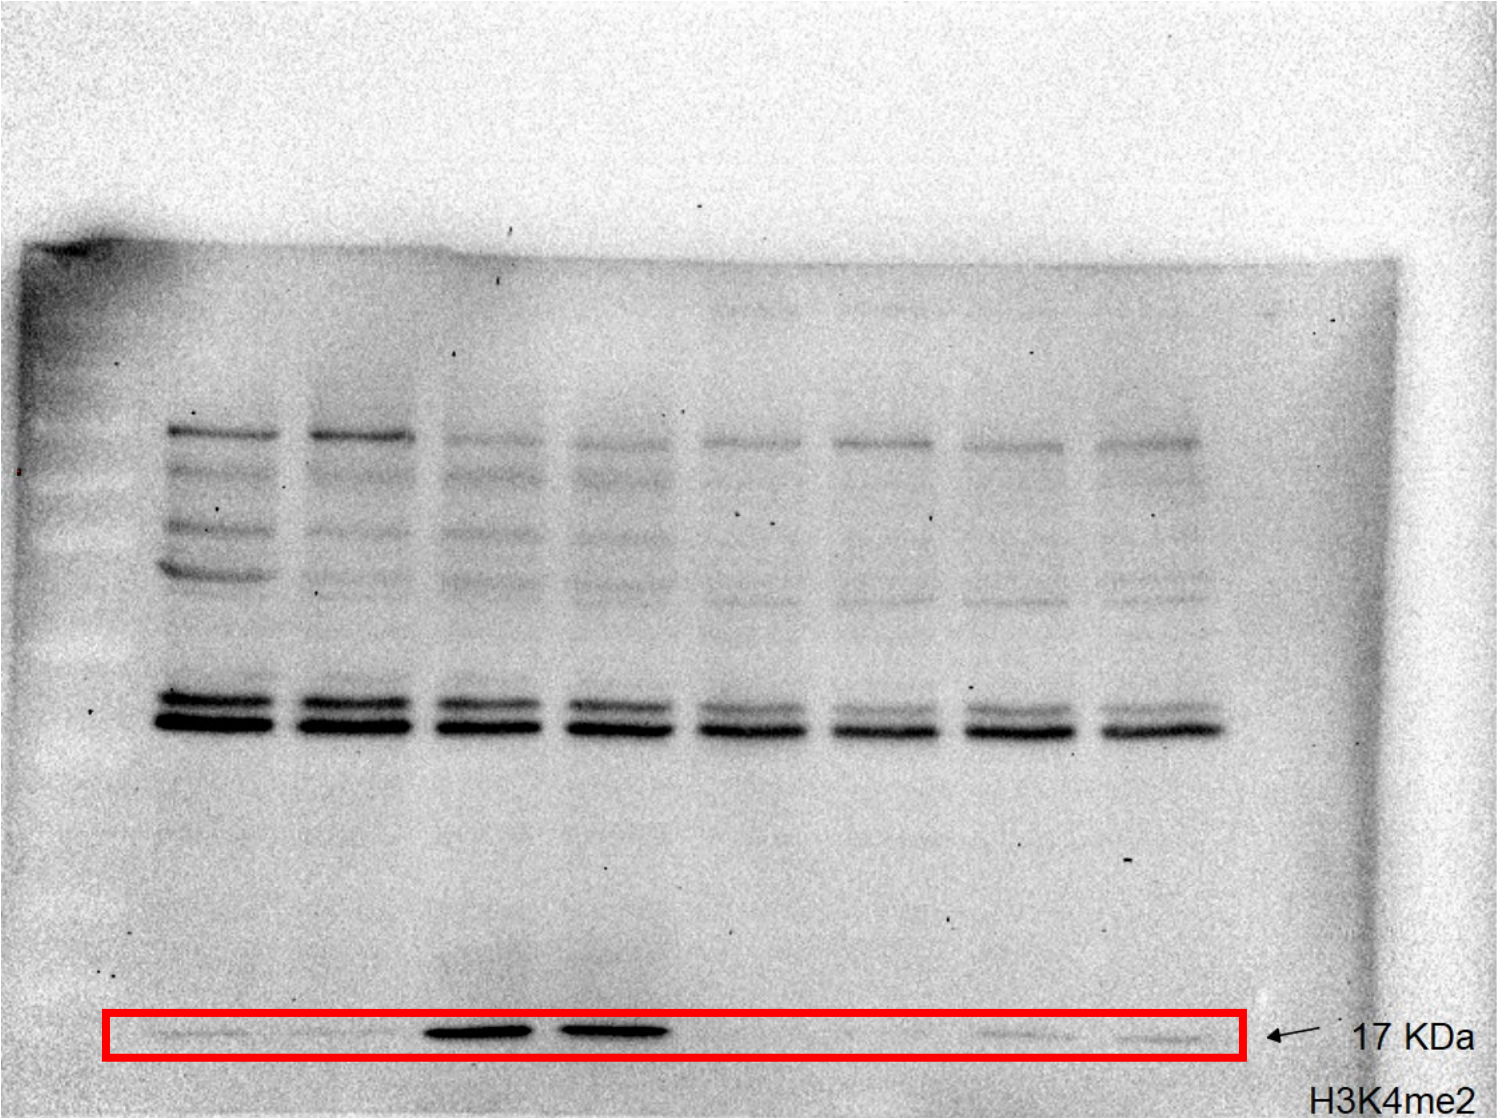

(H3K4me2, Cell Signaling, 2118L, 1:2000)

Figure 9A

# Full unedited gel for Figure 9A

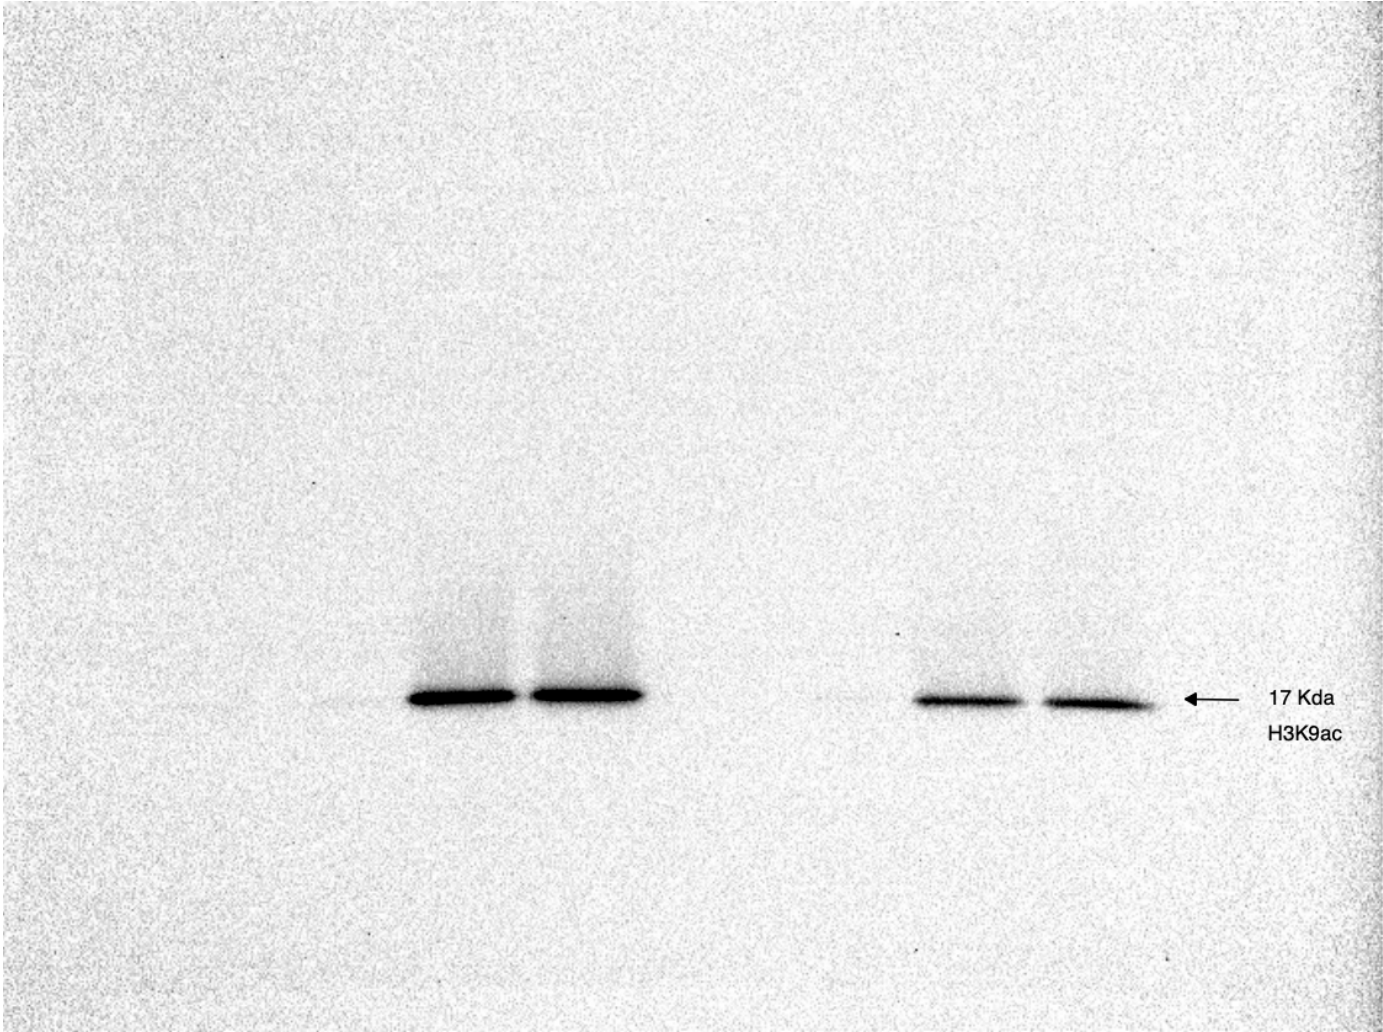

(H3K9ac, Abcam, ab32129, 1:1000)

Figure 9A

# Full unedited gel for Figure 9A

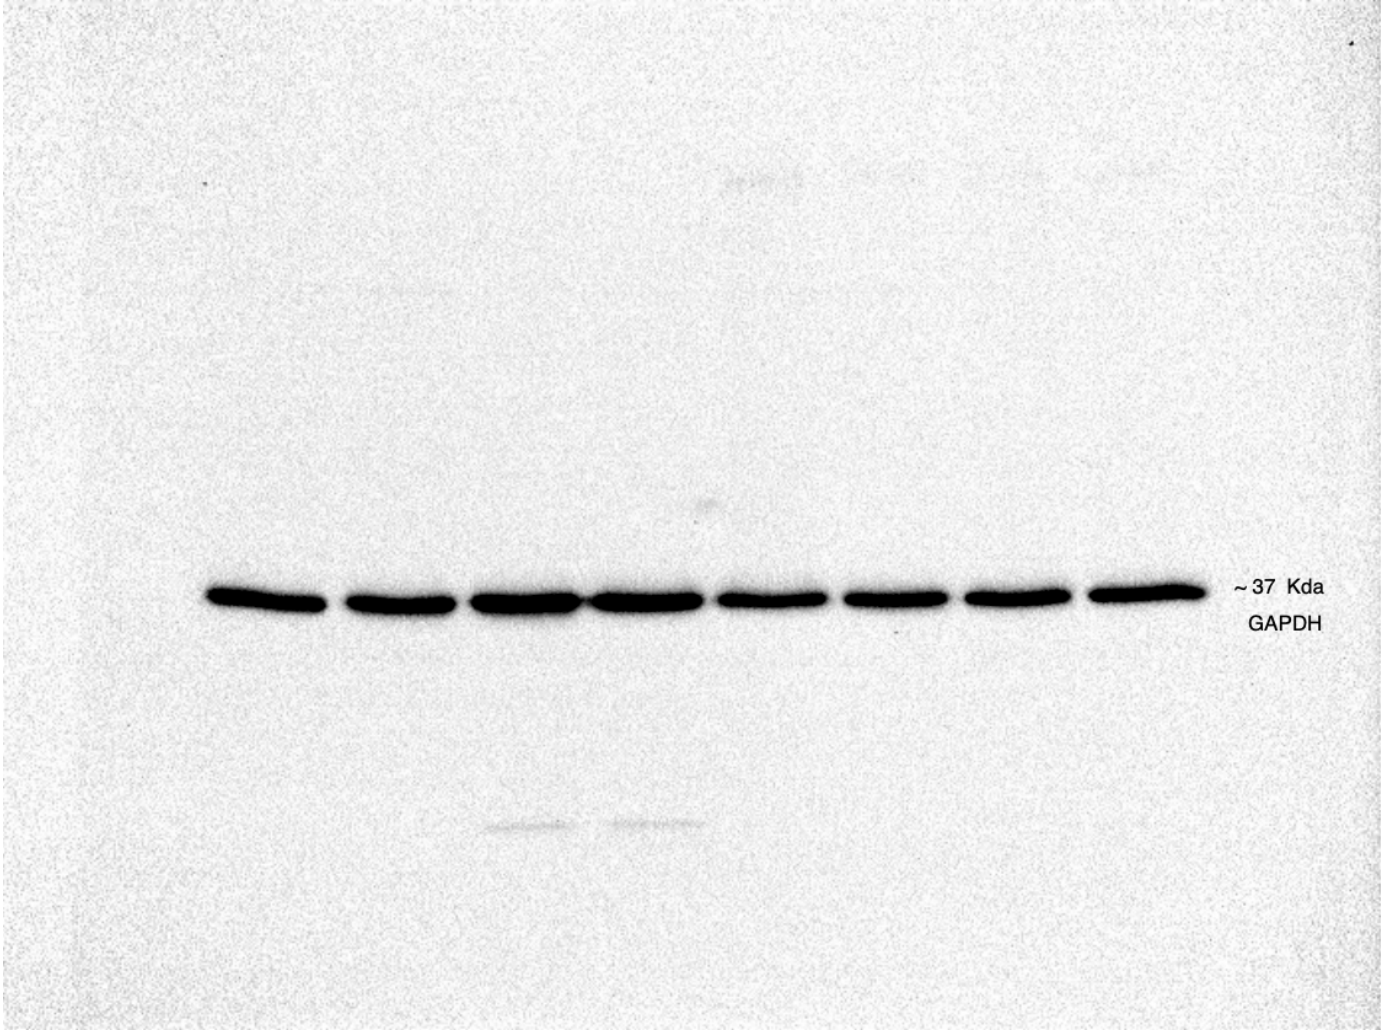

(GAPDH, Cell Signaling, 2118L, 1:2000)

Figure 9A

# Full unedited gel for Figure 9A

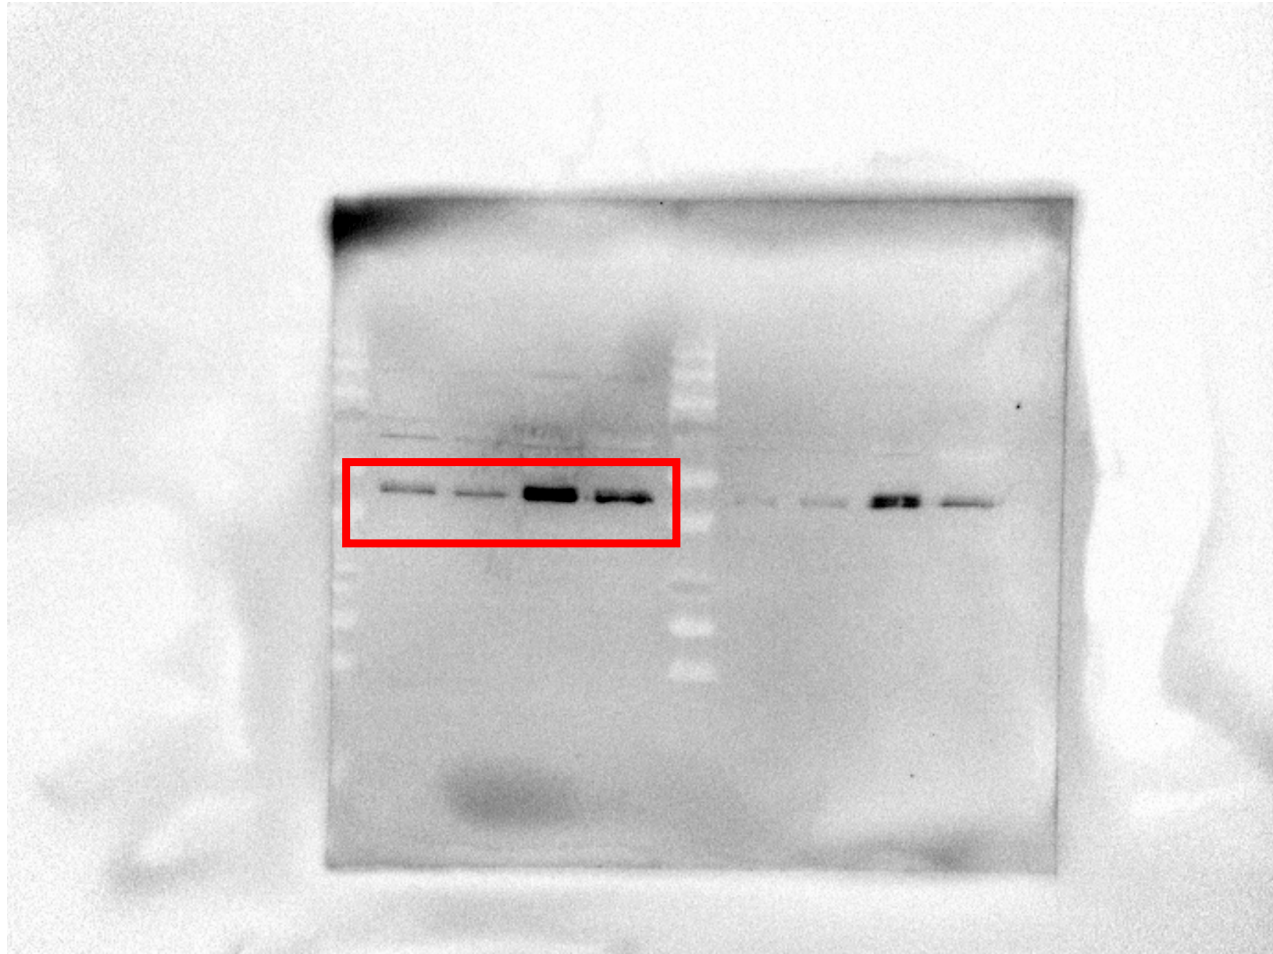

← DUSP1  
40 kDa  
(Millipore, 07-535, 1:1000)

Figure 9A

# Full unedited gel for Figure 9A

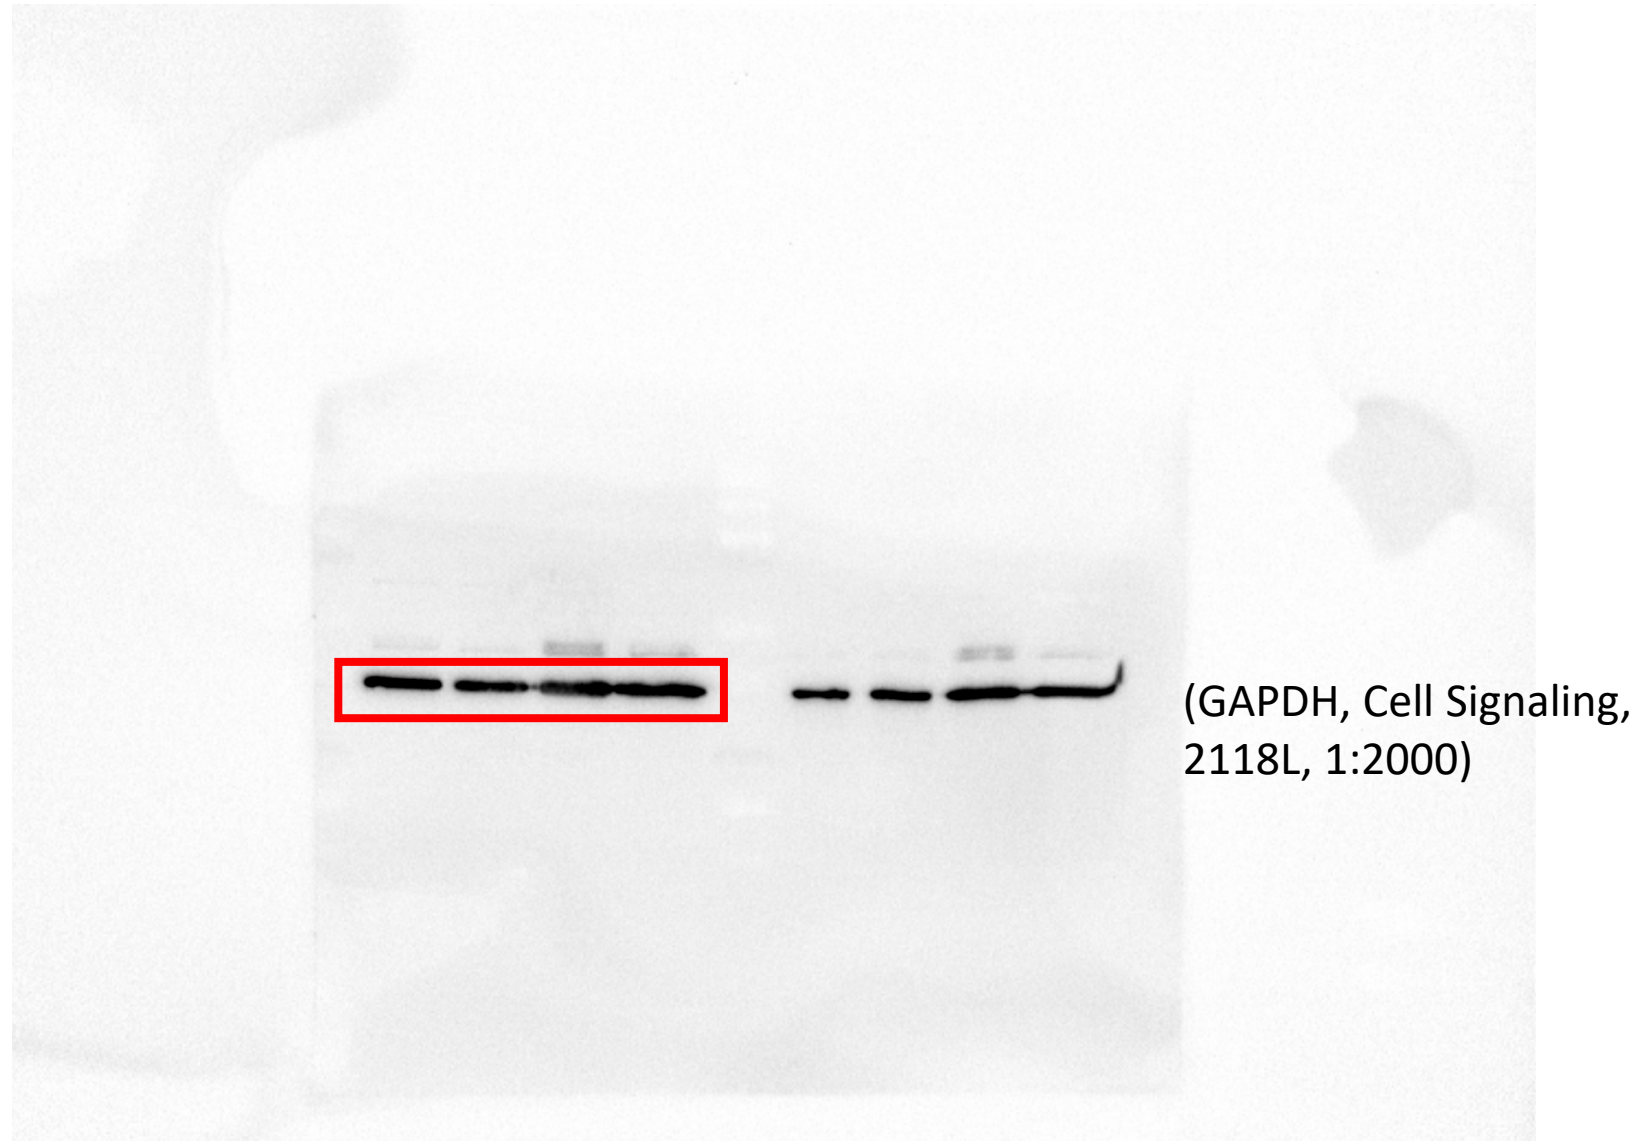

Figure 9A



# Full unedited gel for Figure 9A

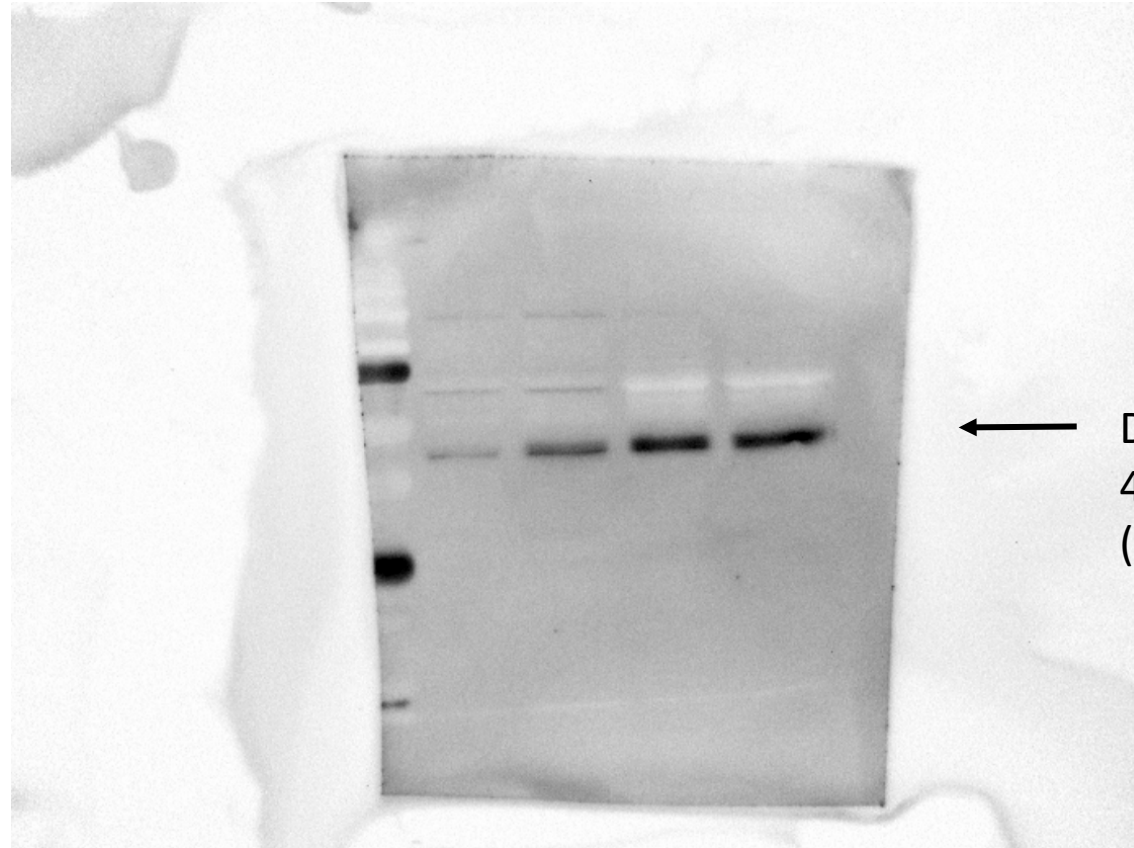

← DUSP1  
40 kDa  
(Millipore, 07-535, 1:1000)

Figure 9A

# Full unedited gel for Figure 9A

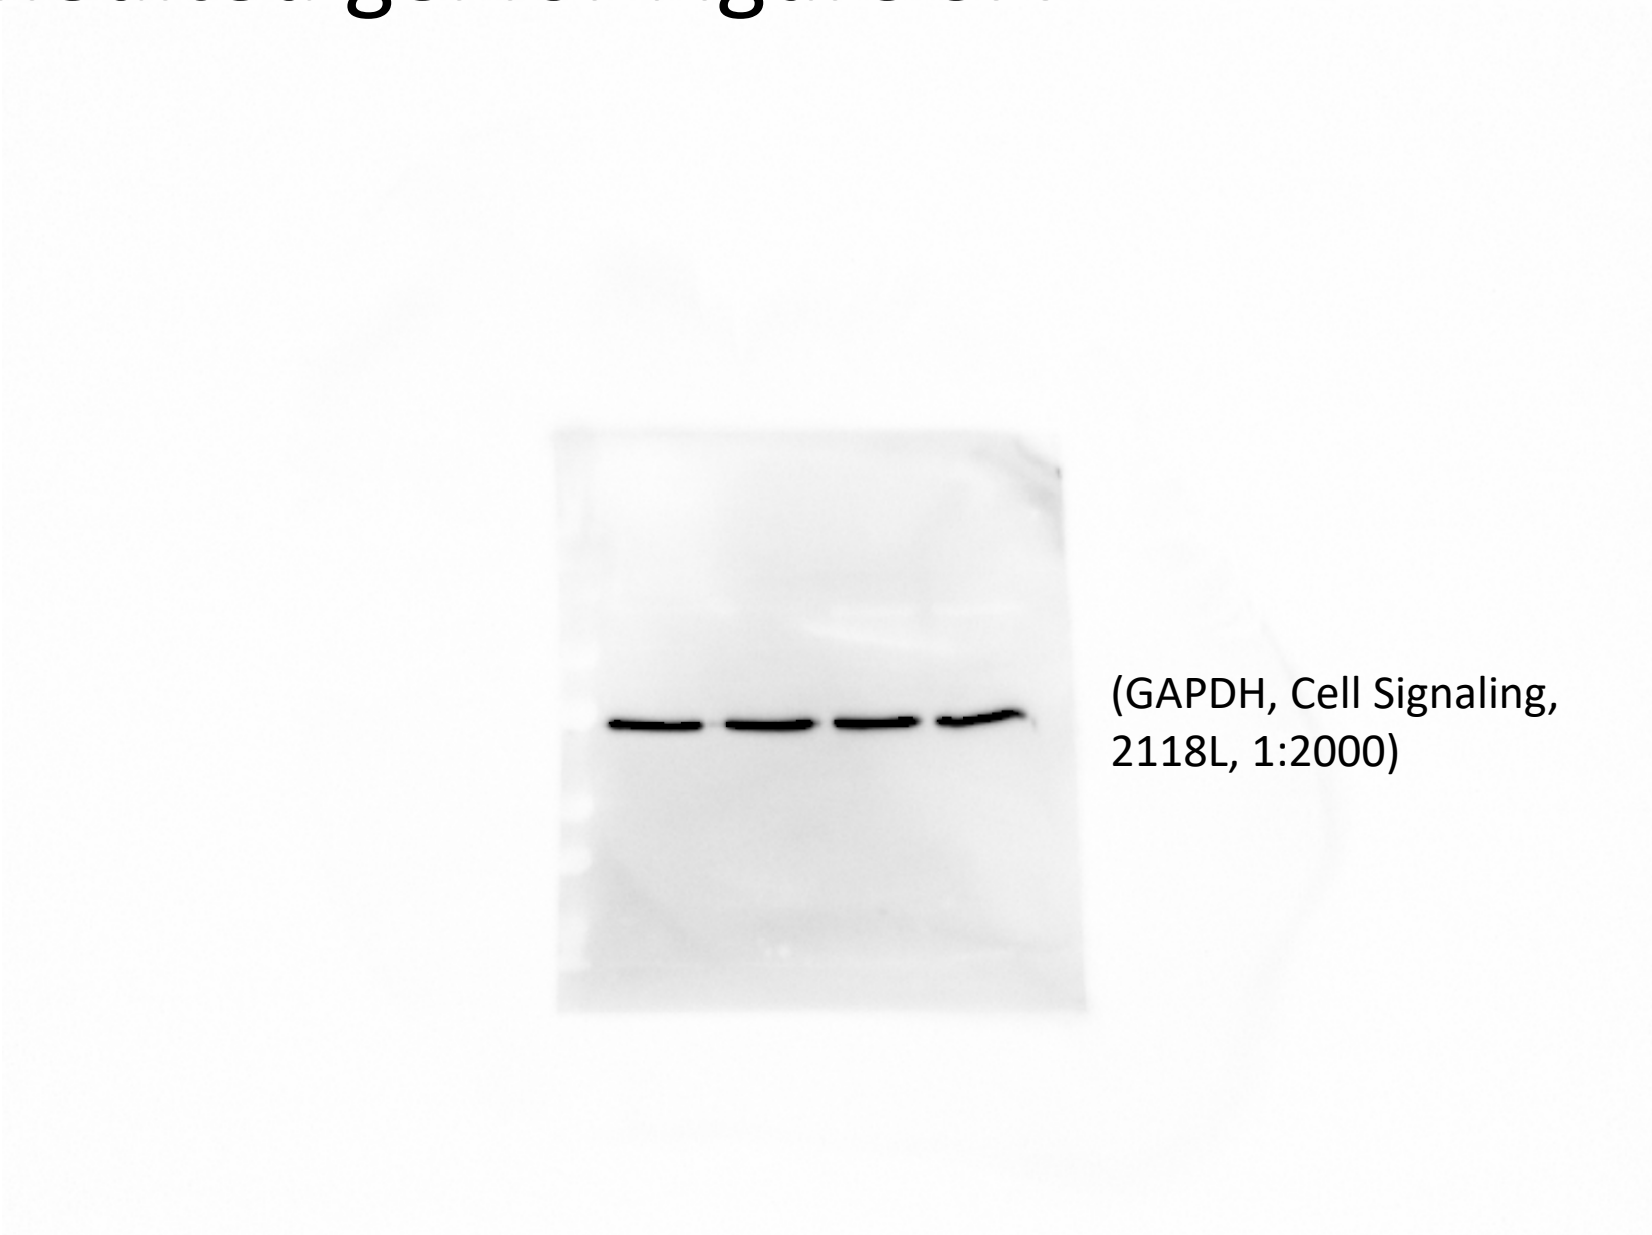

Figure 9A

# Full unedited gel for Figure 10C

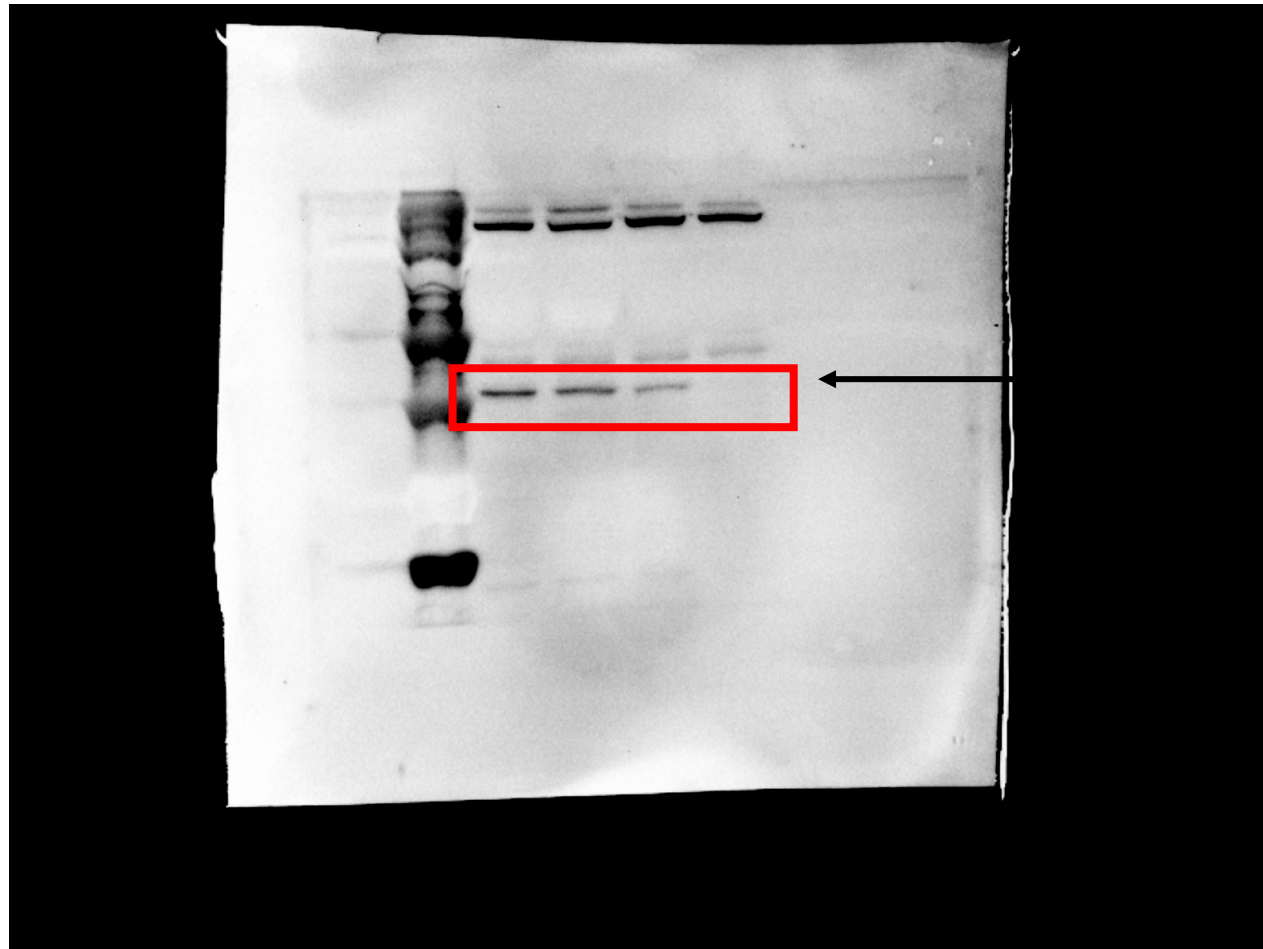

p-p38  
43 kDa  
(Cell Signaling, 4631s, 1:1000)

Figure 10C

# Full unedited gel for Figure 10C

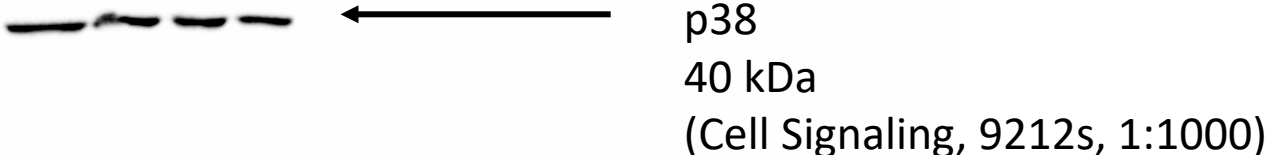

Figure 10C

# Full unedited gel for Figure 10C

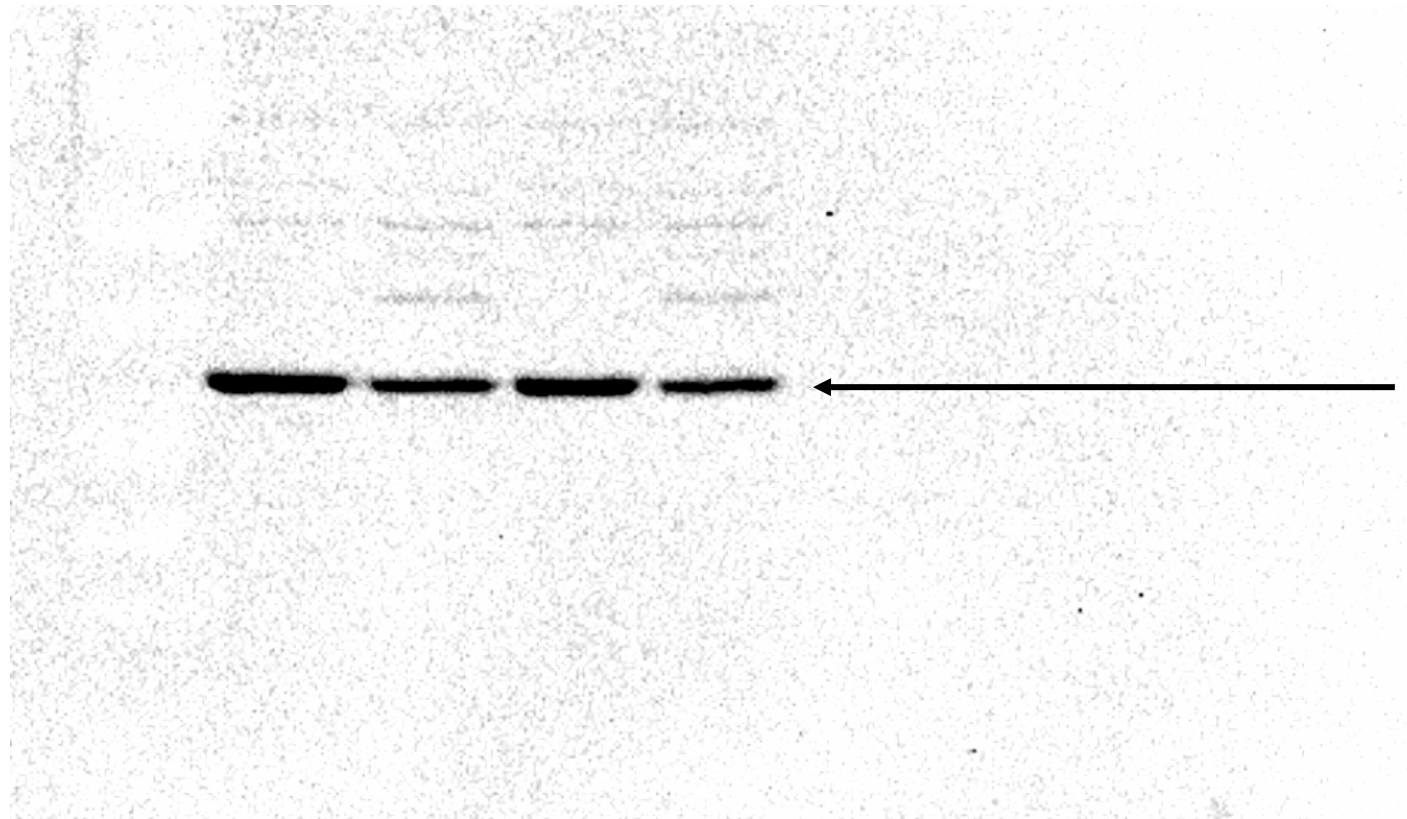

p-p38  
43 kDa  
(Cell Signaling, 4631s, 1:1000)

# Full unedited gel for Figure 10C

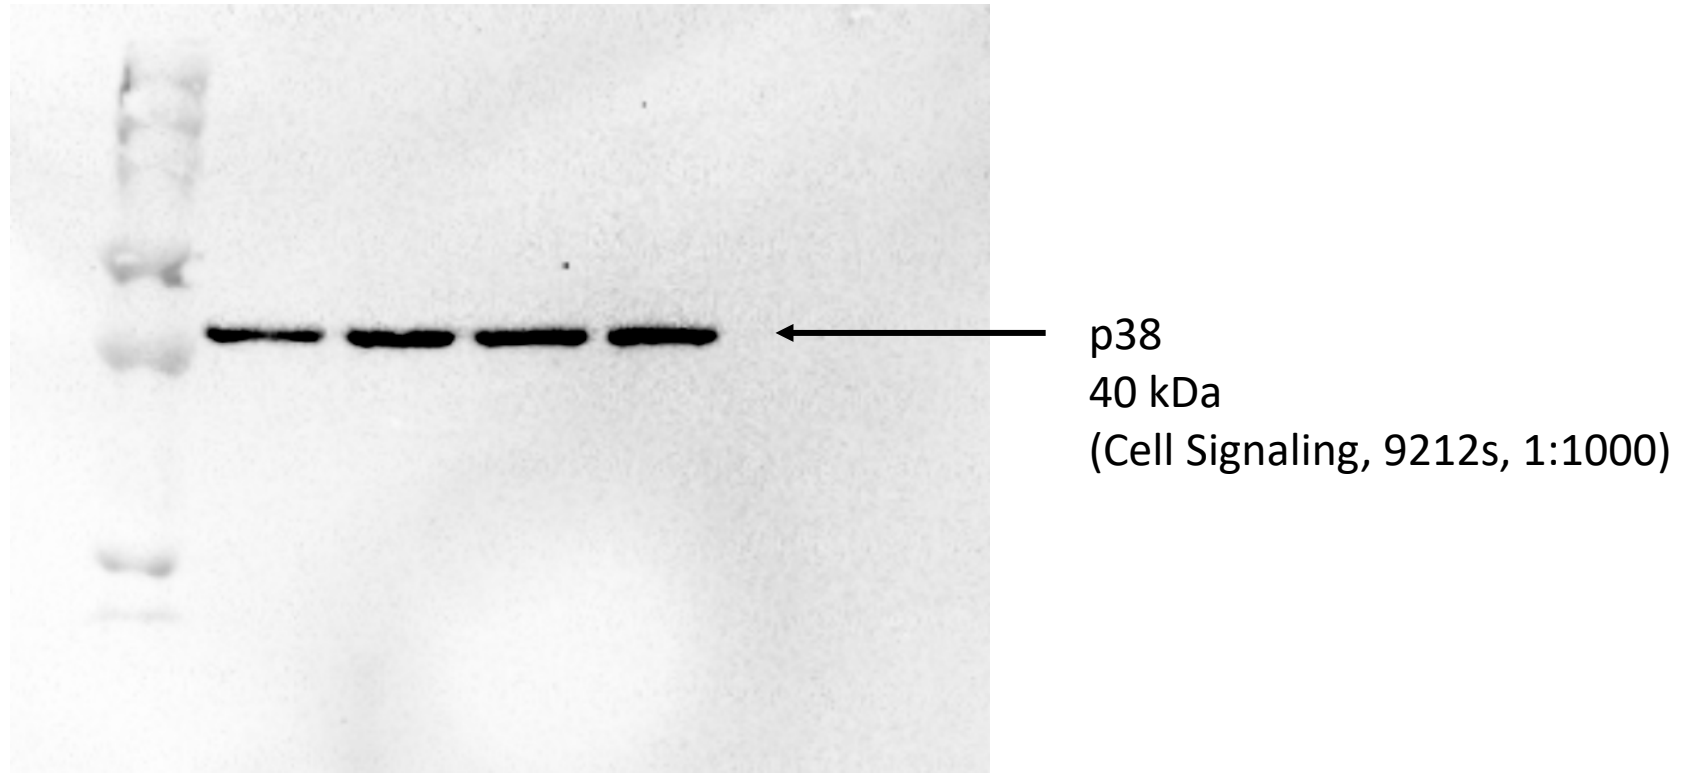

Figure 10C

# Supplementary Figures

# Full unedited gel for Supplementary Figure 1G

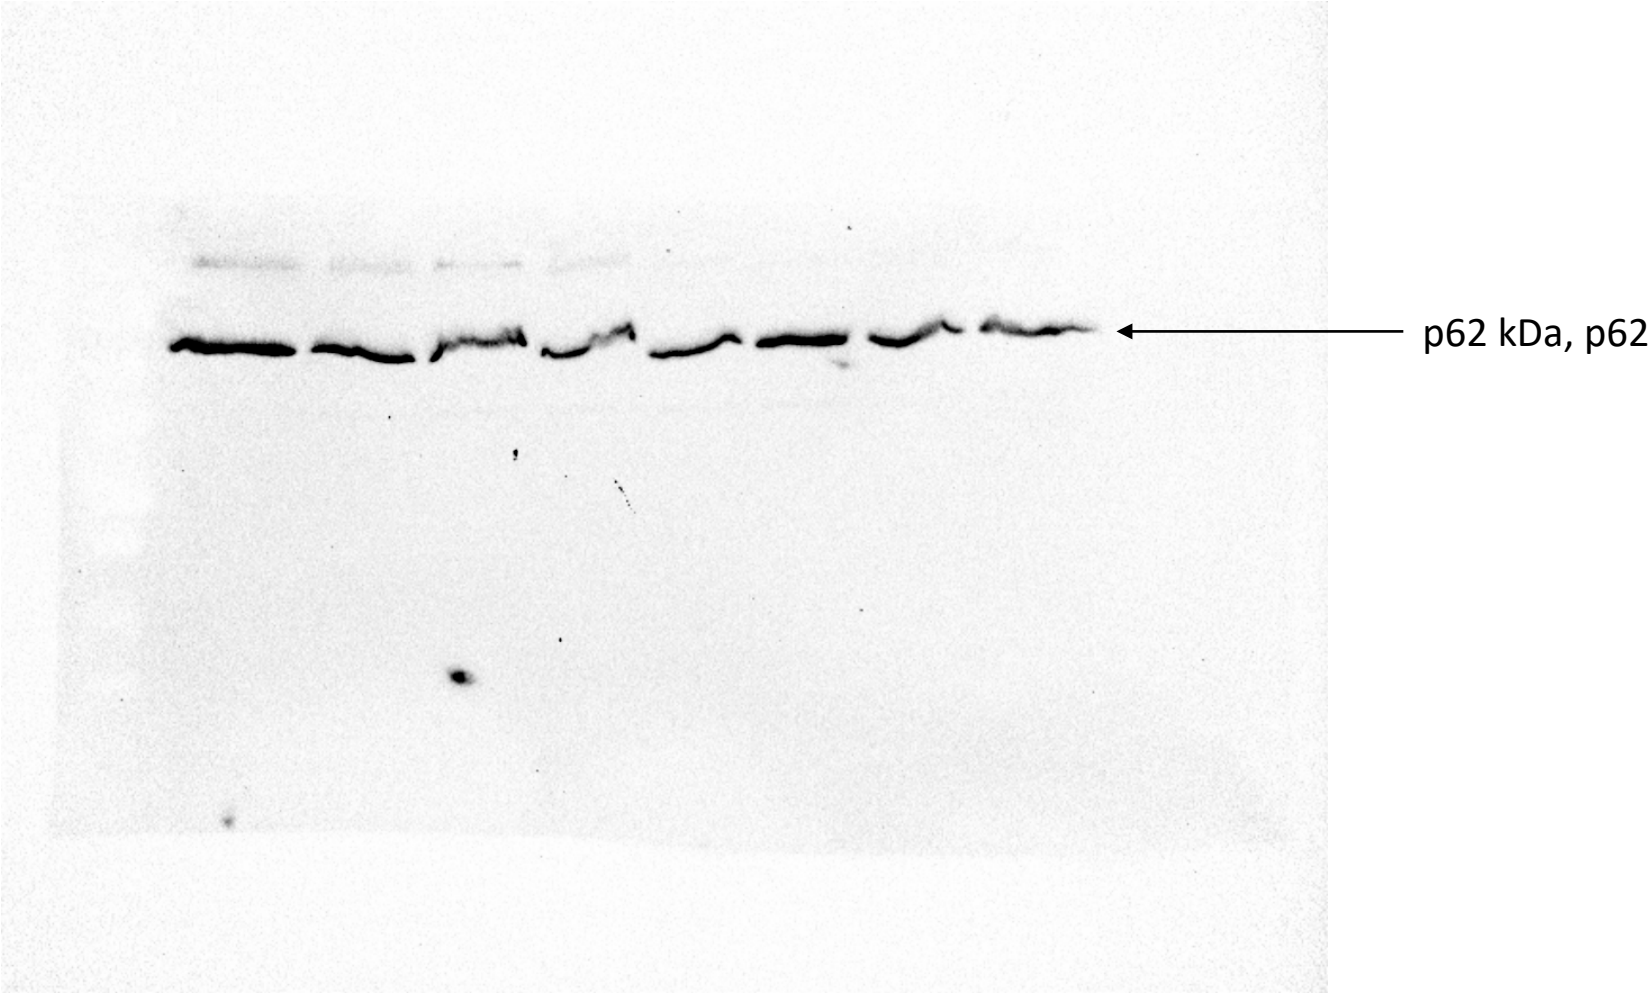



# Full unedited gel for Supplementary Figure 1G

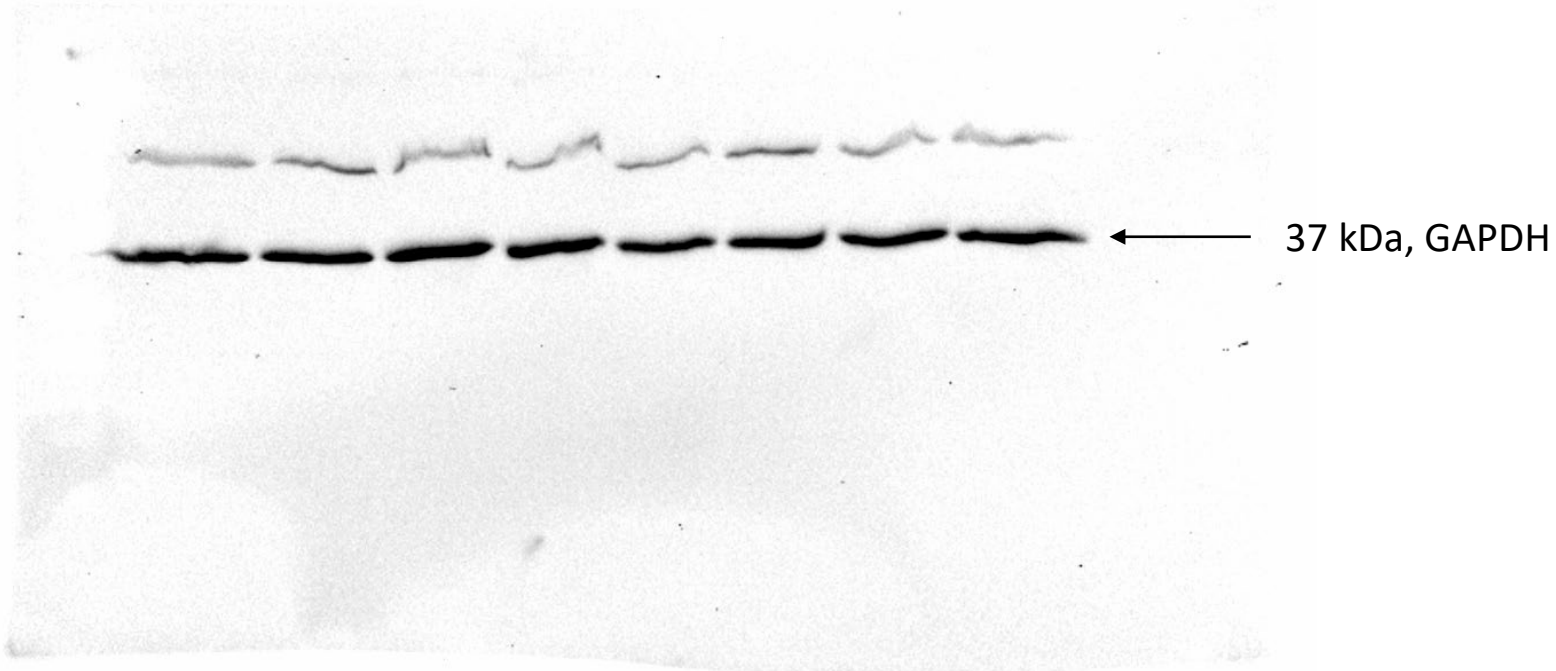

# Full unedited gel for Supplementary Figure 1G

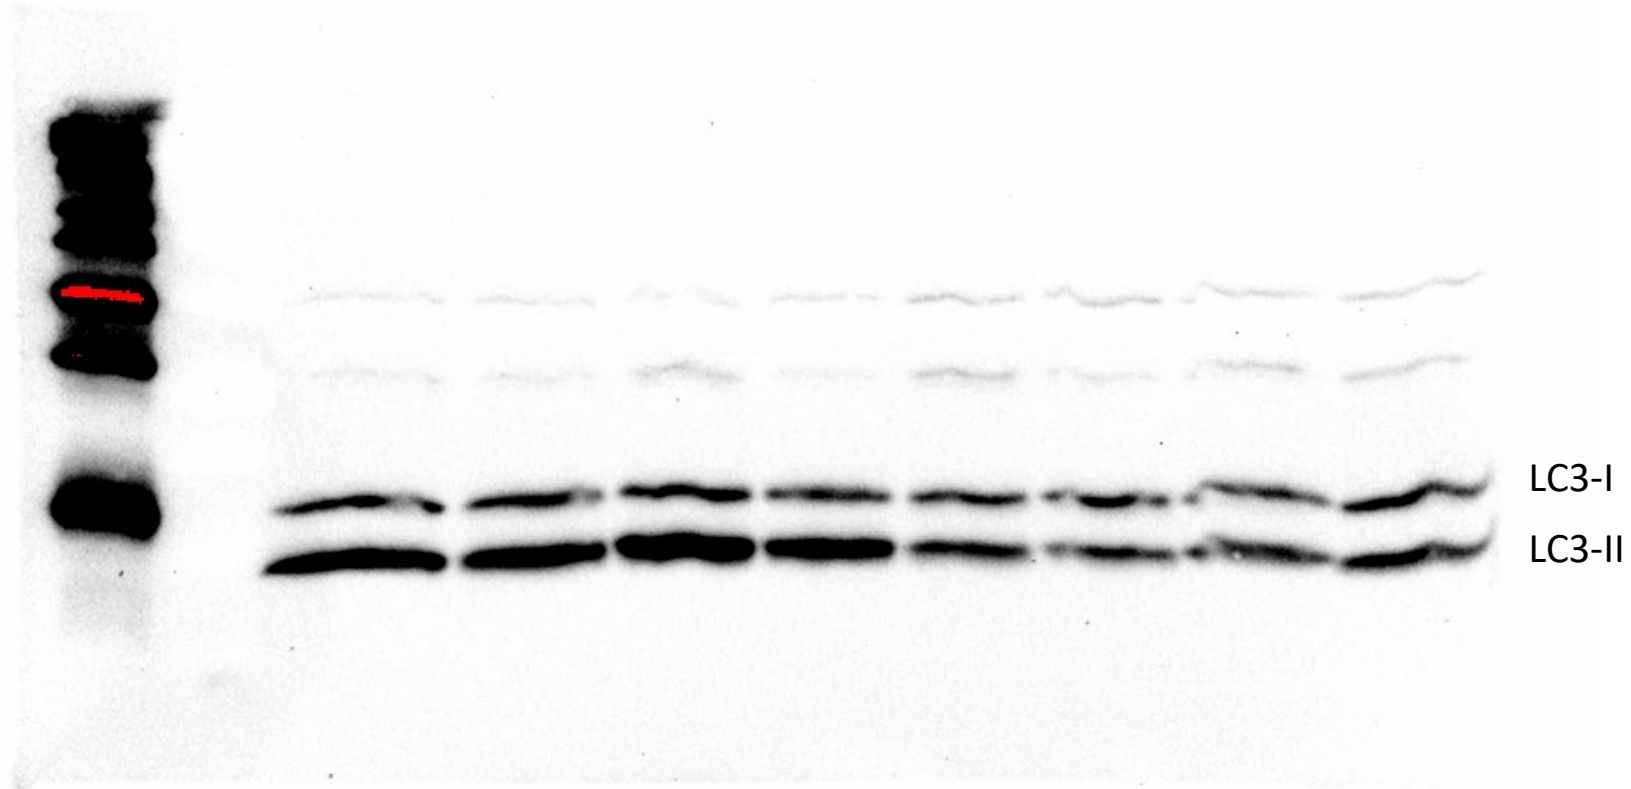

# Full unedited gel for Supplementary Figure 1G

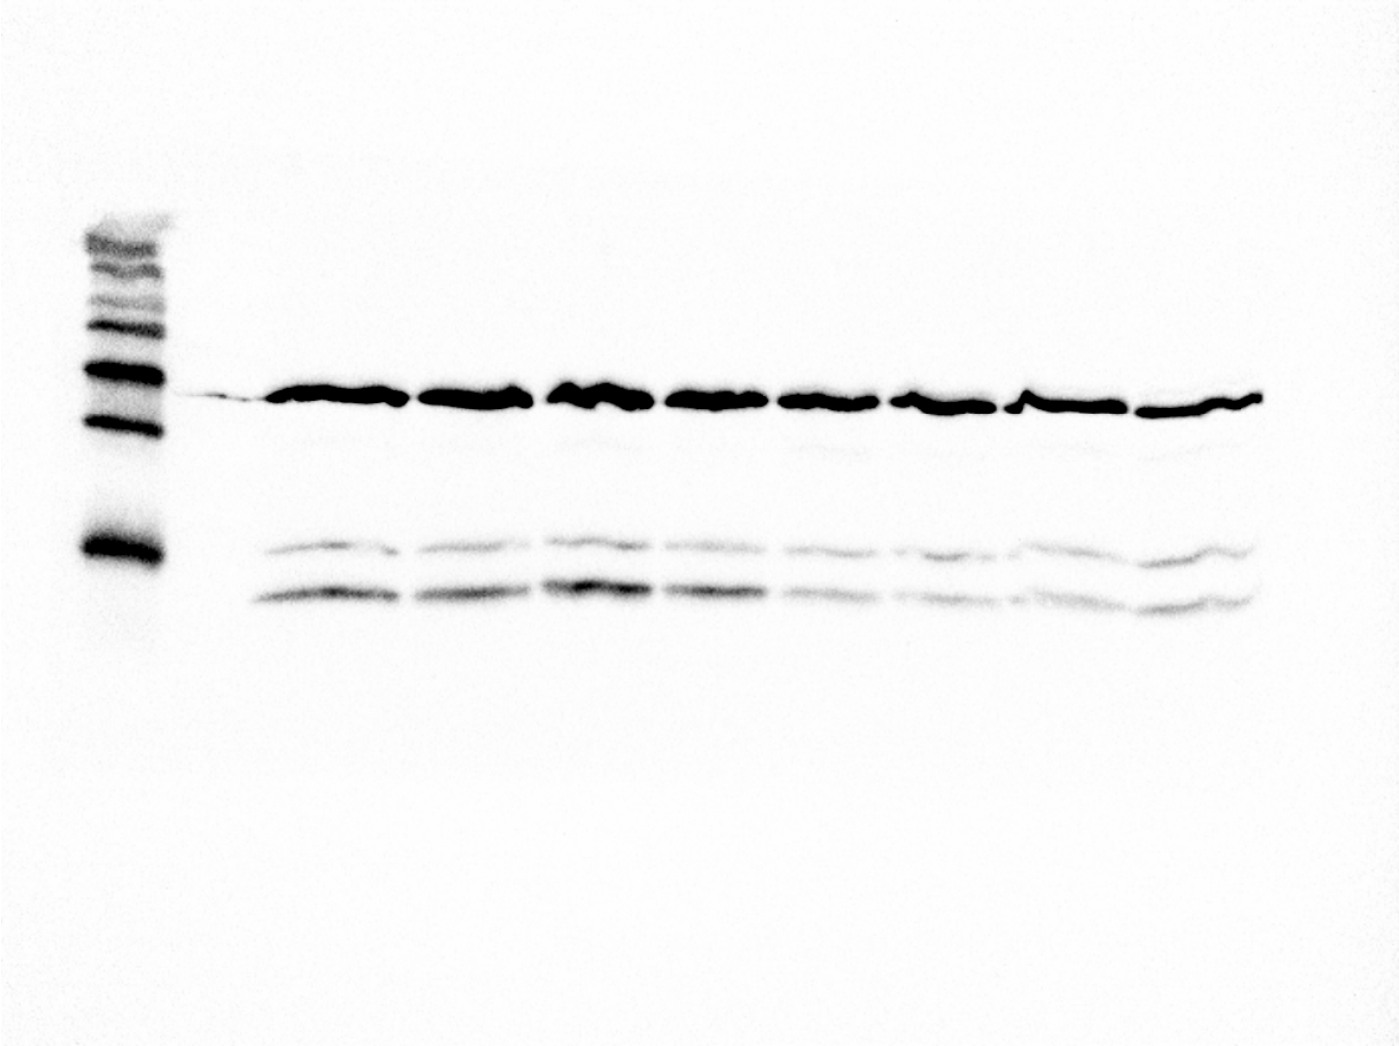

37 kDa, GAPDH

# Full unedited gel for Supplementary Figure 4A

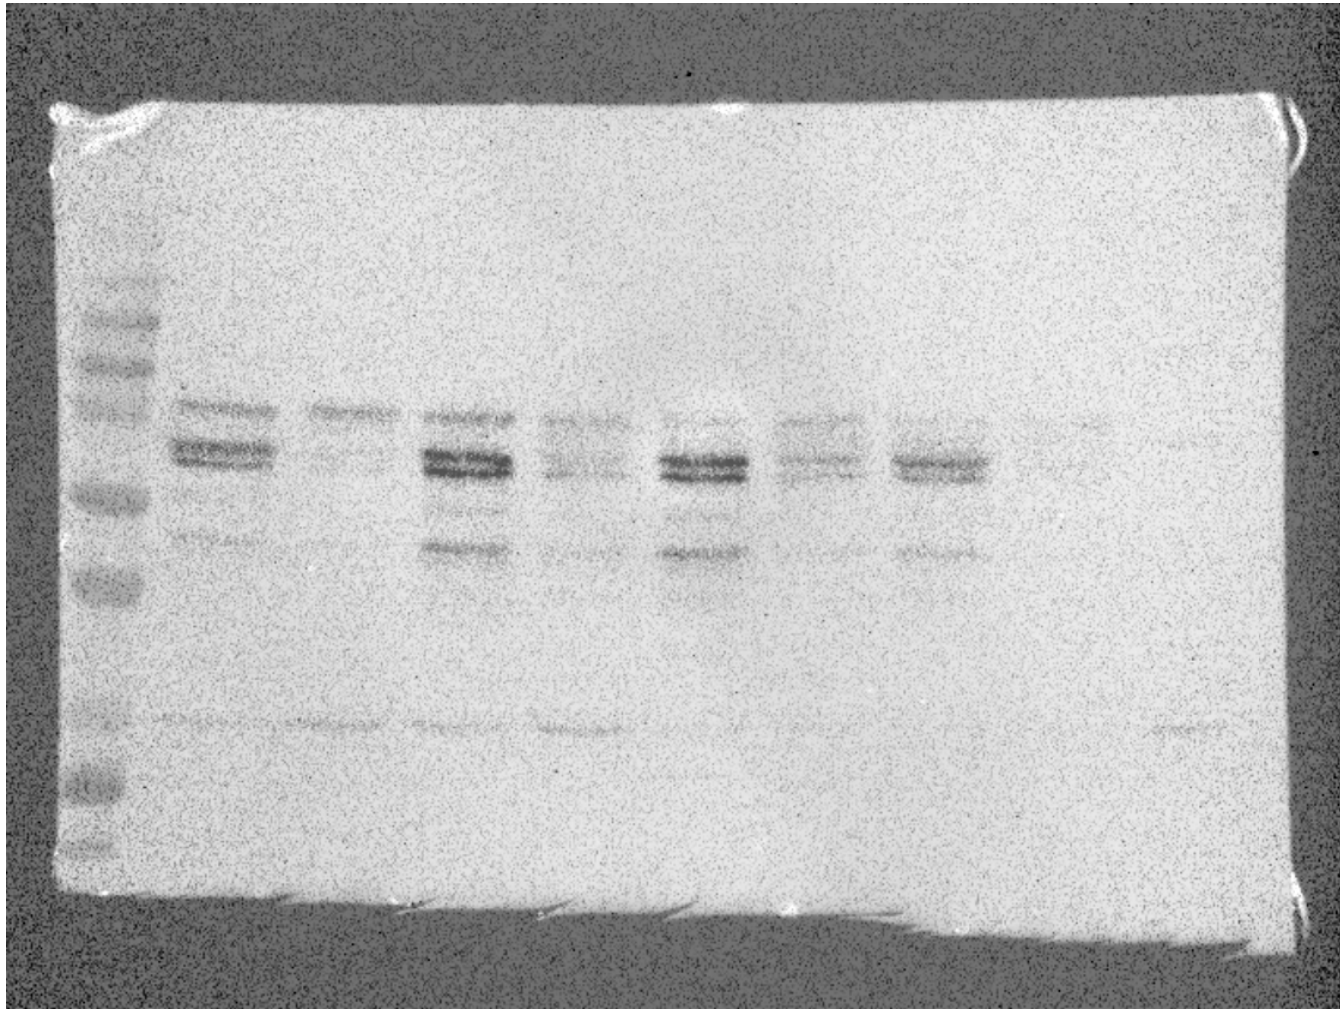

← MITF  
65 kDa  
(Cell Signaling, 12590s, 1:1000)

# Full unedited gel for Supplementary Figure 4A

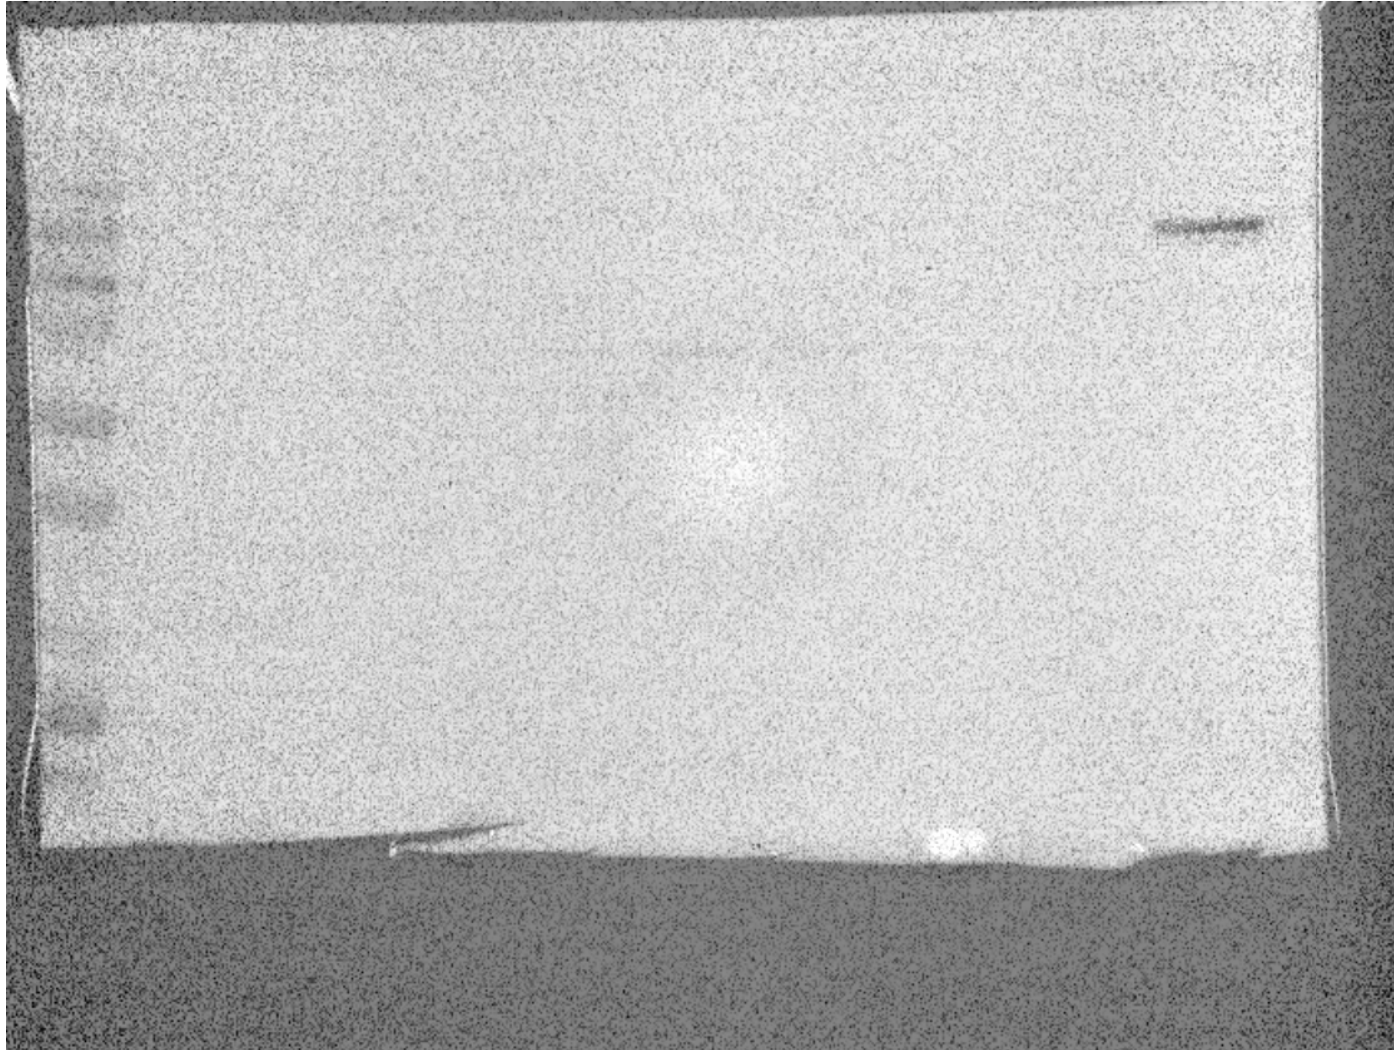

← AXL  
138 kDa  
(Cell Signaling, 8661s, 1:1000)

AXL was run in an additional cell line (1205Lu) as a positive control. 1205Lu cells have high AXL expression. This is to prove that the absence of AXL bands in the other cell lines is due to the biology and not the quality of the antibody.

# Full unedited gel for Supplementary Figure 4A

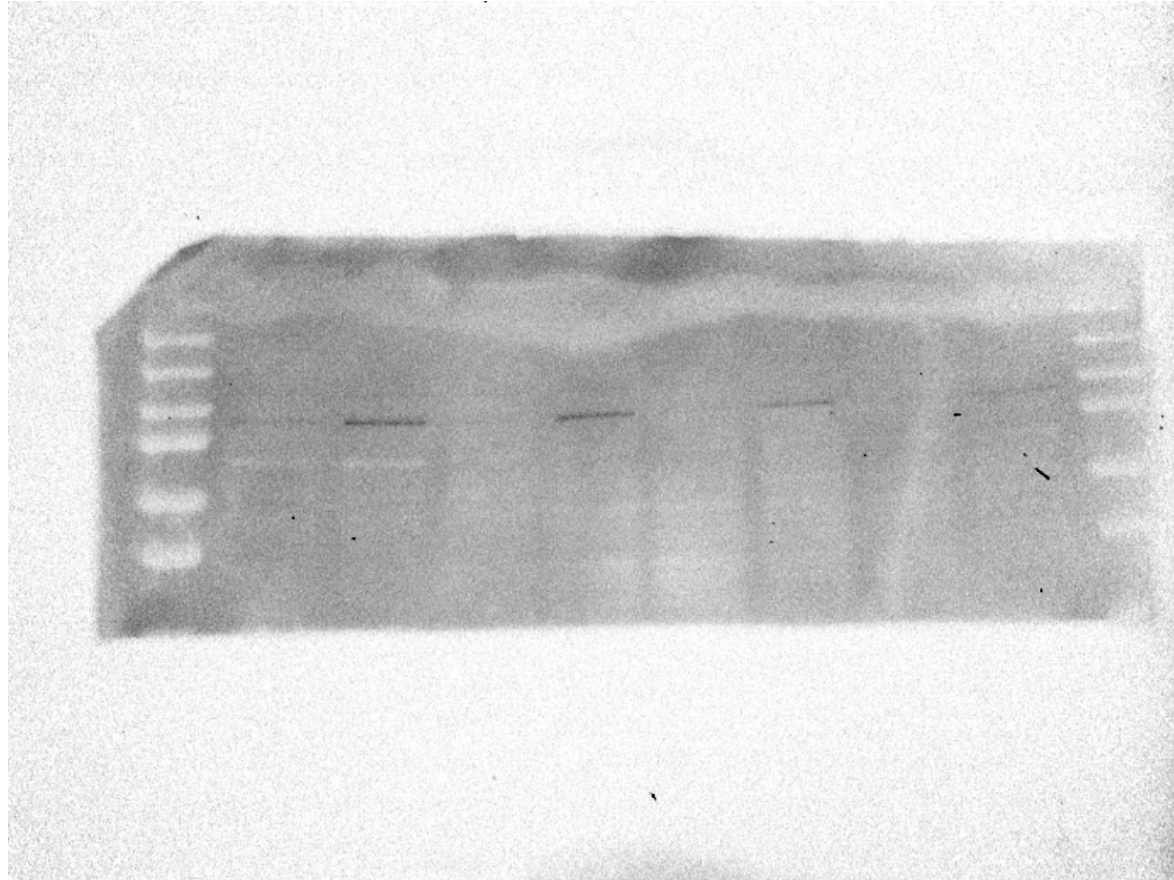

← Cleaved PARP  
89 kDa  
(Cell Signaling, 9541s, 1:1000)

# Full unedited gel for Supplementary Figure 4A

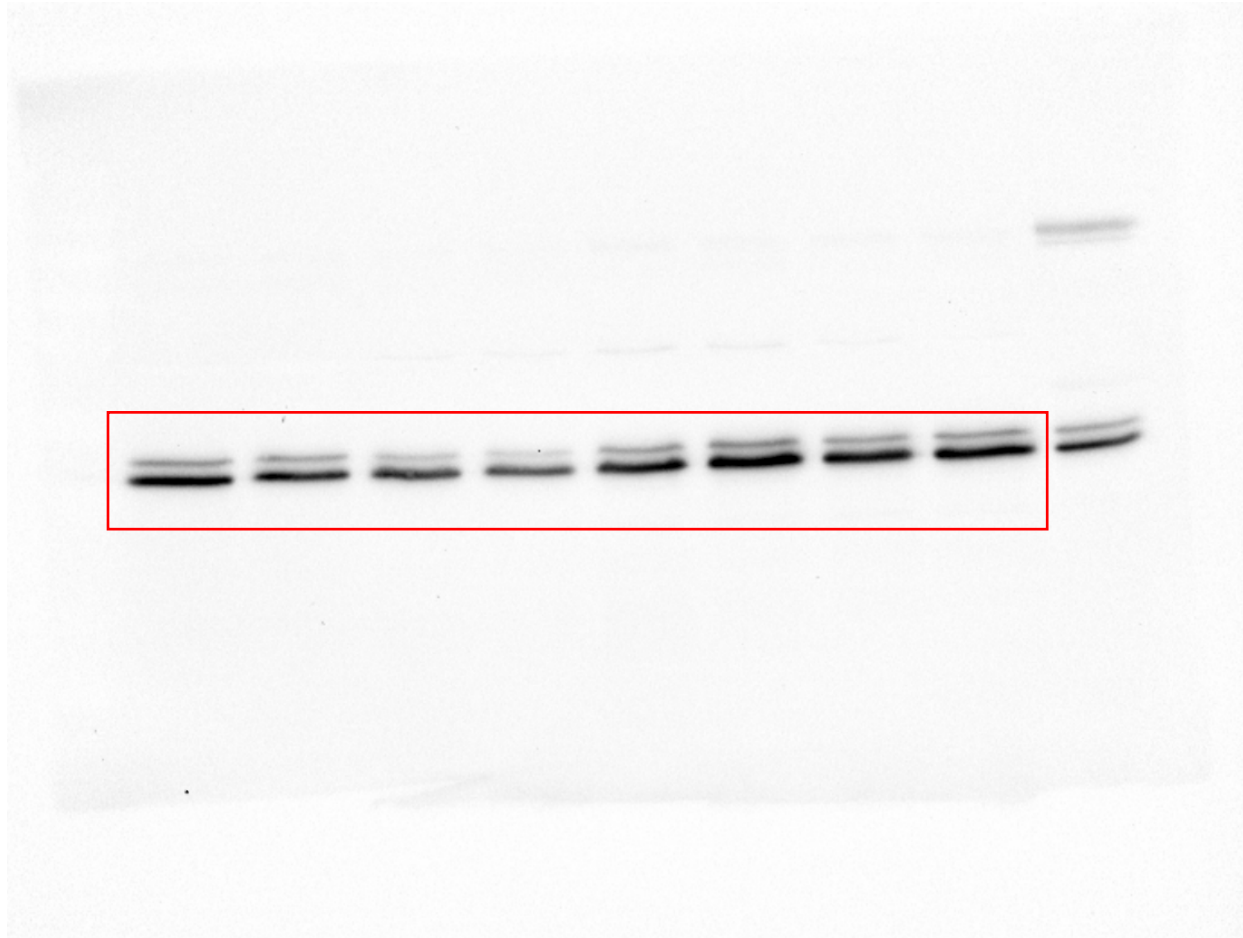

← p-ERK  
42,44 kDa  
(Cell Signaling, 9101s, 1:1000)

# Full unedited gel for Supplementary Figure 4A

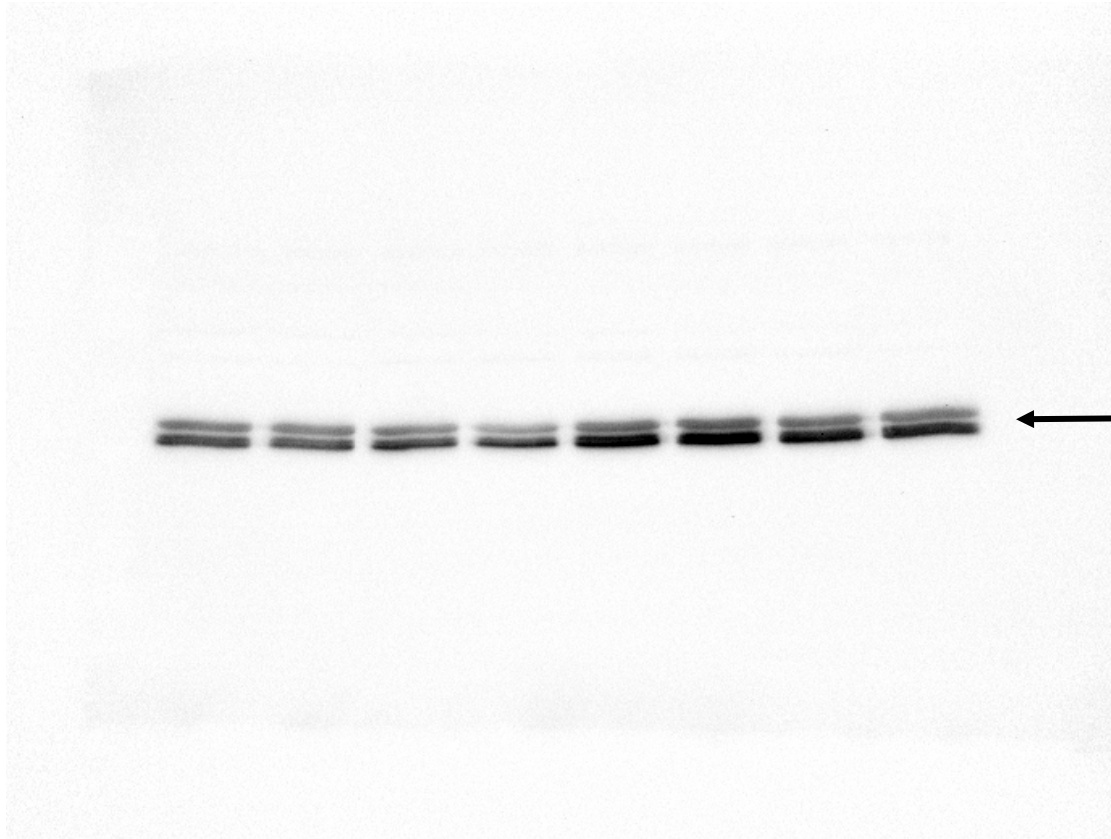

← ERK – p44/42 MAPK  
42,44 kDa  
(Cell Signaling, 9102s, 1:1000)



# Full unedited gel for Supplementary Figure 4A

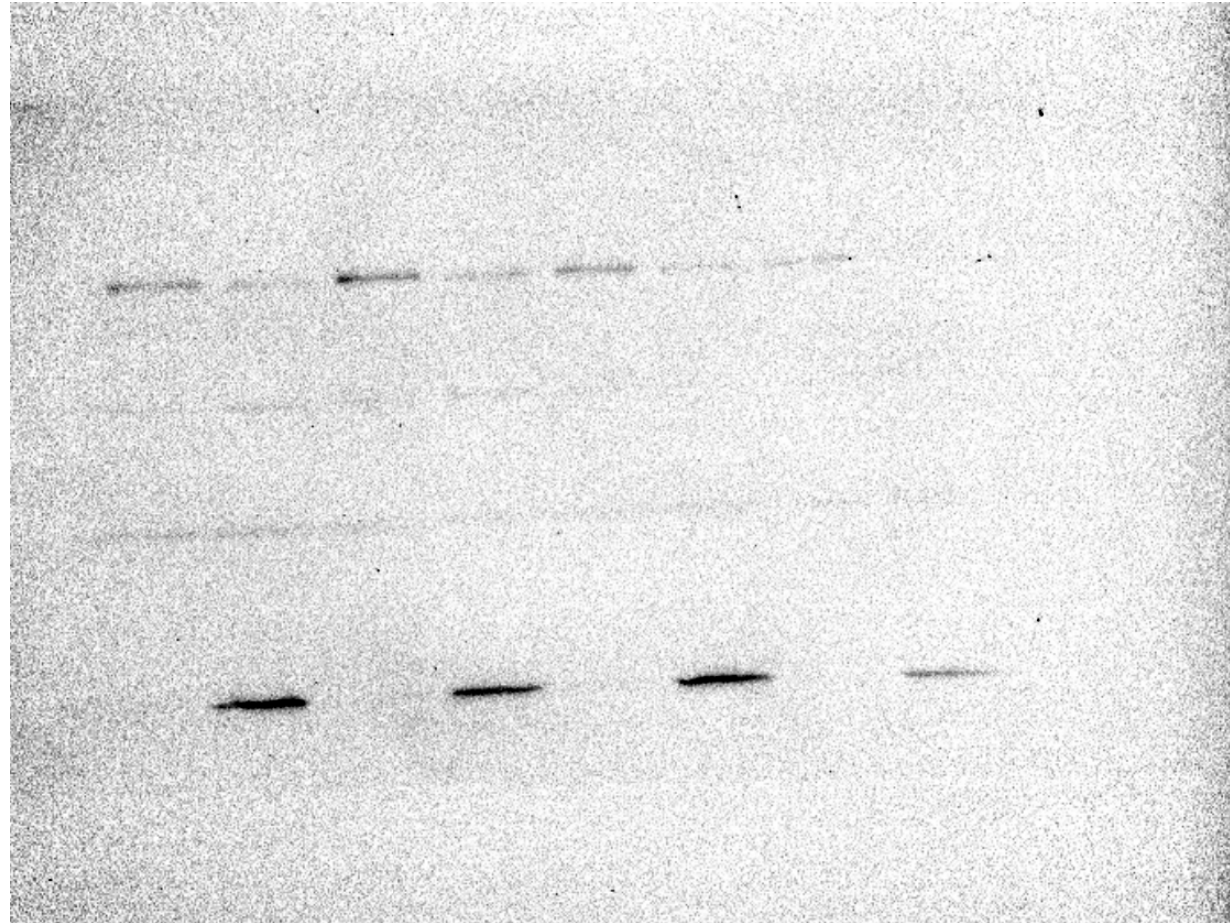

← H3K4me2  
18 kDa  
(Abcam, ab32356, 1:5000)

# Full unedited gel for Supplementary Figure 4A

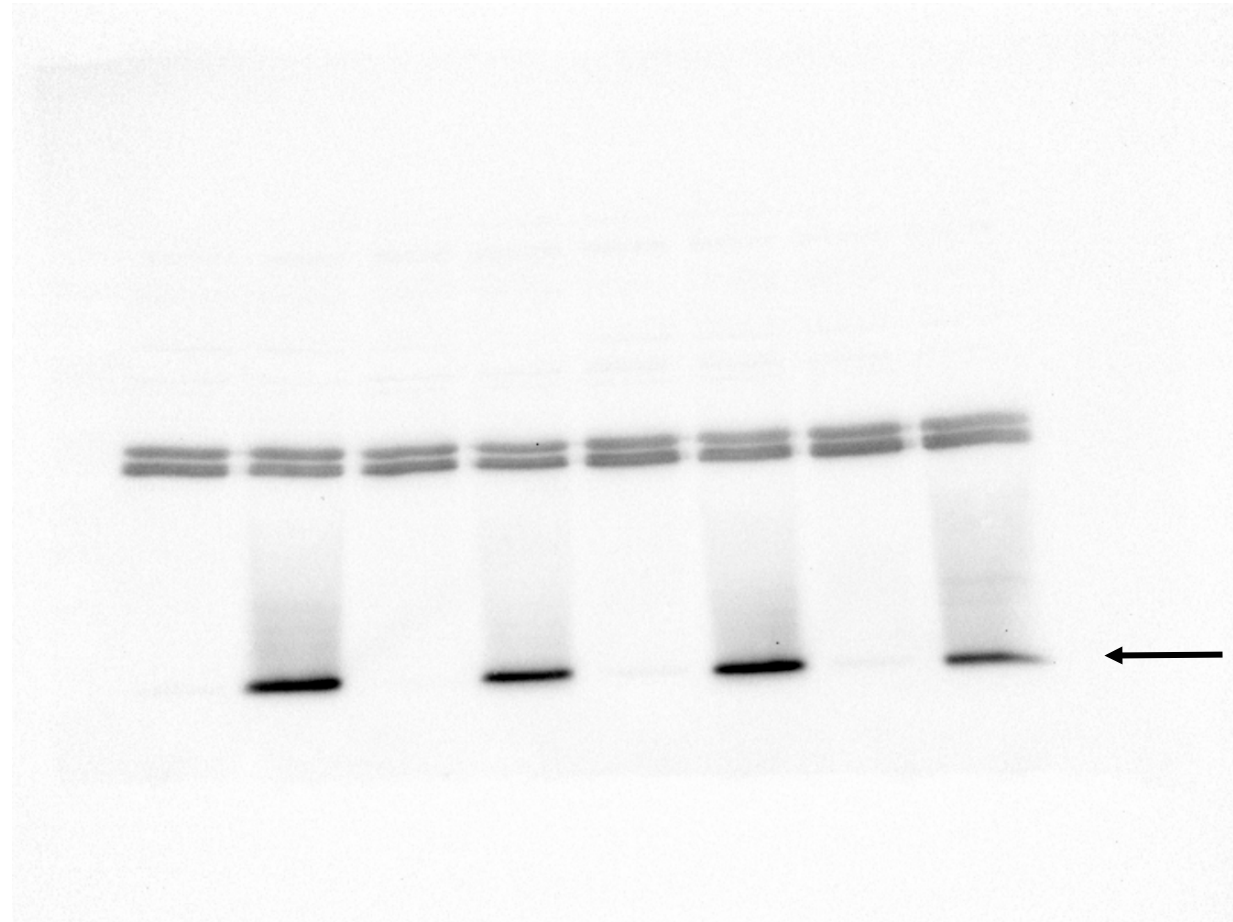

← H3K9ac  
18 kDa  
(Abcam, ab32129, 1:1000)

# Full unedited gel for Supplementary Figure 4A

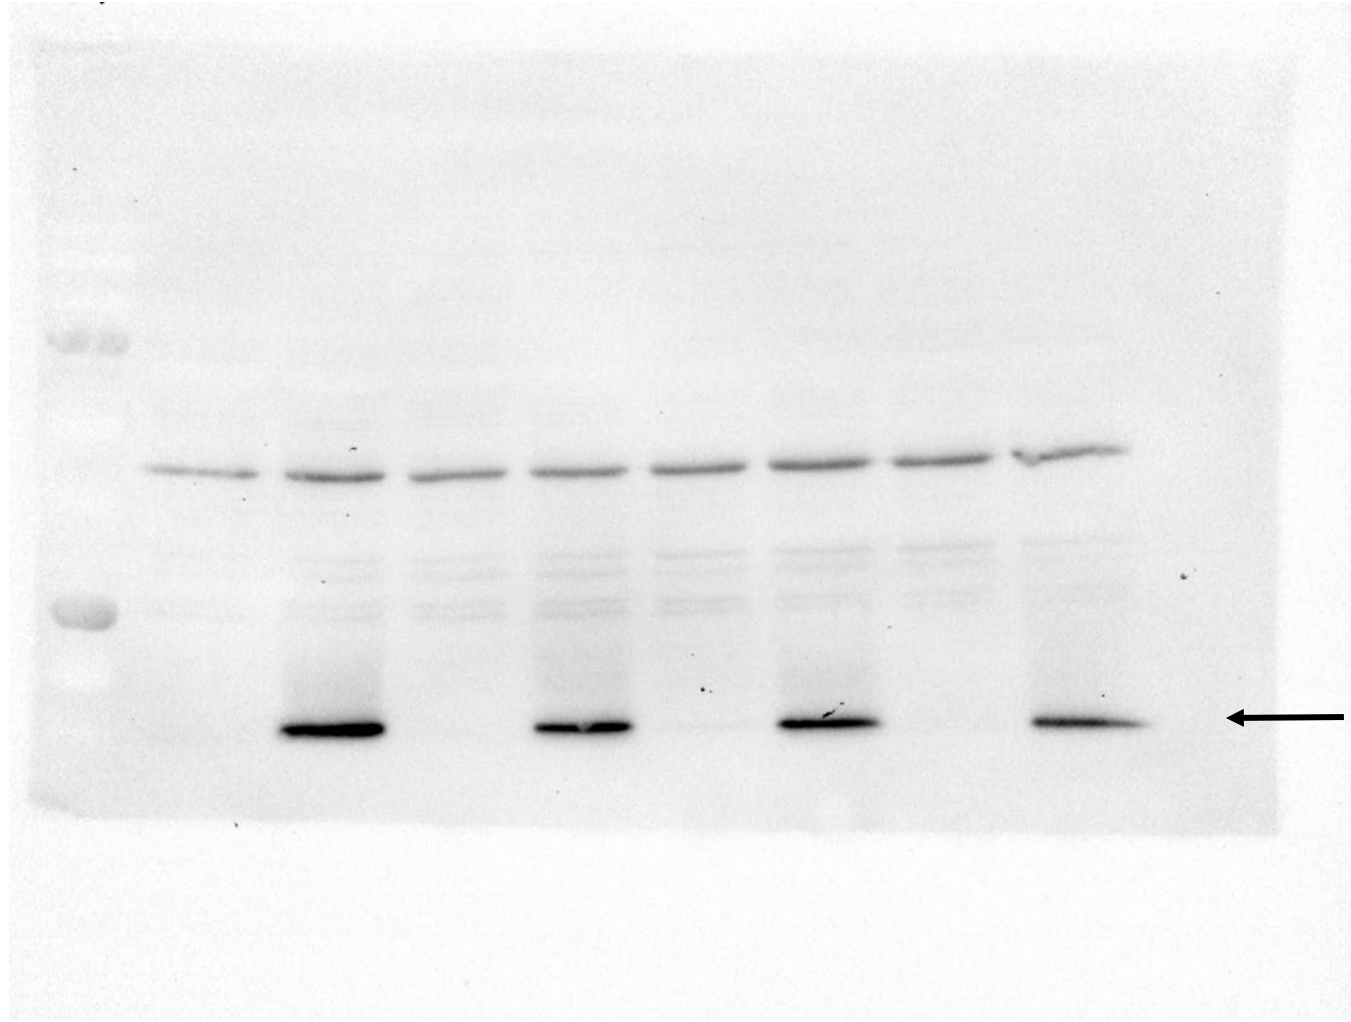

← H3K27ac  
15 kDa  
(Abcam, ab4729, 1:1000)

# Full unedited gel for Supplementary Figure 4A

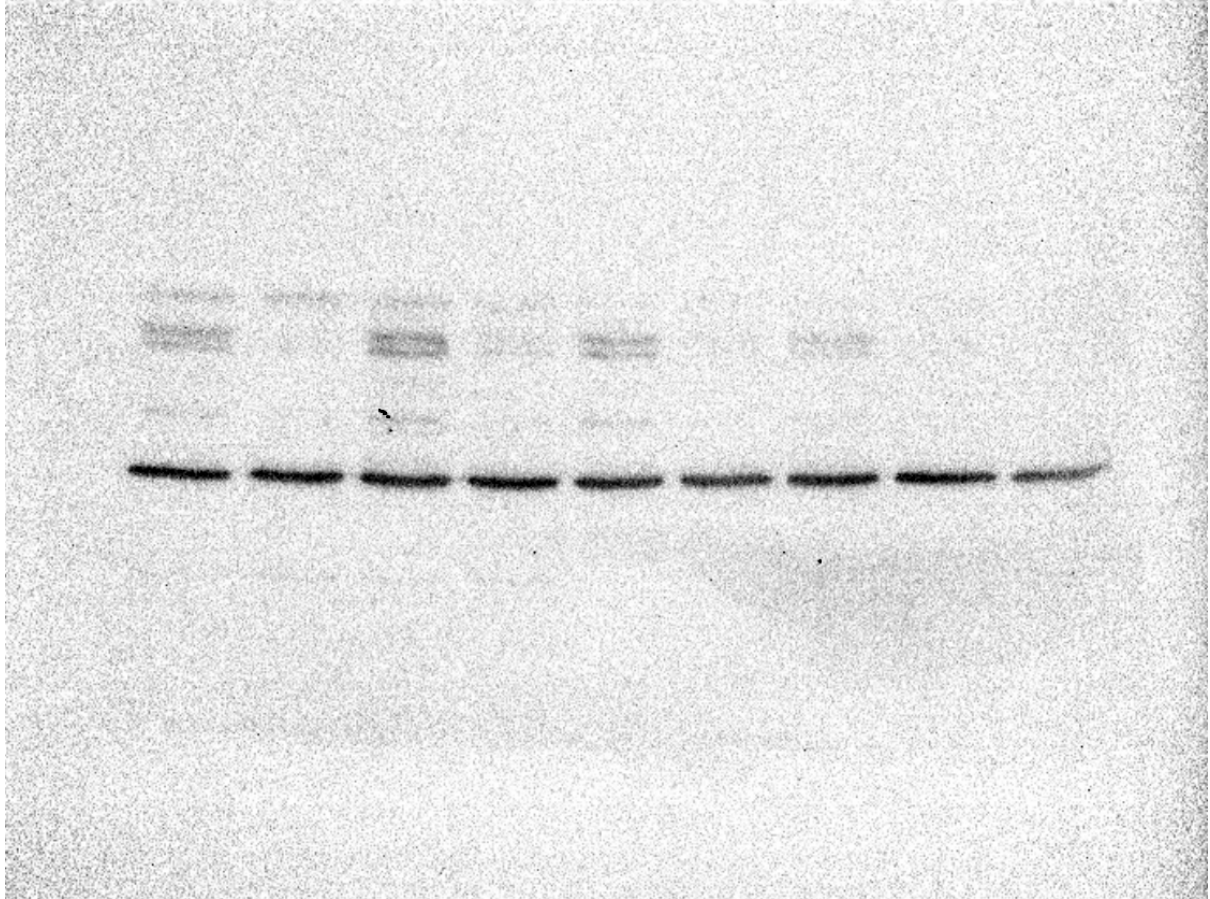

← GAPDH  
36 kDa  
(Cell Signaling, 2118L, 1:2000)

# Full unedited gel for Supplementary Figure 4B

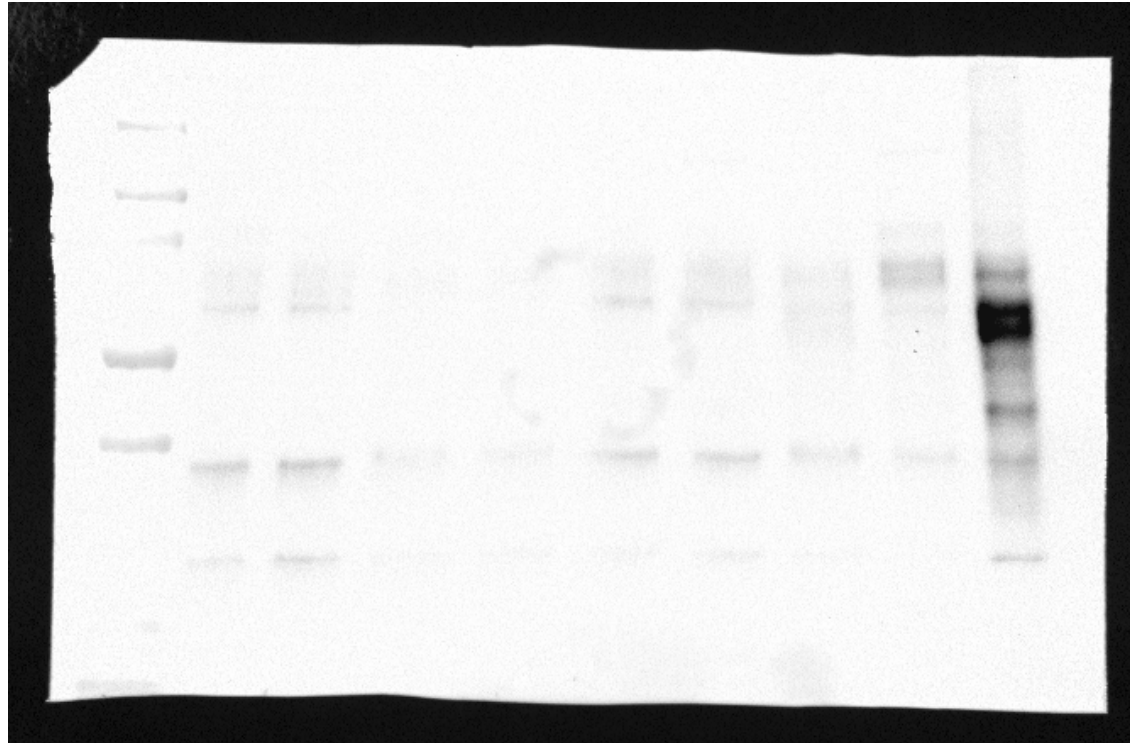

← MITF  
65 kDa  
(Cell Signaling, 12590s, 1:1000)

# Full unedited gel for Supplementary Figure 4B

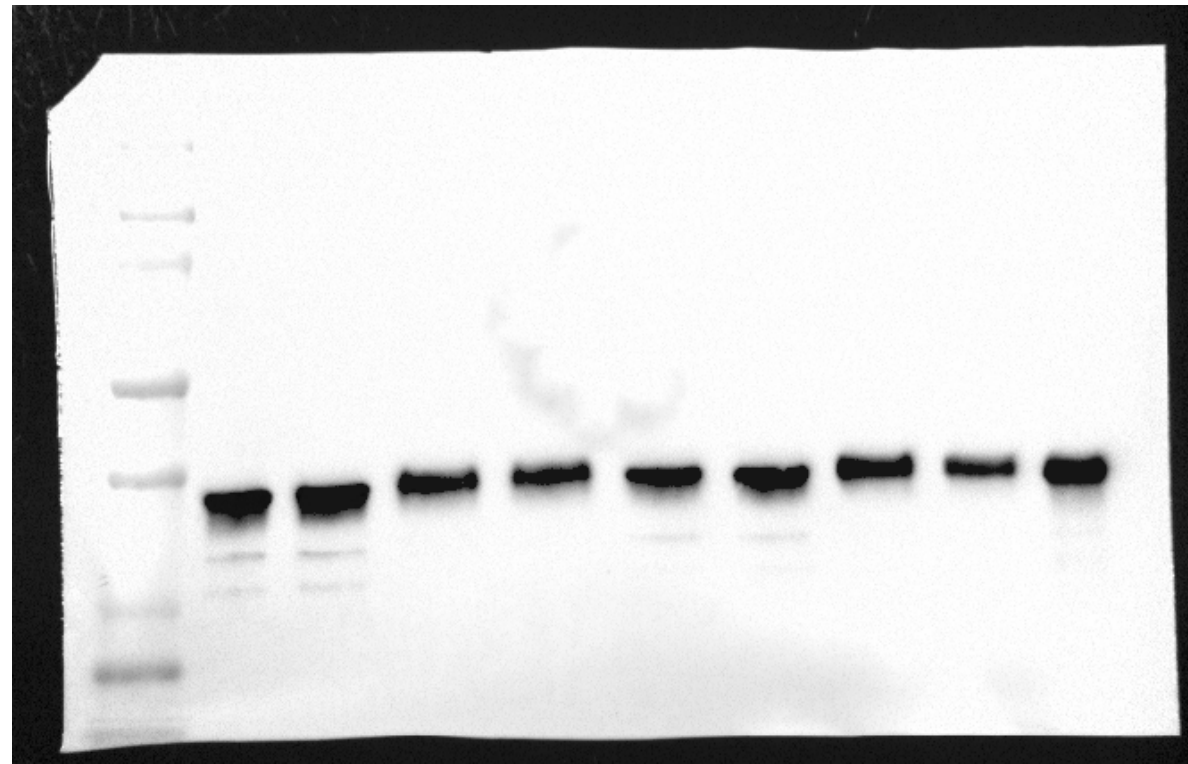

← GAPDH  
36 kDa  
(Cell Signaling, 2118L, 1:2000)

# Full unedited gel for Supplementary Figure 4B

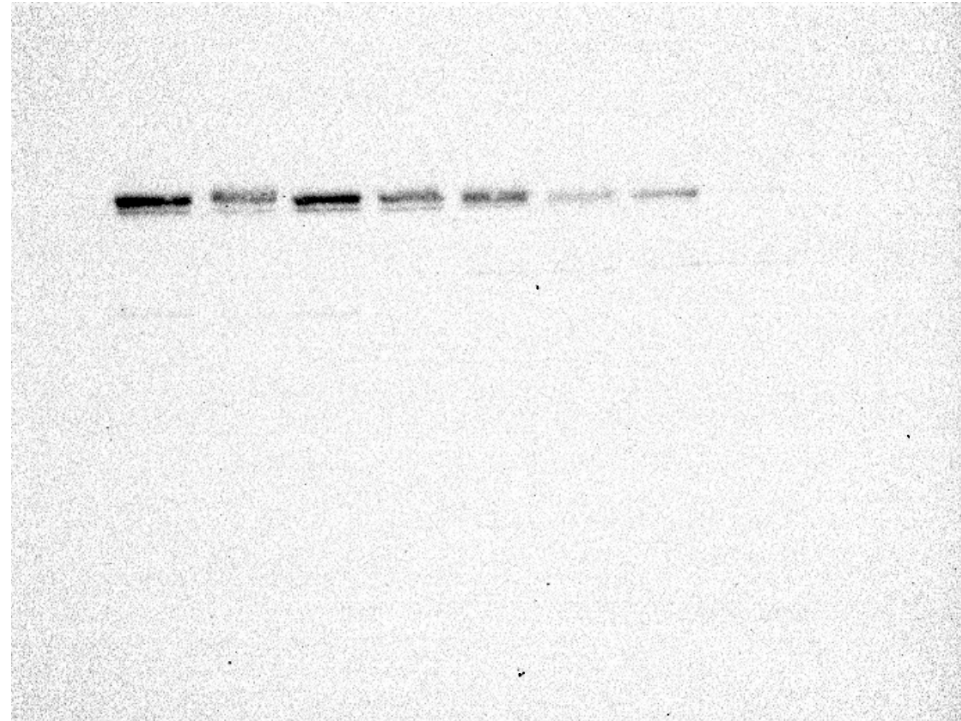

← AXL  
138 kDa  
(Cell Signaling, 8661s, 1:1000)

# Full unedited gel for Supplementary Figure 4B

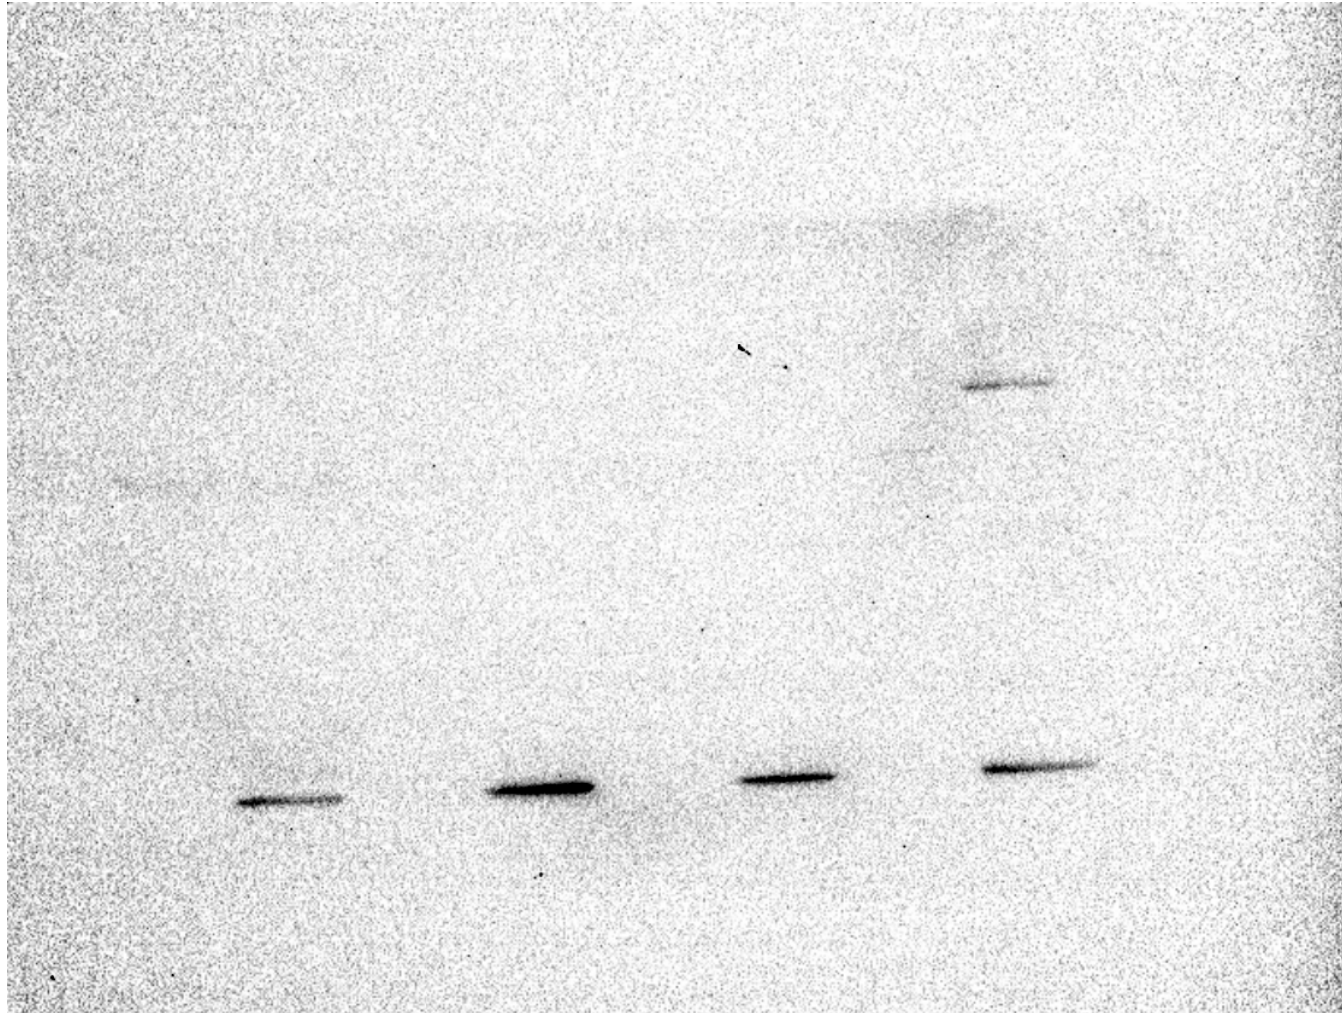

← Cleaved PARP  
89 kDa  
(Cell Signaling, 9541s, 1:1000)



# Full unedited gel for Supplementary Figure 4B

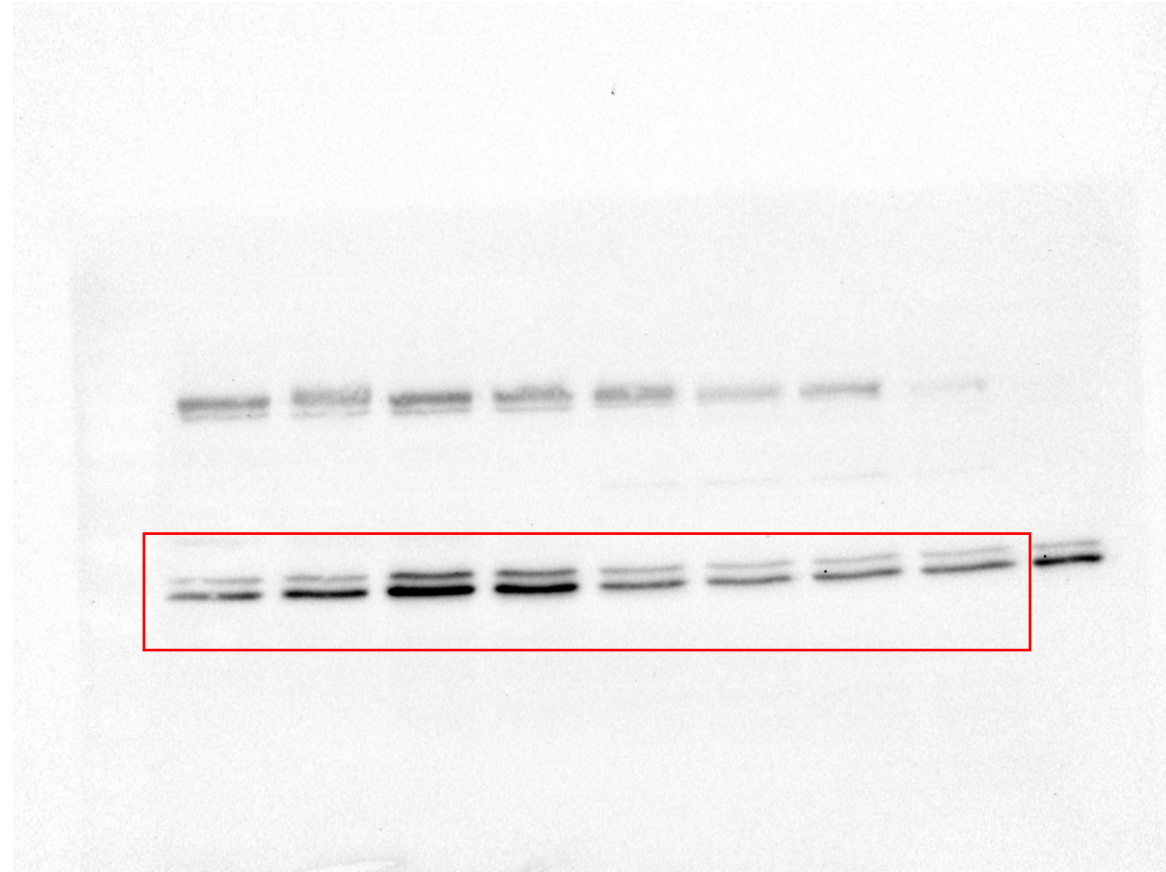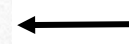

p-ERK  
42,44 kDa  
(Cell Signaling, 9101s, 1:1000)

# Full unedited gel for Supplementary Figure 4B

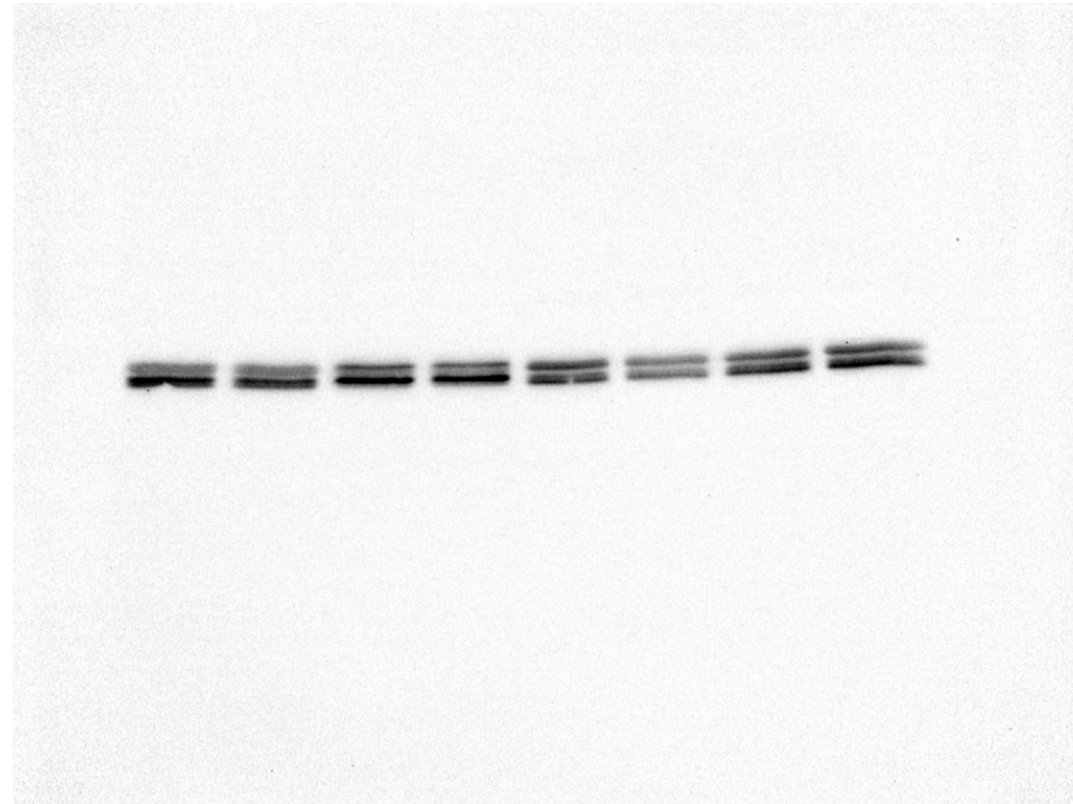

← ERK – p44/42 MAPK  
42,44 kDa  
(Cell Signaling, 9102s, 1:1000)

# Full unedited gel for Supplementary Figure 4B

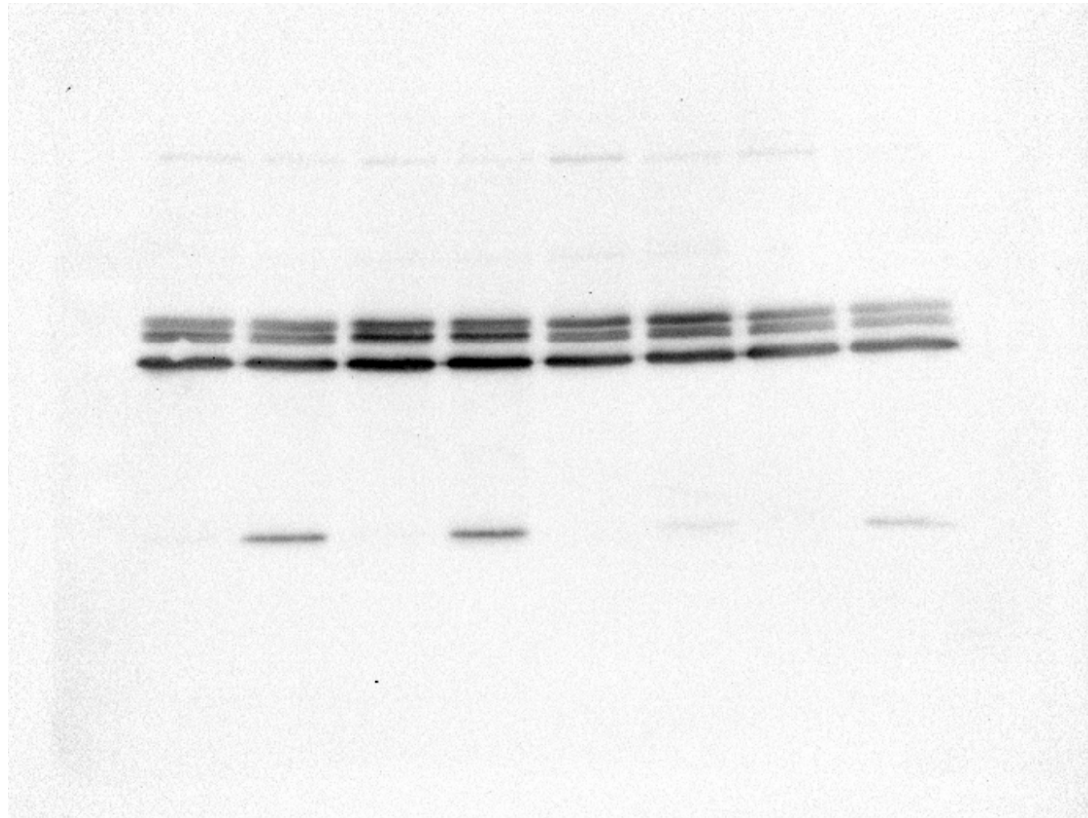

← H3K4me2  
18 kDa  
(Abcam, ab32356, 1:5000)

# Full unedited gel for Supplementary Figure 4B

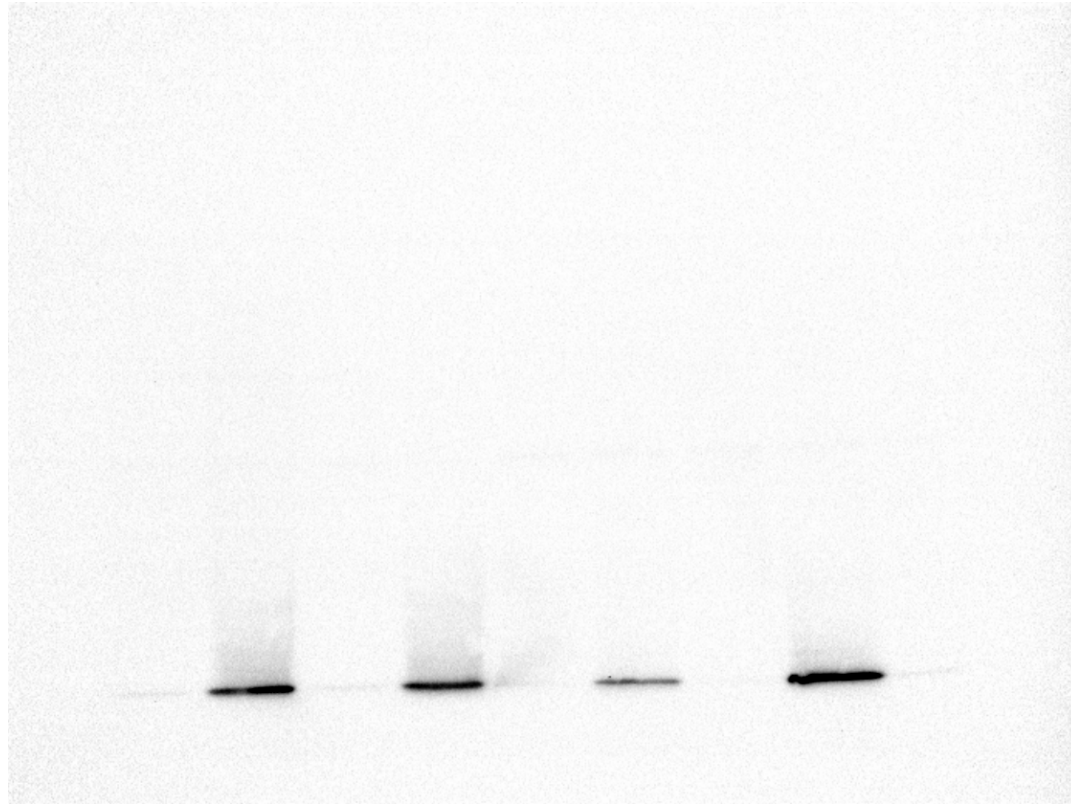

← H3K9ac  
18 kDa  
(Abcam, ab32129, 1:1000)

# Full unedited gel for Supplementary Figure 4B

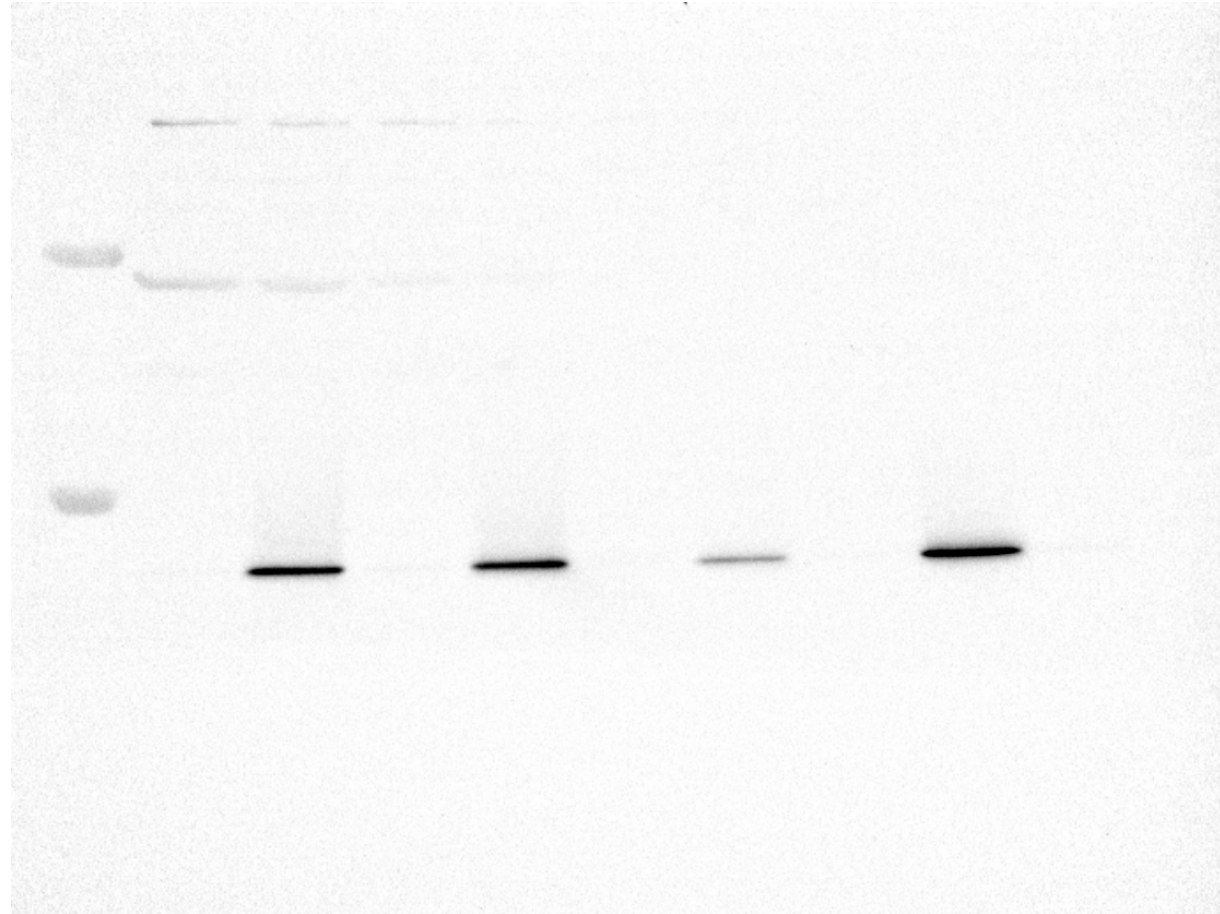

← H3K27ac  
15 kDa  
(Abcam, ab4729, 1:1000)

# Full unedited gel for Supplementary Figure 4B

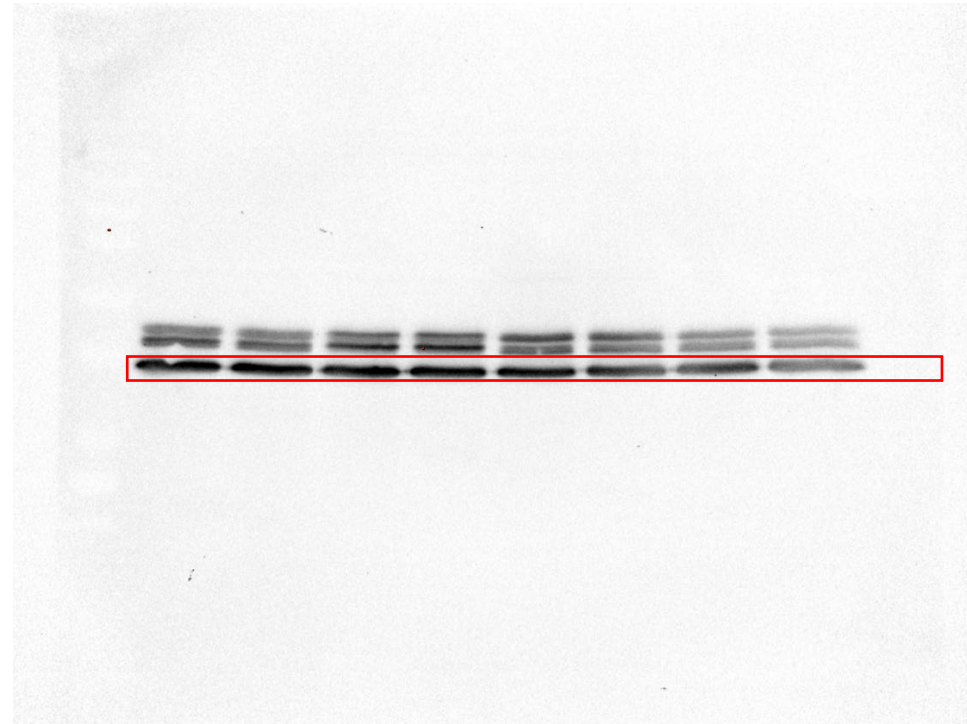

← GAPDH  
36 kDa  
(Cell Signaling, 2118L, 1:2000)

# Full unedited gel for Supplementary Figure 8B

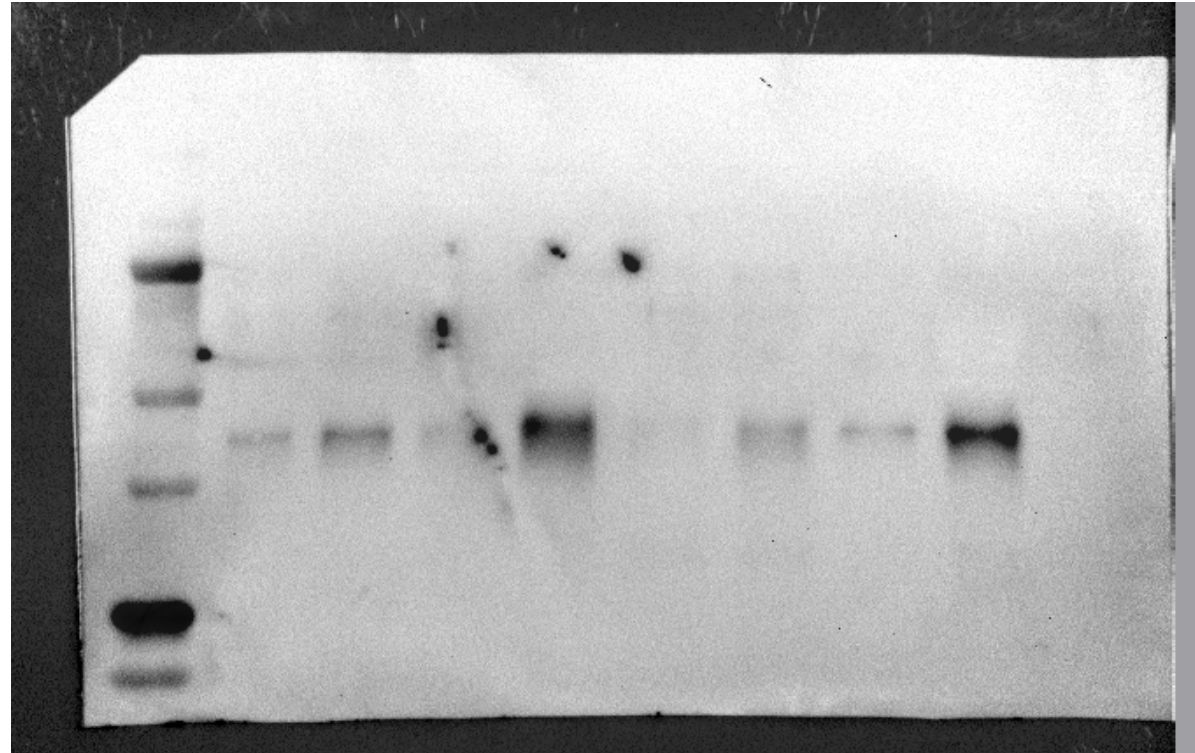

DUSP1  
40 kDa  
(Millipore, 07-535, 1:1000)

# Full unedited gel for Supplementary Figure 8B

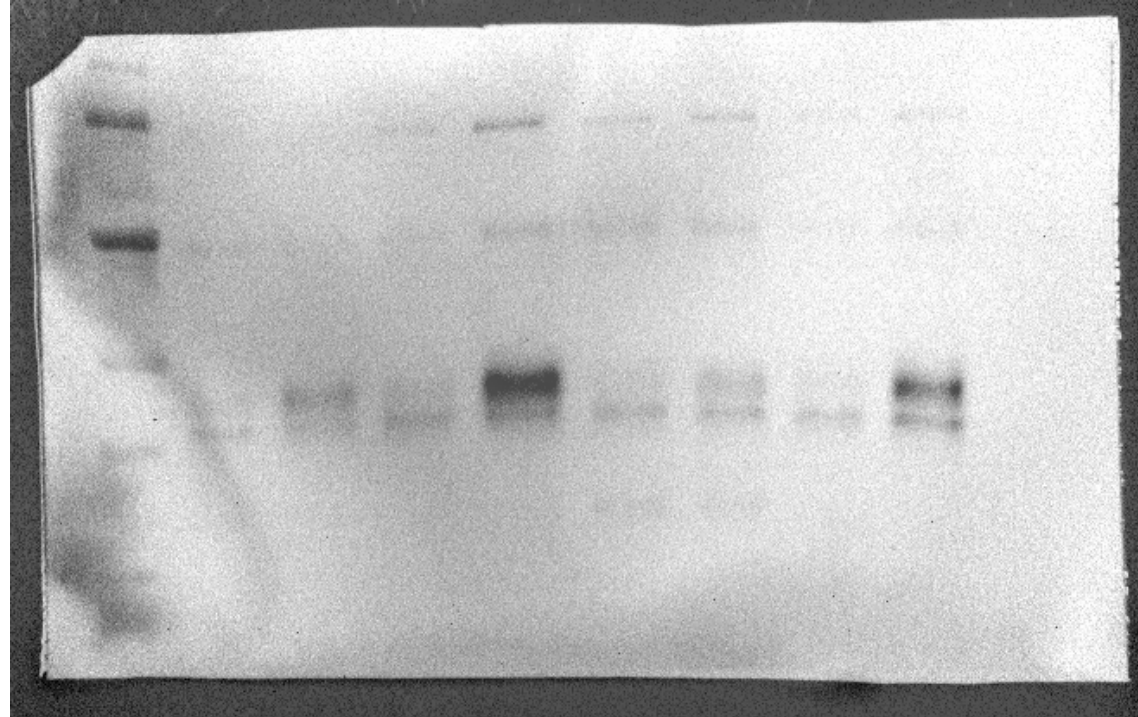

← DUSP5  
42 kDa  
(Abcam, ab200708, 1:1000)



# Full unedited gel for Supplementary Figure 8B

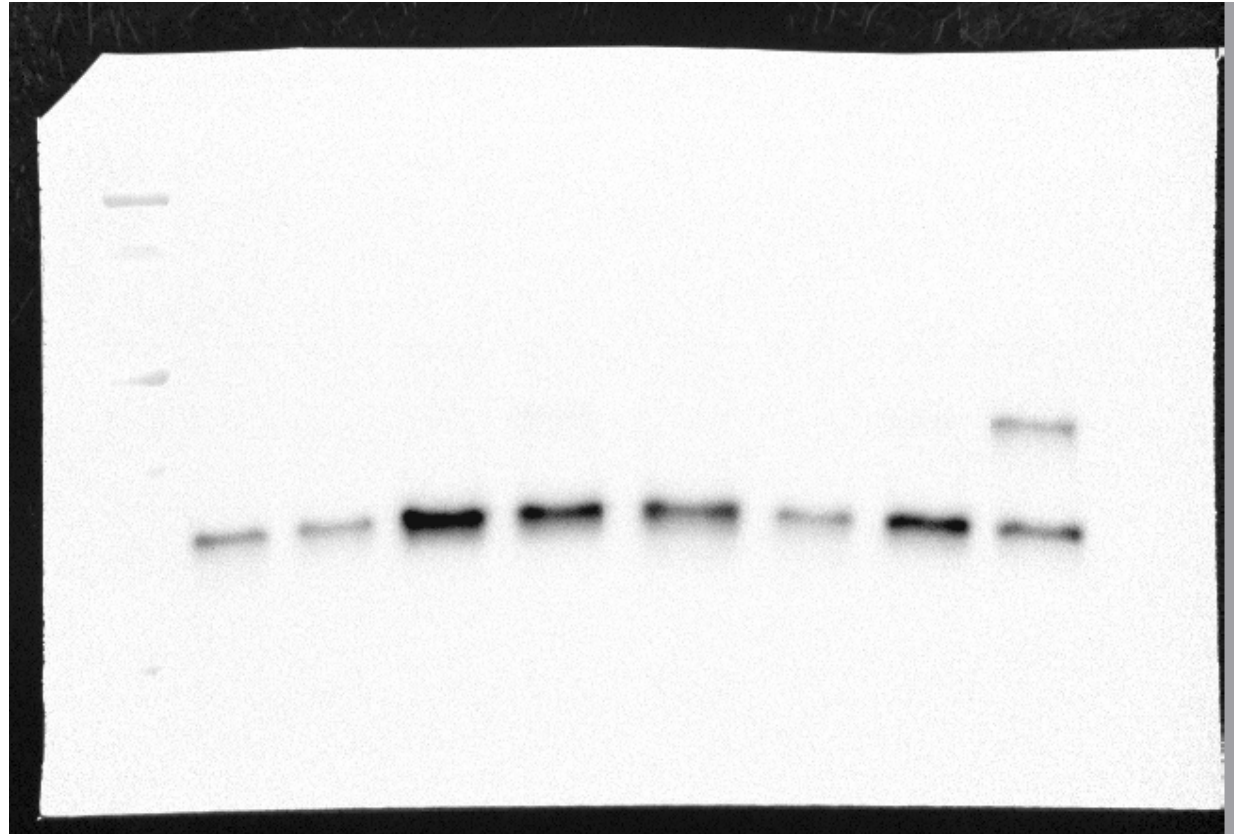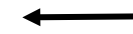

p-p38  
43 kDa  
(Cell Signaling, 4631s, 1:1000)

# Full unedited gel for Supplementary Figure 8B

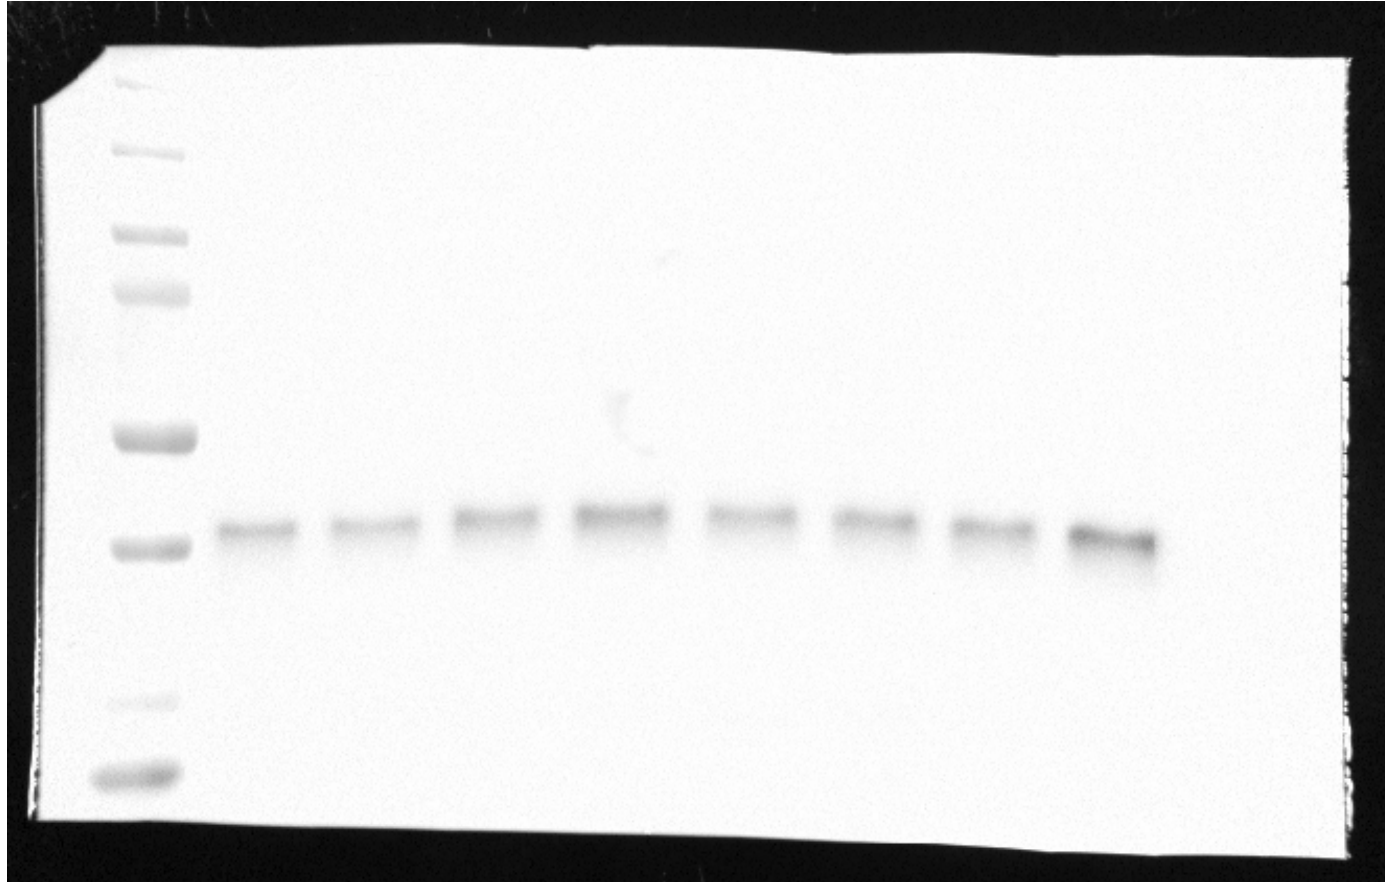

← p38  
40 kDa  
(Cell Signaling, 9212s, 1:1000)

# Full unedited gel for Supplementary Figure 8B

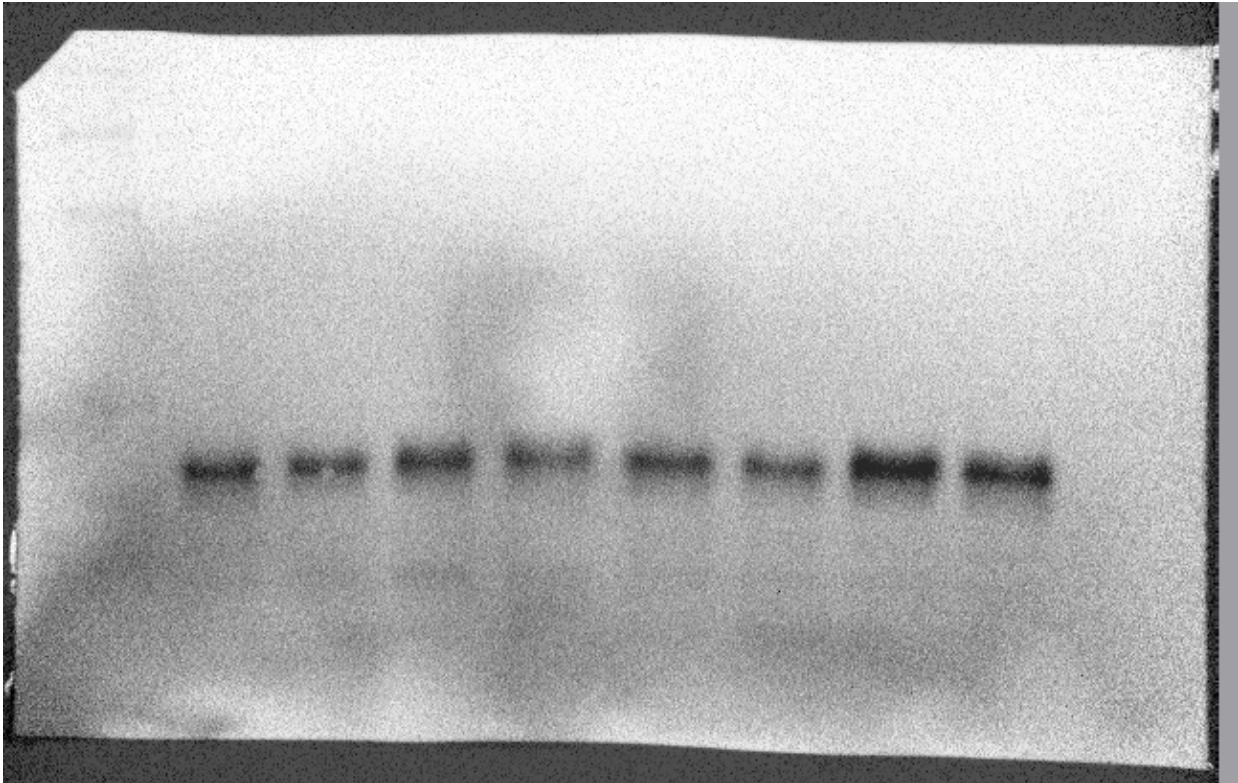

← p-cJUN  
40 kDa  
(Cell Signaling, 9261s, 1:1000)

# Full unedited gel for Supplementary Figure 8B

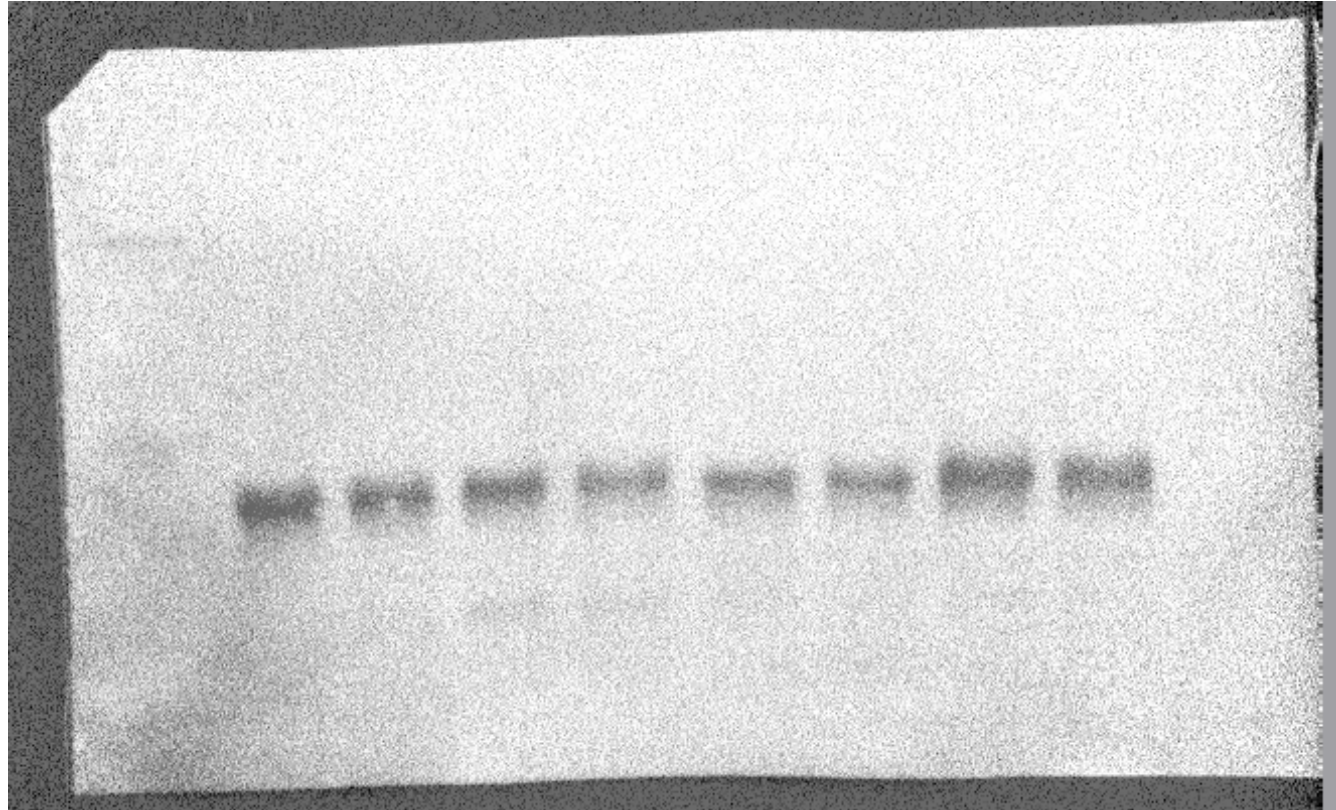

← c-JUN  
48 kDa  
(Cell Signaling, 9165s, 1:1000)

# Full unedited gel for Supplementary Figure 8B

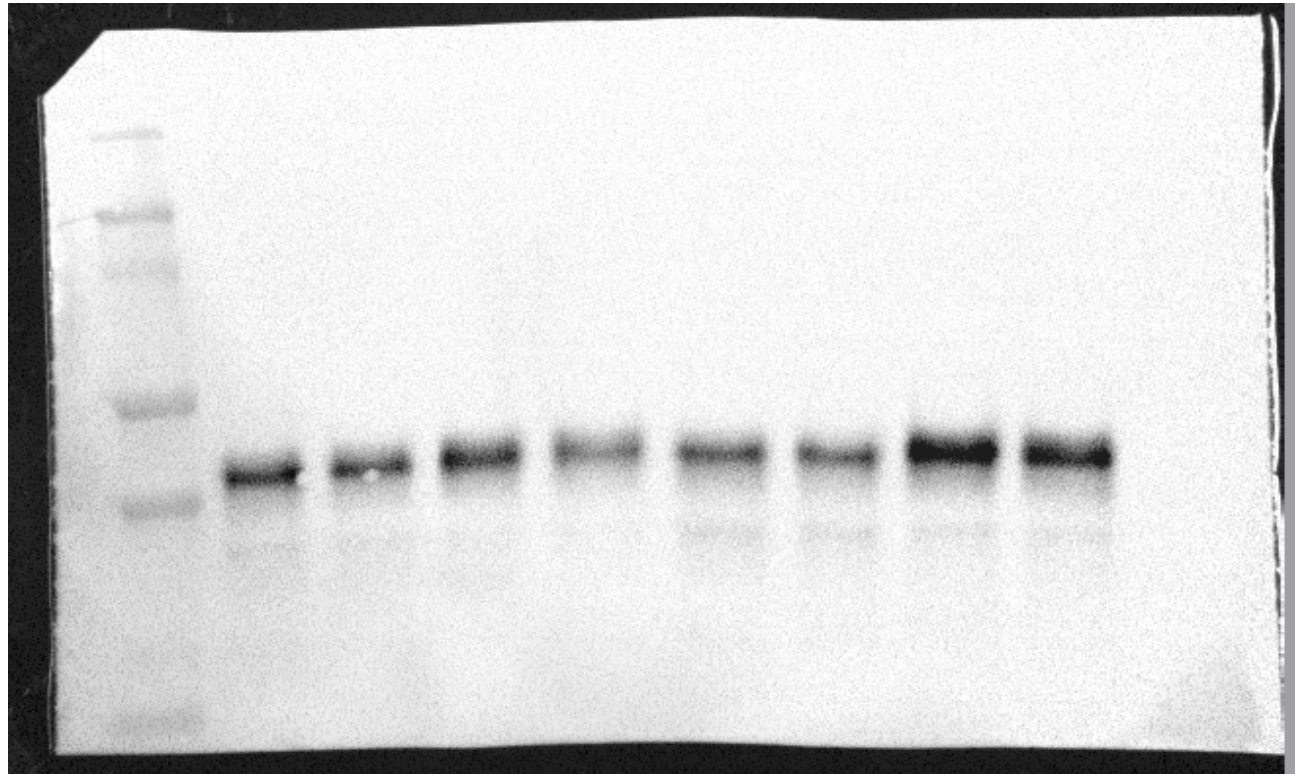

← p-ERK  
42,44 kDa  
(Cell Signaling, 9101s, 1:1000)

# Full unedited gel for Supplementary Figure 8B

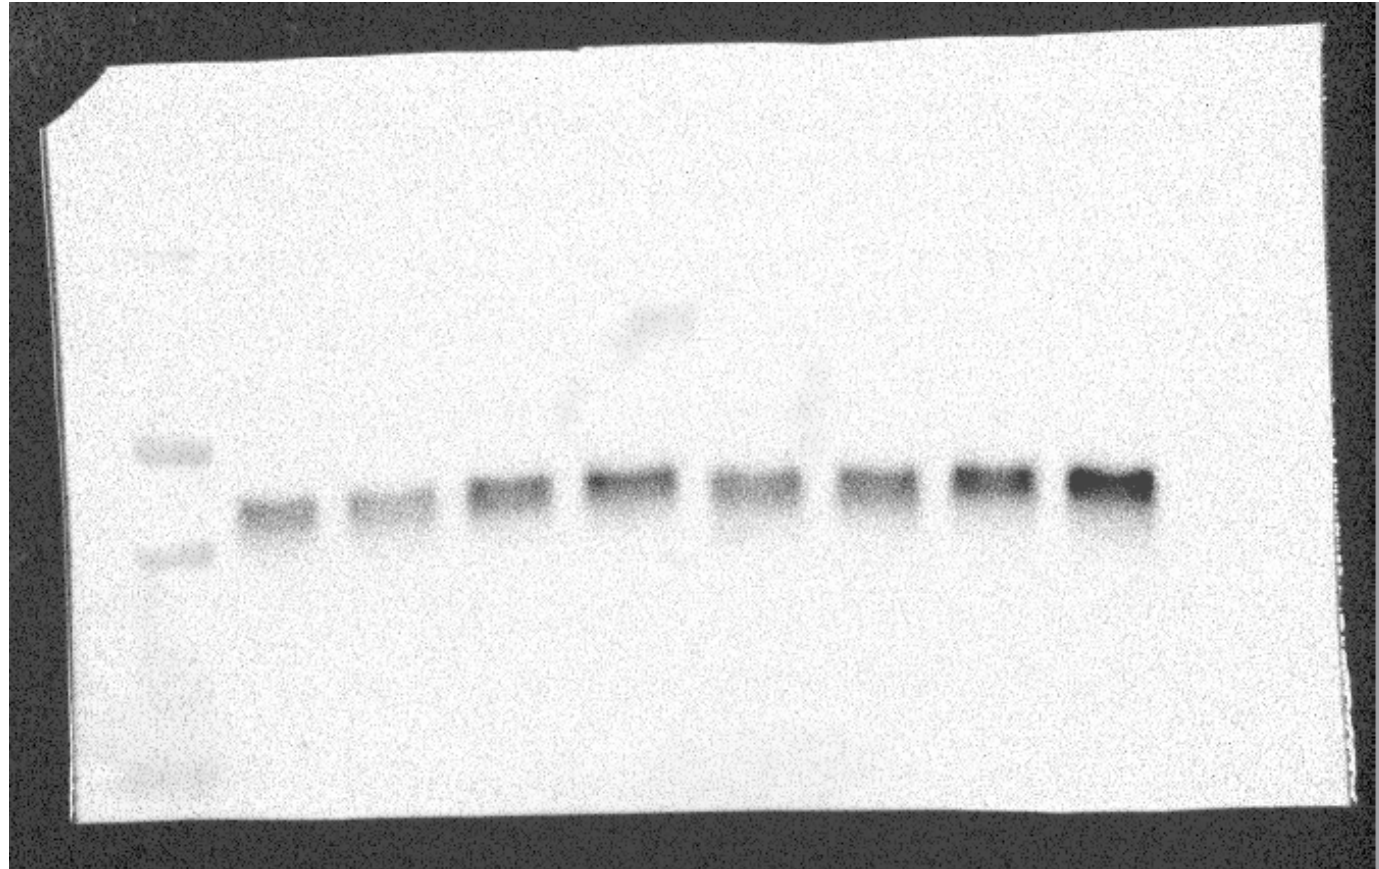

← ERK – p44/42 MAPK  
42,44 kDa  
(Cell Signaling, 9102s, 1:1000)

# Full unedited gel for Supplementary Figure 8B

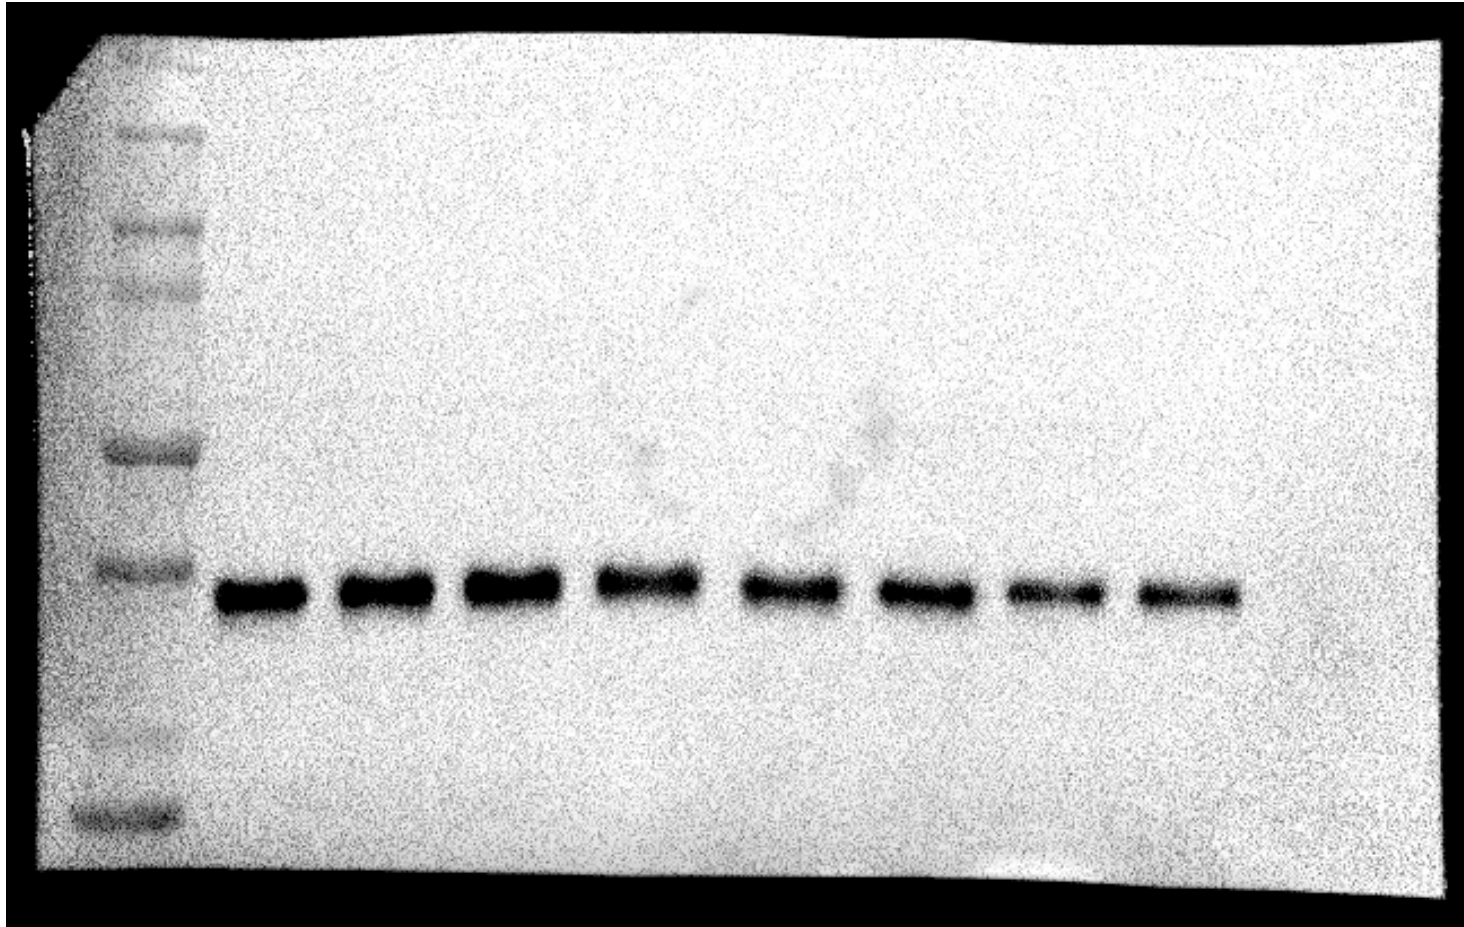

← GAPDH  
36 kDa  
(Cell Signaling, 2118L, 1:2000)

# Full unedited gel for Supplementary Figure 9D

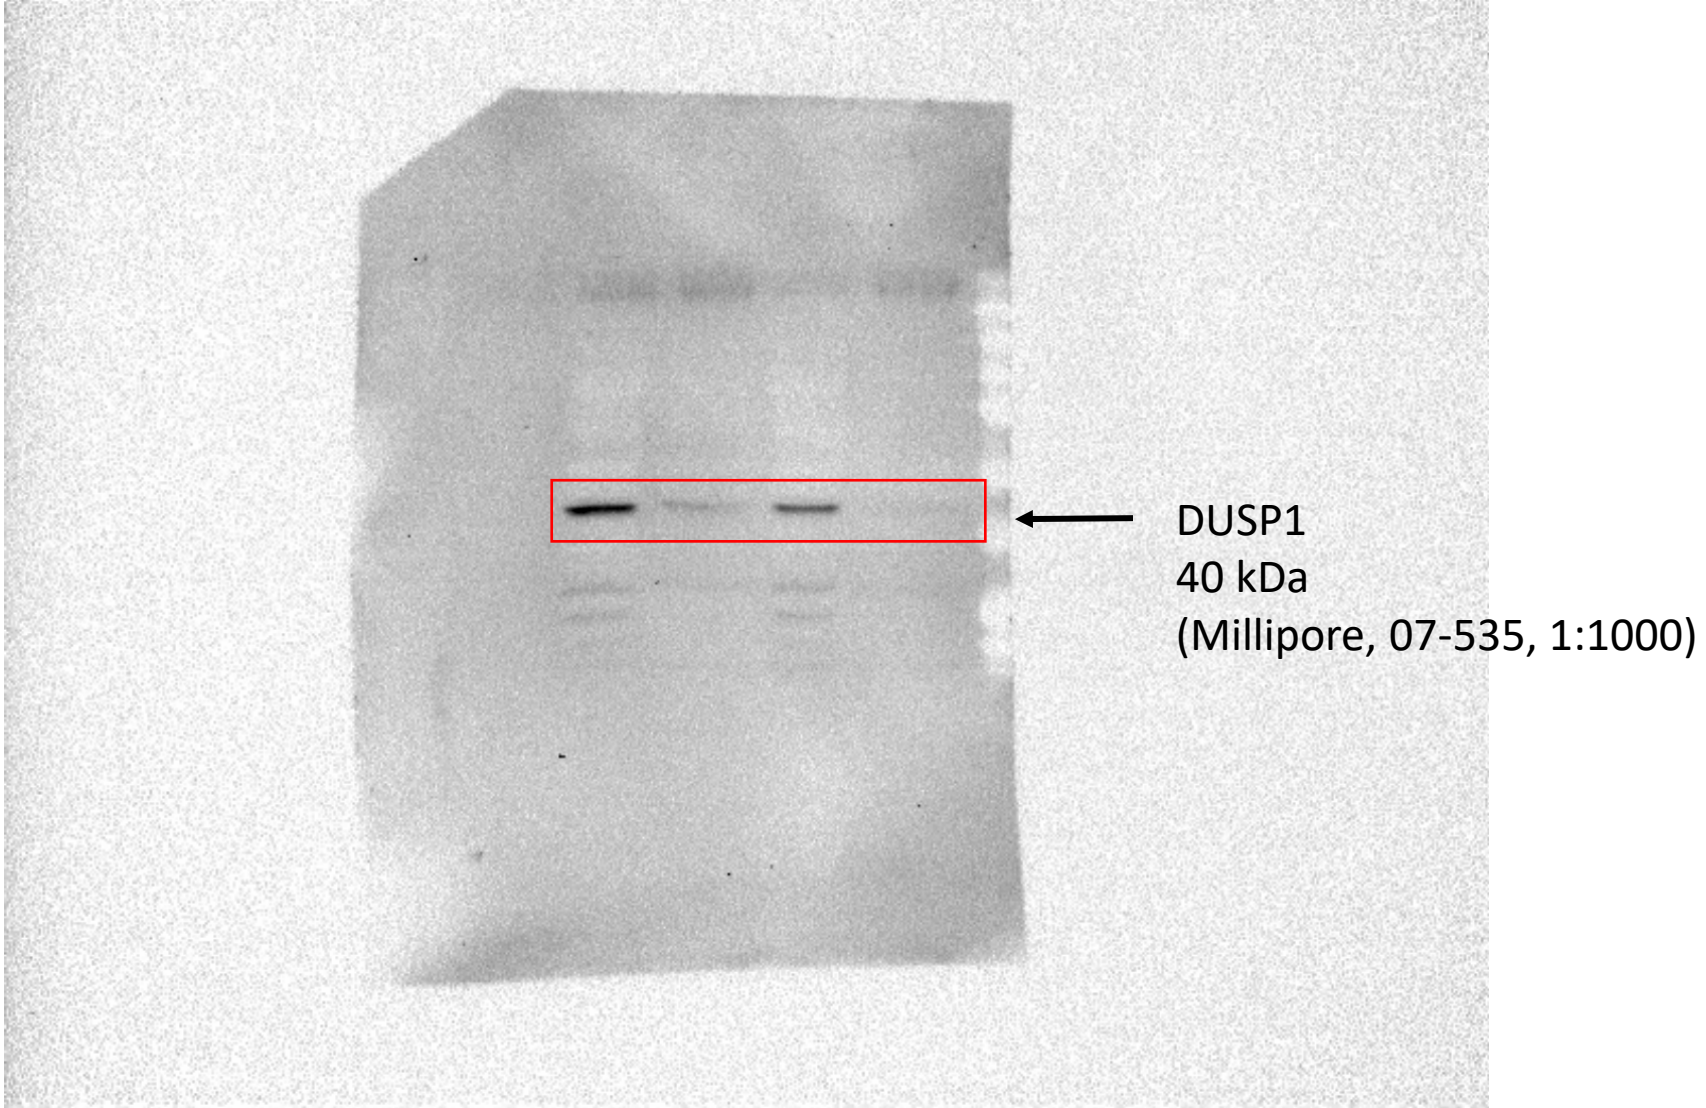



# Full unedited gel for Supplementary Figure 9D

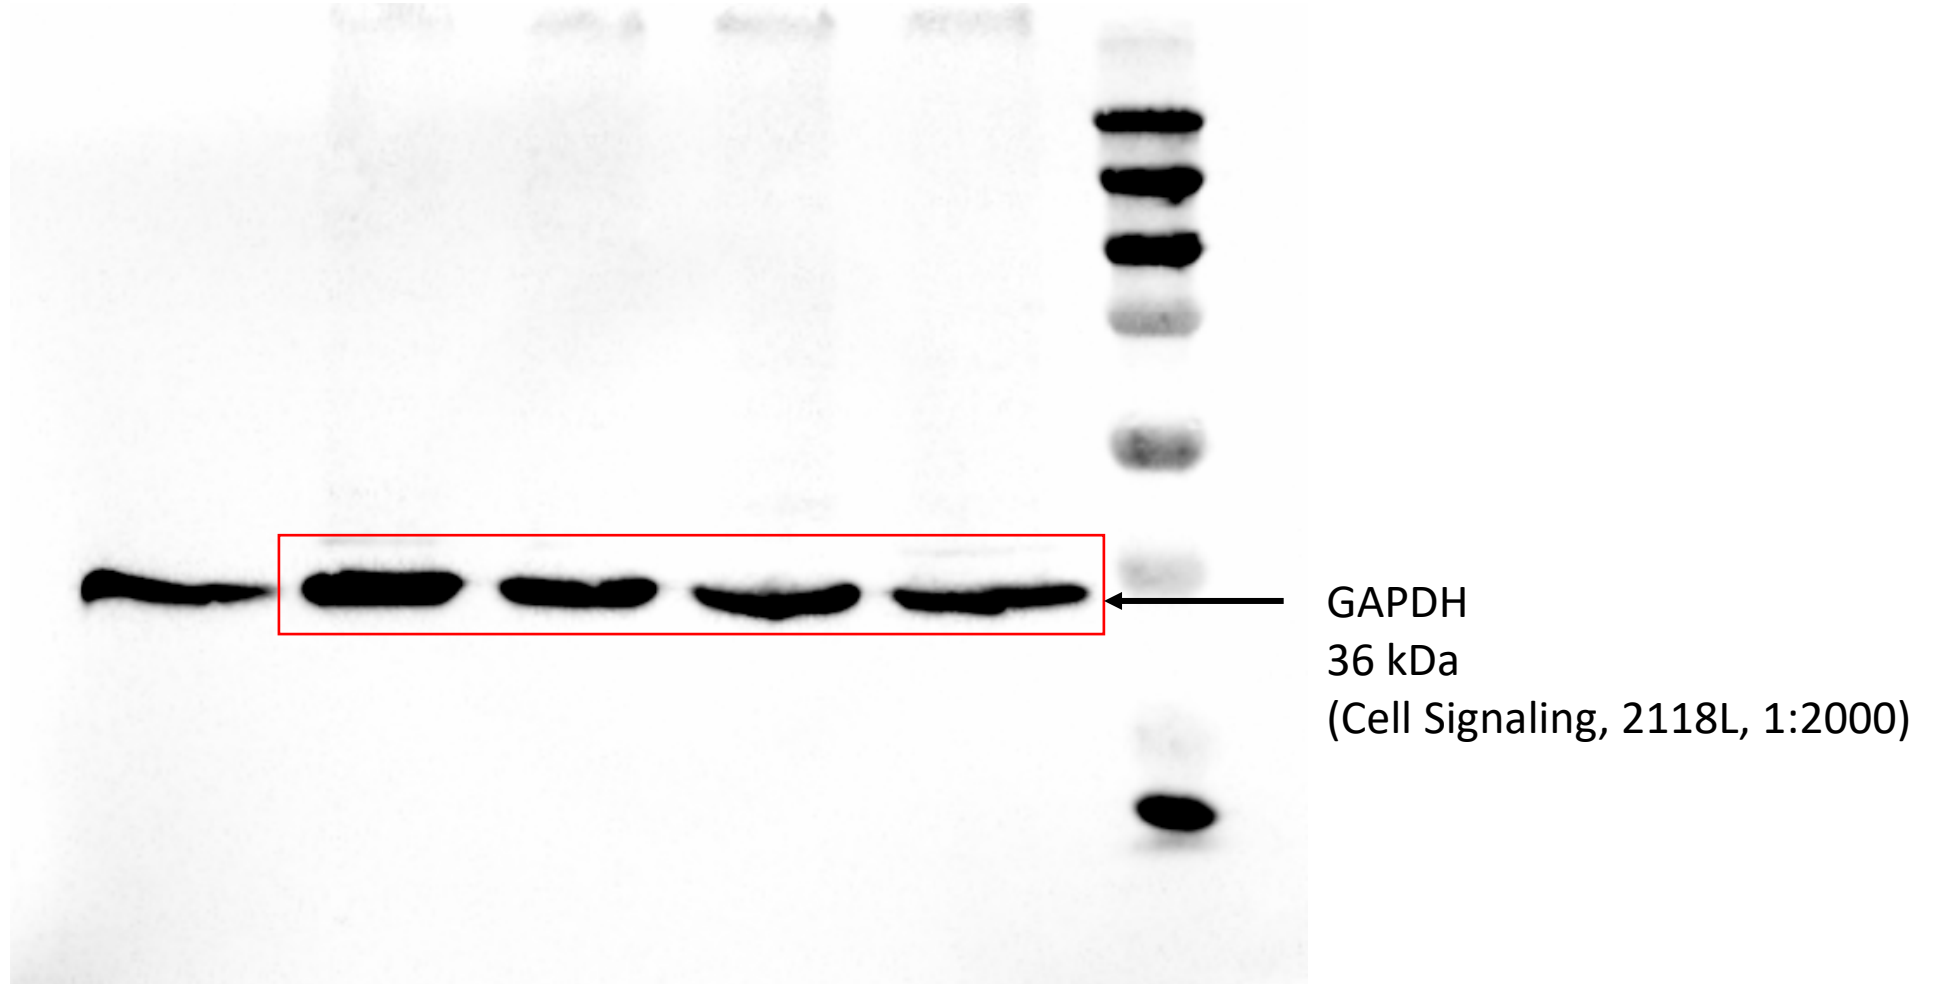

# Full unedited gel for Supplementary Figure 9D

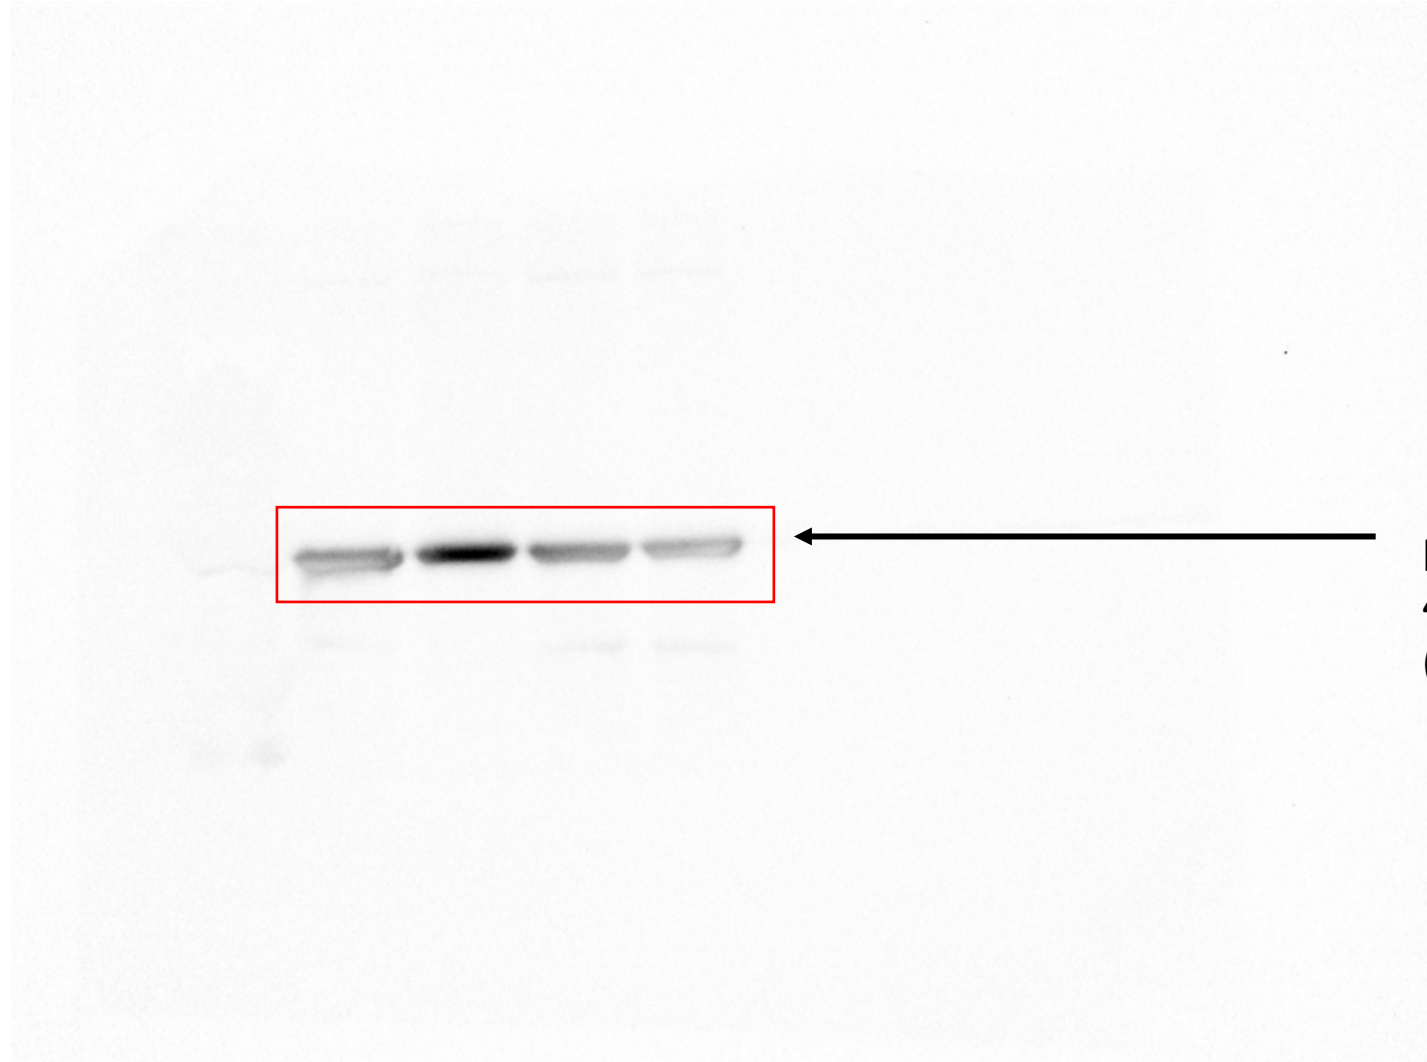

p-p38  
43 kDa  
(Cell Signaling, 4631s, 1:1000)

# Full unedited gel for Supplementary Figure 9D

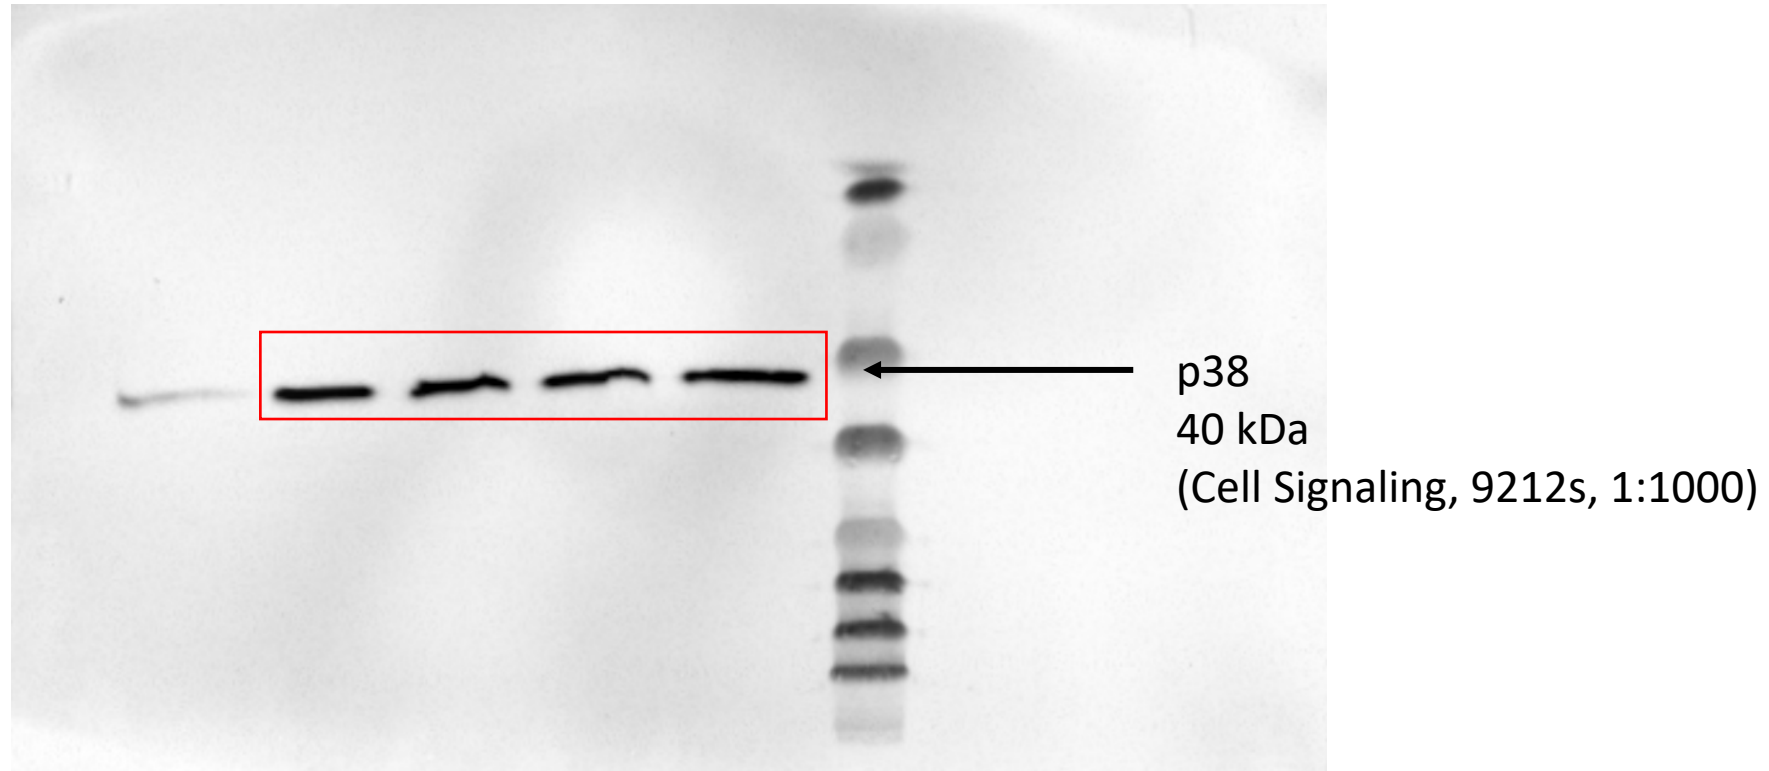

Supplement: jci-134-171063-s111.pdf [file jci-134-171063-s111.pdf]
